# Supplementary material for: Vertical transfer and functional characterization of cotton seed core microbiome
Source: Front Microbiol. 2024 Jan 9;14:1323342. doi: 10.3389/fmicb.2023.1323342 (PMC10803423; doi:10.3389/fmicb.2023.1323342)
Supplement: Supplementary file 5 [file Table_1.xlsx]

## Sheet: Table S1
Table S1. Total number of reads and read length before and after quality checking and normalization
	Rhizosphere	Root	Stem	Leaf	Seed	Seed-P	Total
ASV number	11361	44939	62022	49352	1208	3651	172533
Seqs_Num	1647257	1343457	1348056	1076157	494532	467544	6377003
Total read counts	1884251	2380923	2494597	2045089	1879784	1920732	12605376
Average clean reads per sample	147626	186581	195230	160177	144546	159664	993824
Number of samples	12	12	12	12	12	12	72
Total raw reads before QC	12605376
Average read length before QC	410
Total assigned reads after QC	8261802
Average reads after QC	114747
