# Supplementary material for: Vertical transfer and functional characterization of cotton seed core microbiome
Source: Front Microbiol. 2024 Jan 9;14:1323342. doi: 10.3389/fmicb.2023.1323342 (PMC10803423; doi:10.3389/fmicb.2023.1323342)
Supplement: Supplementary file 6 [file Table_2.xlsx]

## Sheet: Table S2
Table S2. Assigned numbers of bacterial phyla, genera and ASV under different microhabitats and varietiesa
	Phylum	Class	ASV
Rhizo	28	62	618
Root	35	91	1606
Stem	38	102	1972
Leaf	36	97	1775
Seed-P	35	86	1083
Seed	41	96	2032
	R2069			XLZ63			XLZ78
	Phylum	Class	ASV	Phylum	Class	ASV	Phylum	Class	ASV
Rhizo	27	60	586	26	57	631	31	68	636
Root	35	84	1395	34	91	1546	36	97	1877
Stem	39	105	2075	36	96	1780	40	104	2061
Leaf	35	96	1788	37	96	1775	36	98	1761
Seed-P	35	89	1020	34	87	1095	35	83	1134
Seed	41	96	2025	41	97	2099	42	96	1973
a: ASV table used to calculate phyla, genera and ASV number was resampled to 2000 and filltered with the condition: ASVs ≥ 1 count.
