# Supplementary material for: Vertical transfer and functional characterization of cotton seed core microbiome
Source: Front Microbiol. 2024 Jan 9;14:1323342. doi: 10.3389/fmicb.2023.1323342 (PMC10803423; doi:10.3389/fmicb.2023.1323342)
Supplement: Supplementary file 7 [file Table_3.xlsx]

## Sheet: Sheet1
Table S3: Alpha diversity under microhabitat and variety variations as indicated by Chao1, Shannon, Simpson, and ACE indices with associated P values.
Microhabitats		P	Rhizo		Root		Stem		Leaf		Seed		Seed-P
			Mean	SD	Mean	SD	Mean	SD	Mean	SD	Mean	SD	Mean	SD
Chao1		4.2e-06	1440.99	350.419	5429.2	1716.23	6653.23	1818.02	5432.95	413.642	611.75	25.0821	450.417	120.664
Shannon		2.7e-05	4.56467	0.845858	10.0665	0.287478	10.0423	0.278783	9.83664	0.0779232	7.81425	0.501444	7.63745	1.98833
Simpson		4.57e-14	0.7698	0.0745	0.9935	0.0013	0.9876	0.0024	0.9858	0.002	0.9791	0.0142	0.9453	0.126
ACE		1.16e-27	1446.54	352.93	5459.92	1714.38	6674.31	1815.06	5457.31	415.9	611.69	24.89	450.35	120.48
Microhabitats-Varieties		P	R2069		XLZ63		XLZ78
			Mean		Mean		Mean
Rhizo	Chao1	0.15	4859		6776.87		5656.04
	Simpson	0.738	0.74475		0.78755		0.7772
	ACE	0.149	1218.28		1702.14		1419.2
	Shannon	0.68	17.1639		19.443		18.1691
Root	Chao1	0.24	4422.32		5353.96		6511.31
	Simpson	0.272	0.994225		0.993475		0.992675
	ACE	0.242	4454.61		5383.77		6541.37
	Shannon	0.7	9.96298		10.0938		10.1426
Stem	Chao1	0.16	7358.9		5238.38		7362.42
	Simpson	0.153	0.988325		0.9857		0.988625
	ACE	0.166	7376.55		5263.58		7382.8
	Shannon	0.098	10.151		9.80312		10.1727
Leaf	Chao1	0.93	5501.22		5416.84		5380.78
	Simpson	0.324	0.987		0.98575		0.984775
	ACE	0.934	5523.58		5440.89		5407.46
	Shannon	0.29	9.88265		9.83388		9.7934
Seed	Chao1	0.24	594.5		623.75		617
	Simpson	0.072	0.9772		0.969175		0.99105
	ACE	0.238	594.576		616.608		623.89
	Shannon	0.027	7.63605		8.31165		7.49505
Seed-P	Chao1	0.46	403.5		434.5		513.25
	Simpson	0.171	0.848		0.993825		0.993925
	ACE	0.458	403.764		513.005		434.292
	Shannon	0.23	6.22122		8.25145		8.43967
