# Supplementary material for: Vertical transfer and functional characterization of cotton seed core microbiome
Source: Front Microbiol. 2024 Jan 9;14:1323342. doi: 10.3389/fmicb.2023.1323342 (PMC10803423; doi:10.3389/fmicb.2023.1323342)
Supplement: Supplementary file 8 [file Table_4.xlsx]

## Sheet: Table S4-1
Table S4-1. Taxonomic composition of bacterial communities under different microhabitats at the class level
Compartment-Class	Rhizo	Root	Stem	Leaf	Seed-P	Seed
ABY1	0	0.000117143	0.000405591	0.000417533	0.00021025	7.43991e-05
Abditibacteria	0	4.10503e-05	0	0	0.000101977	1.8163e-05
Acidimicrobiia	0.145465	0.0589457	0.0112162	0.0105031	0.0265658	0.0148811
Acidobacteriae	0.0040257	0.0452897	0.014251	0.0131908	0.230487	0.0134316
Actinobacteria	0.132291	0.0528208	0.0468373	0.043715	0.0868261	0.0640835
Alphaproteobacteria	0.868555	0.513623	0.171807	0.167693	0.371019	0.245658
Aminicenantia	0	0	0	0	0.00033899	4.19116e-05
Anaerolineae	0.00482862	0.00287329	0.00594432	0.00567933	0.0147686	0.0080016
Babeliae	0.000126739	0.00173454	0.00492791	0.00484224	0.00322353	0.00110096
Bacilli	0.0148025	0.285891	0.721104	0.747223	0.268271	0.568889
Bacteroidia	0.0889305	0.325551	0.576105	0.583705	0.289883	0.497348
Bathyarchaeia	0	0	6.15656e-06	0	2.2669e-05	0
Bdellovibrionia	0.0195709	0.0124098	0.00418553	0.00486129	0.00545927	0.00333809
Blastocatellia	0.00788084	6.26568e-05	0.000421425	0.000273085	0.00522176	0.000228146
Brevinematia	0	0	6.15656e-06	1.19488e-05	0.000138901	2.42839e-05
Brocadiae	0	0	0	0	5.08173e-06	0
Caldatribacteriia	0	6.16221e-06	9.96254e-05	6.8073e-05	0	0
Caldisericia	0	0	6.60165e-06	0	5.78296e-05	9.93448e-05
Calditrichia	0	0.002938	0.0149768	0.0146713	0	0.000145981
Campylobacteria	7.80808e-05	0.011593	0.0416001	0.0414892	0.0129164	0.0153352
Chitinivibrionia	0	0	4.14238e-05	4.39549e-05	0	0
Chlamydiae	7.23382e-05	3.85778e-05	3.19697e-05	1.19473e-05	0.00172629	5.05586e-05
Chlorobia	0	0	1.10027e-05	0	0	0
Chloroflexia	0.00430708	0.00286981	0.00171044	0.00173446	0.00453614	0.00411181
Chrysiogenetes	0	0	1.02609e-05	0	0	0
Chthonomonadetes	0	0	0	0	0.000324783	0
Cloacimonadia	0	0.00357742	0.0119266	0.0111677	0.000132562	4.77819e-05
Clostridia	0.0054883	0.226872	0.579678	0.586446	0.421679	0.870983
Coprothermobacteria	0	7.02645e-06	6.60165e-06	1.19535e-05	0	0
Coriobacteriia	0.000101596	0.000265218	0.000811206	0.000388686	0.0156409	0.00412058
Cyanobacteriia	0.000500036	8.05298e-05	0.000394686	0.000263466	0.00102032	0.000382438
Dadabacteriia	0	0.000309774	0.000982664	0.00097631	0.000498238	0.00019393
Deep_Sea_Euryarchaeotic_Group_DSEG	0	0	0	0	5.7593e-05	1.82129e-05
Deferribacteres	0	0.00102667	0.00168516	0.00131811	0.00118608	0.00172909
Defferrisomatia	0	0	5.35301e-05	1.49419e-05	0	7.19406e-05
Dehalococcoidia	0.00220673	0.00113074	0.000849258	0.000738845	0.00338433	0.00139608
Deinococci	0.00043107	0.00080706	0.000494016	0.000354171	0.000571199	0.000293488
Desulfarculia	0	0	0	0	0	1.51359e-05
Desulfitobacteriia	1.32893e-05	1.43785e-05	0.000244814	0.000204172	0.000146476	7.21822e-05
Desulfobaccia	0	5.045e-05	0.000217177	0.000232155	1.89322e-05	0.000316234
Desulfobacteria	0	2.97478e-05	0.000250395	0.000223157	0.000767949	0.00337078
Desulfobulbia	2.32563e-05	0.000202193	0.000954922	0.000864929	0.000698408	0.00338418
Desulfomonilia	0	6.16221e-06	0	0	2.66913e-05	2.69686e-05
Desulfotomaculia	0	0.000367869	0.00109446	0.00130147	1.69391e-05	5.94639e-05
Desulfovibrionia	0.000227752	0.00622458	0.0205522	0.0208388	0.00717896	0.02676
Desulfuromonadia	0.000167512	0.00112531	0.0052299	0.00501234	0.00255485	0.00513766
Dethiobacteria	0	7.74035e-05	0.000268388	0.000215704	0	0
Elusimicrobia	0.000470688	1.03556e-05	0.000240378	0.000159394	0.00177041	0.000184211
Endomicrobia	9.05538e-05	0	2.73011e-05	0	1.06765e-05	0
Entotheonellia	0.00082464	0.0025804	0.000703806	0.000566497	0.000590936	0.000324187
Fibrobacteria	0.000103019	0.000933889	0.000787455	0.000796471	0.000880584	0.00106613
Fimbriimonadia	0.000501138	0.000217399	0.000120799	0.000201618	0.000153479	0.000113326
Fusobacteriia	4.07096e-05	0.00786383	0.0380776	0.0333539	0.024779	0.0230756
Gammaproteobacteria	0.414146	0.692036	0.510005	0.495519	0.682752	0.413574
Gemmatimonadetes	0.0522553	0.211926	0.0272549	0.0268966	0.0413354	0.0269787
Gracilibacteria	0	0.000862298	0.00315818	0.00283861	0.000179542	0.000266874
Halanaerobiia	0	0	0	0	0	0.000253401
Holophagae	0.00313054	0.00856893	0.0043437	0.0037809	0.00542989	0.00210345
Hydrogenedentia	0	0.000105879	0.000264464	0.000294467	0	0.000363056
Ignavibacteria	0	0.000522801	0.00119771	0.00124414	0.00357002	0.000917909
Incertae_Sedis	0	0.000321934	0.00143088	0.0015284	0.000254087	0
Kapabacteria	4.02298e-05	0.00290772	0.00211897	0.00208521	0.000215653	0.000699702
Kiritimatiellae	2.48792e-05	0.000351721	0.00129749	0.000963947	0.000812743	0.00425775
Kryptonia	0	0.000104893	0.000244566	0.000328357	0.000642754	0.000649346
Ktedonobacteria	0.000176207	0.000100286	0.000327184	0.000352886	0.00871915	0.00138242
Latescibacteria	7.97198e-05	0	3.13763e-05	0	0.000884823	0.000103492
Lentisphaeria	0	6.06479e-05	0.000369938	0.000606688	0.000435942	0.000178508
Leptospirae	0	3.92805e-05	0.00025489	0.000227231	8.13077e-05	7.84793e-05
Leptospirillia	0	0.000473297	0.00111206	0.00107367	0.000823325	6.26507e-05
Limnochordia	4.36554e-05	0.00376154	0.000847862	0.000708769	0.000773535	0.000696433
Longimicrobia	0.00823341	0.01422	0.00311753	0.00267016	0.00112231	0.00290999
Methanomicrobia	0	0	0	0	0	4.9898e-05
Methylomirabilia	0.031798	0.0511616	0.0130852	0.0133905	0.0120806	0.00632215
Microgenomatia	0	0	0	0	0.000250899	0
Moduliflexia	0	0	0	0	0	0.000114104
Moorellia	0	5.34059e-05	0.000247002	0.000141012	0	3.57741e-05
Myxococcia	0.00935502	0.0231767	0.0109465	0.0111358	0.00859042	0.00391417
Nanoarchaeia	0	6.16221e-06	8.20875e-06	0	0.0012969	0.000191562
Negativicutes	0.00061269	0.0032131	0.0109295	0.010959	0.0392302	0.0133454
Nitrososphaeria	9.96698e-06	7.76669e-06	0	0	5.08173e-06	0
Nitrospinia	0	0	0	0	0	1.21752e-05
Nitrospiria	0.00389827	0.168333	0.00891628	0.00885415	0.0126175	0.0065233
Oligoflexia	0.00263111	0.00298857	0.00168649	0.00119546	0.003466	0.00100307
Omnitrophia	1.9934e-05	6.16221e-06	5.93278e-05	2.02652e-05	0.000148001	2.13066e-05
Parcubacteria	8.30436e-05	8.59104e-05	0.000184228	0.000104753	0.00215833	0.000299417
Phycisphaerae	0.000886311	0.012287	0.00205181	0.00253773	0.00361439	0.00374293
Planctomycetes	0.000686491	0.000293059	0.000116959	0.000100922	0.00427336	0.000203447
Polyangia	0.0378978	0.076582	0.0181217	0.0170977	0.0272299	0.0136499
Rhodothermia	9.83323e-05	0.00647294	0.00200757	0.00217684	0.00125609	0.0017581
Rubrobacteria	0.000589969	0.000404229	8.53515e-05	8.3021e-05	0.000319755	0.000221415
Saccharimonadia	0.0651723	0.0138547	0.0186842	0.0174152	0.0195552	0.0158216
Spirochaetia	9.96698e-06	0.000505413	0.00169525	0.00185665	0.00454713	0.00259436
Sulfobacillia	0	0.000105521	0.000386765	0.000393409	0	0
Sumerlaeia	0.000206708	1.14227e-05	0.00014444	3.28675e-05	0.000142097	0.00023442
Symbiobacteriia	1.9934e-05	0	2.06067e-05	0	0.000552215	2.38073e-05
Synergistia	0	0.000728784	0.00248012	0.00212872	5.56084e-05	0.000495011
Syntrophia	1.87158e-05	8.21629e-06	0.000147587	0.000135519	0.000404055	0.000117407
Syntrophobacteria	1.06625e-05	7.52344e-05	0.00034044	0.000282934	0.000257835	0.000744144
Syntrophomonadia	0	0.00532789	0.0201076	0.019583	0.000293816	0.00013143
Syntrophorhabdia	0	1.31887e-05	0.000129152	8.21487e-05	0	6.58773e-05
Thermacetogenia	0	0.000134858	0.000221577	0.00031301	0	0
Thermoanaerobacteria	0	1.26125e-05	4.61867e-05	5.18412e-05	0.000217968	0
Thermoanaerobaculia	0.00343409	0.0185994	0.00248919	0.00242018	0.00350227	0.00519819
Thermodesulfovibrionia	2.32563e-05	0.000131357	0.000988601	0.00117561	0.00259634	0.00169897
Thermoleophilia	0.0307617	0.00985495	0.00708755	0.00660208	0.0148002	0.00668009
Thermoplasmata	1.9934e-05	0	0	0	0	0
Thermotogae	4.31902e-05	2.11608e-05	0.000215215	0.000135044	0.000115186	3.02717e-06
Thermovenabulia	0	2.81058e-05	0.000159933	0.000142517	0	0
Unassigned	0	0.00016746	0.000110807	9.47402e-05	0.0452027	0.0168133
Vampirivibrionia	0.000104008	9.3686e-06	6.94126e-05	1.13047e-05	0.000738485	0.000334089
Verrucomicrobiae	0.00984773	0.000927079	0.00108609	0.000858097	0.0240598	0.00119637
Vicinamibacteria	0.122047	0.000393473	0.00217214	0.00133336	0.0335105	0.00250283
Zetaproteobacteria	0	0	0	0	0	1.8163e-05
unclassified_Acidobacteriota	1.49726e-05	4.36366e-05	6.58725e-05	5.54525e-05	0.000464792	2.42673e-05
unclassified_Actinobacteriota	0.0036009	0.000426653	0.000539718	0.000507186	0.0012018	0.000816858
unclassified_Aenigmarchaeota	0	0	0	0	0	1.82628e-05
unclassified_Archaea	0	2.46489e-05	1.17752e-05	2.90114e-05	0.0125631	0.000601279
unclassified_Armatimonadota	0	0	0	0	0.000182942	0
unclassified_Bacteria	0.884317	0.0473848	0.0252192	0.0230261	0.154888	0.0488396
unclassified_Bacteroidota	0	2.08288e-05	1.98049e-05	1.66358e-05	0	0
unclassified_Bdellovibrionota	0	4.6843e-06	7.74438e-05	0.000100915	0.000480682	9.67266e-05
unclassified_Chloroflexi	0.00334192	0.00203224	0.000634193	0.000597015	0.00342154	0.000603049
unclassified_Desulfobacterota	0.000402035	0.0019768	0.000342049	0.000299966	0.000362199	0.000285503
unclassified_Elusimicrobiota	0	0	0	0	4.74295e-05	0
unclassified_Firmicutes	0	0.000529398	0.00201508	0.00145794	0.00246339	0.00209935
unclassified_Gemmatimonadota	0.00571411	0.0312239	0.00116165	0.00103271	0.00157822	0.00305993
unclassified_Myxococcota	0.00198775	0.0118156	0.000354661	0.000299325	0.000179608	0.000412265
unclassified_Patescibacteria	0	0	6.60165e-06	0	0	0
unclassified_Planctomycetota	1.66116e-05	0.000370003	8.8022e-06	2.98838e-05	9.34537e-05	0
unclassified_Proteobacteria	5.3751e-05	0.000961807	0.00353021	0.00278317	0.000832392	0.00156761
unclassified_Spirochaetota	0	0	0	0	1.06765e-05	0
unclassified_Verrucomicrobiota	9.96698e-06	0.000255078	5.05878e-05	1.49341e-05	0.000238896	1.5219e-05
Note: fillter conditions: Minimum count = 1; Prevalence in samples > 10%
Low count filter - features with very small counts in very few samples are likely due to sequencing errors or low-level contaminations.

## Sheet: Table S4-2
Table S4-2. Taxonomic composition of bacterial communities under different microhabitats at the genus level
Compartment-Class	Rhizo	Root	Stem	Leaf	Seed-P	Seed
1174_901_12	0	0.000168434	3.52672e-05	3.47818e-05	0.000302777	0.000419301
1921_2	0	0	0	0	0.000182247	0
1921_3	0	0	0	0	0	9.13139e-06
1959_1	0	0	0	0	6.57147e-05	0
2013Ark19i	0	8.42169e-05	1.91201e-05	0	0	7.84205e-05
28_YEA_48	5.33127e-05	1.03556e-05	1.64175e-05	1.79303e-05	0	0
966_1	0	0	0	1.94084e-05	0	3.0438e-05
A2	0	0.000104194	0.000475671	0.000374268	0.00117662	0.000491408
ADurb.Bin063_1	7.48632e-06	8.21629e-06	6.8187e-05	0	0.00229869	4.16356e-05
ADurb.Bin063_2	0	4.6719e-05	0.00010203	0.000323703	0	0
ADurb.Bin120	0	0	8.83143e-06	0	0	0
AKYG587	0.000145456	0.00201684	0.000398999	0.000234707	0.000215518	0.000141338
ASF356	0	0.000204288	0.000746301	0.000608455	0.000158369	0.000560648
AUTHM297	0	0	0	0	0.000115186	0
Abditibacterium	0	4.10503e-05	0	0	0.000101977	1.8163e-05
Abiotrophia	0	3.51698e-05	0.000111668	3.32715e-05	0.000933433	0.000174897
Acanthopleuribacter	0	0	0	0	2.37147e-05	1.21752e-05
Acetatifactor	0	0.000429261	0.00104492	0.000954197	8.77945e-05	0.000534635
Acetitomaculum	4.86611e-05	0.000133201	0.000197674	0.000147211	0	0.00243134
Acetivibrio	0	0	1.76629e-05	1.49419e-05	0	0
Acetoanaerobium	1.77709e-05	6.16221e-06	0	8.96513e-06	0.0010986	0.000124013
Acetobacter	0	0.000838644	0.00284622	0.00242369	0.00272166	0.00187777
Acetobacterium	0	0.000319104	0.000711463	0.000701956	0	8.80553e-06
Acetobacteroides	0	0.000150708	0.000621003	0.000694256	0	5.71394e-05
Acetomicrobium	0	9.22469e-05	0.000222379	0.000284876	0	0
Acholeplasma	0	0.00373385	0.0127846	0.0136918	0	0.000162654
Achromobacter	0.00277692	0.0096151	0.0121293	0.0115308	0.00145578	0.014729
Acidaminobacter	0	6.16221e-06	5.88827e-05	5.07946e-05	0	3.88013e-05
Acidaminococcus	0	0.00019403	0.000389689	0.000441198	0.000356809	0
Acidibacter	0.0100392	0.0234754	0.00269181	0.00267032	0.0228217	0.00207106
Acidicaldus	0	0	1.02609e-05	2.98838e-05	0.000778358	0
Acidicapsa	0	0	0	0	0.00016349	0
Acidiphilium	0	1.02704e-05	6.92906e-05	1.94084e-05	0.000247164	5.47883e-05
Acidipila_Silvibacterium	0	0	0	0	0.00763128	0
Acidisoma	0	0	2.93796e-05	3.71151e-05	0.000183595	3.94696e-05
Acidithiobacillus	0	2.41993e-05	0.000125554	0.00017197	0.00198929	0
Acidobacteria_bacterium_LWQ13	0	0	0	0	0.000190966	0
Acidobacteria_bacterium_SCN_69_37	0	0	0	0	0	3.34319e-05
Acidobacteria_bacterium_WX27	0.000999281	0	0	0	2.61565e-05	0
Acidocella	0	1.55334e-05	0	1.19473e-05	0.000976866	0
Acidothermus	0	0.000158398	0.000347725	0.000354207	0.0165344	0.00100862
Acidovorax	0.000726307	0.000722028	0.000303355	0.00016107	0.00123475	0.000865946
Acinetobacter	0.0041396	0.00135865	0.0033745	0.00269144	0.00626065	0.00552956
Actibacter	0	0	0	0	0	6.62032e-05
Actibacterium	0	2.81058e-05	0	3.28721e-05	0	1.17407e-05
Actinoallomurus	0	0	0	0	0.000123807	5.33763e-05
Actinobacillus	9.96698e-06	0.00046509	0.00172299	0.00196392	0.00109251	0.000523127
Actinocorallia	0.000104961	9.3686e-06	0	0	0	6.45739e-05
Actinomadura	9.31552e-05	0.00667562	0.00367232	0.00363692	0.000263024	0.000215004
Actinomyces	0	0.00233551	0.00965229	0.00923288	0.00128759	0.000626182
Actinomycetospora	0	0	0	0	0	2.97198e-05
Actinophytocola	3.9096e-05	6.09334e-05	0	1.38631e-05	9.99407e-05	0
Actinoplanes	0.00177879	0	0	0	0	1.8163e-05
Actinopolymorpha	0	0	0	0	0	1.17407e-05
Actinopolyspora	0	0	0	0	0	2.73942e-05
Actinospica	0	0	2.20055e-05	0	0.00206806	9.39654e-05
Actinotignum	0	0	2.35212e-05	2.30378e-05	0	0
Acuticoccus	0	0	7.04176e-05	2.68954e-05	0	0
Adhaeribacter	0.000830721	0.00130194	0.000232583	0.000215695	0.000367047	0.000210068
Adlercreutzia	0	0	0	0	0.000379017	3.26128e-05
Advenella	0	3.0448e-05	2.36126e-05	5.99387e-05	0	0.000134525
Aequorivita	0	0.000347223	0.000134269	0.000278637	0.00047378	5.94639e-05
Aeriscardovia	0.000132527	3.11882e-05	0.000114224	0.000128226	0	0.00102692
Aerococcus	4.26501e-05	0.00154084	0.0036176	0.00392672	0.000927341	0.00204354
Aeromicrobium	0.00368112	0.000111997	0.000321021	0.000229546	9.06759e-05	2.64166e-05
Aeromonas	0.000344348	0.000433238	0.000895925	0.000660334	0.00648442	0.00291325
Aerosphaera	0	0.000208977	0.000418738	0.000353306	0	9.95775e-05
Aestuariibacter	0	3.28651e-05	8.86519e-05	0.000126297	0	0.00137423
Aestuariibaculum	0	0	1.54038e-05	0	0	0
Aestuariicella	0	0	0	0	0	1.21087e-05
Aestuariicoccus	0	0.000119136	0	0	0	0
Aetherobacter	0	0	2.4206e-05	0	0.000104626	0
Afifella	0	0	0	0	0	1.46759e-05
Afipia	0	0	8.8022e-06	0	0	0
Agaricicola	0	0.00010318	0	0	0	2.64166e-05
Agathobacter	4.11748e-05	0.000744	0.00122561	0.00169024	0.00945871	0.00153917
Aggregatibacter	0	0.000654798	0.00264153	0.00284146	0.000140574	0.000343328
Agrilactobacillus	0	0	0	8.31788e-06	0	0
Agromyces	0.00156438	0.000403779	0.000215303	0.000160455	0.000687961	0.000441484
Ahniella	0.000502992	0.00180451	0.000234244	0.000327529	0.000712527	0.000426583
Ahrensia	0	0	0	0	0	6.30508e-05
Akkermansia	2.48792e-05	0.000101694	0.000257765	0.000336023	0.000597215	0.00061624
Alcaligenes	9.96698e-06	1.23244e-05	8.2404e-05	4.33107e-05	1.52452e-05	0.00040229
Alcanivorax	0	0.000266507	0.000374972	0.000232771	1.01635e-05	0.000563172
Algibacter	0	0	0	0	0	9.08152e-06
Algimonas	0	0	0	0	0	7.63146e-05
Algiphilus	0	4.51896e-05	0	0	0	0
Algivirga	0	0	8.8022e-06	0	0	0
Algoriphagus	0.00470576	4.72436e-05	0	3.39141e-05	0.000509982	0.000105238
Alicyclobacillus	0	0.000116975	0.000303091	0.000256051	0.000473326	3.0438e-06
Aliicoccus	0	0	4.30959e-05	0	3.83629e-05	0
Aliidiomarina	0	0.000340976	7.0096e-05	2.2181e-05	0.000663919	9.08152e-06
Aliifodinibius	0	0	0	0	5.08173e-06	9.13139e-06
Aliihoeflea	0	0.000301873	0.000254231	3.2855e-05	0	9.9888e-05
Aliikangiella	0	7.02645e-06	8.83143e-06	2.64639e-05	0	2.05462e-05
Alishewanella	0	1.23244e-05	4.60383e-05	3.88411e-05	0	3.86173e-05
Alistipes	0.000102668	0.0139737	0.0366744	0.0377477	0.0165056	0.0240538
Aliterella	0	0	6.60165e-06	0	0	0
Alkalibacterium	0	6.01506e-05	0.000113176	7.33734e-05	0	9.55727e-05
Alkalibaculum_bacchi	0	0.000270571	0.001326	0.00136824	0	0
Alkaliflexus	0	0	5.37106e-05	8.31788e-06	0	8.74688e-05
Alkalimarinus	0	0	0	0	0	9.72519e-05
Alkanibacter	0	2.05407e-05	3.11365e-05	5.59068e-05	0	2.73277e-05
Alkanindiges	0	0	0	0	0.000194217	2.12401e-05
Allisonella	0	2.25948e-05	5.66544e-05	9.98663e-05	0.00424774	8.80553e-06
Allobaculum	3.55418e-05	0.000264909	0.000492258	0.000413259	0.0228116	0.0046185
Allocatelliglobosispora	0	0	0	0	0	3.95694e-05
Allokutzneria	0	6.16221e-06	0	0	0	0
Alloprevotella	0.000191256	0.0068892	0.015707	0.0172262	0.012085	0.0267155
Allorhizobium_Neorhizobium_Pararhizobium_Rhizobium	0.132677	0.0245899	0.00496538	0.00446498	0.0335684	0.0211719
Alloscardovia	0	1.17108e-05	2.90844e-05	2.98744e-05	1.60148e-05	0
Alphaproteobacteria_bacterium	3.17558e-05	4.51896e-05	0	0	1.2456e-05	6.06931e-05
Alsobacter	0	1.84866e-05	0	0	0.000394091	0.000601082
Altererythrobacter	0.0101324	0.00899178	0.000917569	0.000846632	0.000903683	0.00189063
Alteromonas	0	5.71884e-05	0.000121093	0.000116932	0.000249119	0.00238886
Alysiella	0	0	7.79152e-05	8.23458e-05	0.000199881	0
Amaricoccus	0.000958328	0.00328622	0.000196274	0.000163209	0.00225346	0.000437332
Aminiphilus	0	0	0	0	0	1.17407e-05
Aminobacter	0	0.00075189	0.000525669	0.000563008	0.00111371	9.32715e-05
Aminobacterium	0	3.70585e-05	0.00016228	9.98492e-05	4.01066e-05	0
Ammoniibacillus	0	7.80547e-05	2.34642e-05	0	0.000527383	0.000156091
Ammoniphilus	4.77162e-05	8.46431e-05	8.8022e-06	1.74988e-05	0.00040037	8.18833e-05
Amnipila	0	0.000148659	0.000480757	0.000459384	0	0.000302028
Amphibacillus	0	1.84866e-05	0	0	0.000401066	0
Amphiplicatus	2.62021e-05	0.000100175	0	8.31788e-06	0.000484019	0.000154625
Amphritea	0	0	0	0	0	2.11902e-05
Amycolatopsis	0	1.64326e-05	0.000152827	0.000197978	1.69391e-05	0.000104997
Anaerobacterium	0	0	0	0	0	4.19614e-05
Anaerobiospirillum	0	0.000225946	0.00109192	0.00102625	0.000481071	0.000452876
Anaerocella	0	1.43785e-05	0.000106671	0.000155747	0	0
Anaerococcus	0	0.000930005	0.00315445	0.00328936	0.0017516	0.000913926
Anaerocolumna	0	0	0	1.19535e-05	0	1.76111e-05
Anaerofilum	0	0	0	1.49419e-05	6.45194e-05	0
Anaerofustis	1.42167e-05	4.63044e-05	0.000117763	0.000119478	1.77942e-06	0.000145771
Anaerolinea	0	0	0	0	0.00100302	6.07596e-05
Anaeromyxobacter	0	0.000736561	0.00249903	0.00236141	0.0013498	0.0010792
Anaerophaga	0	0	0	0	0	1.51359e-05
Anaeroplasma	6.68099e-05	0.000435355	0.00133814	0.0010683	0.000167899	0.00520601
Anaerosalibacter	0	0.000155933	0.000318676	0.00038616	0	3.26549e-05
Anaerosolibacter	0	0	0	0	0	1.21087e-05
Anaerosporobacter	0	8.55086e-05	0.000172484	0.000198239	0	0.000126931
Anaerostignum	0	0	4.99943e-05	5.31249e-05	0	5.47219e-05
Anaerostipes	0	0.000372976	0.000640423	0.000660578	0.00297322	0.000786334
Anaerotruncus	5.31572e-05	0.000763645	0.000872923	0.00111907	0.000239395	0.002679
Anaerovibrio	0	0.000374282	0.0006722	0.000896909	7.86835e-05	0.00197302
Anaerovorax	0	0.000852914	0.0029383	0.00320805	0.000177861	0.00308236
Ancalomicrobium	0	6.16221e-06	1.4988e-05	0	0	4.5657e-05
Ancylobacter	0	0	0	0	0.000873776	0
Anderseniella	0	0	3.00659e-05	8.96047e-06	0	9.08817e-05
Aneurinibacillus	0	6.16221e-06	0	0	0	0
Anoxybacillus	0	0	0	0	0	9.17508e-05
Anseongella	0	0.000205407	1.23131e-05	2.58166e-05	0	0
Antarctobacter	0	0	0	0	0	4.87008e-05
Antricoccus	0	1.64326e-05	0	8.96513e-06	0	0
Apibacter	0	1.17108e-05	4.17856e-05	5.54525e-06	0	2.98949e-05
Aquabacterium	0	9.16294e-05	0.000170303	3.88168e-05	0.0026205	0.0005018
Aquamicrobium	0	0	8.20875e-06	0	0	0.000141255
Aquaspirillum	0	0	0	8.31788e-06	0	0
Aquibacillus	0	0	0	0	0	1.76111e-05
Aquibacter	0	8.21629e-06	1.4719e-05	1.19473e-05	0	2.73942e-05
Aquicella	0.00283703	0.00115888	0.00141081	0.00108364	0.0029927	0.000465268
Aquimarina	0	1.91067e-05	6.0218e-05	2.58166e-05	0	0
Aquimixticola	0	0	0	1.19473e-05	0	0
Aquimonas	0	0	4.13975e-05	3.32715e-05	0	0.000140554
Aquipuribacter	5.24042e-05	0	0	0	0	0
Aquisphaera	0	0	0	0	0.000298943	0
Aquitalea	0	0	0	0	0	2.05462e-05
Arachidicoccus	0	0	0	0	0.000398575	2.64166e-05
Arcanobacterium	0	0	2.37902e-05	2.98744e-05	0	0
Archangium	2.99009e-05	0.000141185	1.76629e-05	1.94084e-05	0	0
Arcicella	0	6.16221e-06	0	0	0.000339532	1.46759e-05
Arcobacter	0	0.000164761	0.000723768	0.000677822	0	0.00017799
Arcticibacter	0.000539783	6.10148e-05	7.24449e-05	2.98682e-05	0	6.53764e-05
Arenibacter	0	4.65925e-05	6.02472e-05	9.38849e-05	2.03269e-05	0.00248629
Arenicella	0	0	8.8022e-06	1.7283e-05	0	3.02717e-05
Arenimonas	0.0112812	0.0096854	0.00263924	0.00259599	0.00183498	0.00240665
Aridibacter	0.000213783	0	0	0	0.000201075	0
Armatimonadetes_bacterium	0	6.16221e-06	6.15656e-06	0	0	0
Arsenicibacter	2.32563e-05	0	6.15656e-06	0	0	0
Arsenicicoccus	0	0	0	0	1.42354e-05	0
Arsenophonus	0.000452224	0.000198414	0.000640118	0.0086583	0	0
Arthrobacter	0.000678848	0	0	0	0.00113984	0.000139682
Asaia	0	4.63044e-05	0.000238772	0.000221249	0.00152529	0
Ascidiaceihabitans	0	0	0.00016953	0	7.47358e-05	0.000187357
Asteroleplasma	0	0	0	0	0	1.46759e-05
Asticcacaulis	0.000638279	0.000259026	0.000753206	0.000953571	0.00155374	0.00029364
Atopobium	0	2.00911e-05	0.000193329	0.000125236	0.000433221	0
Atopostipes	0	4.54401e-05	0.000286652	0.000271172	6.77564e-06	0.000469574
Aurantimicrobium	0	1.03556e-05	0	0	0	0.000500673
Aurantisolimonas	0	8.99862e-05	0.000481347	0.000598506	0	9.13139e-06
Aurantivirga	0	0	0	1.38631e-05	0	4.84348e-05
Aureimarina	0	0	0.000323159	0	0	0
Aureimonas	0.000119781	0.000217479	0.000699019	0.000769636	0	0.000826967
Aureispira	0	0	0	1.66358e-05	0	0.00010298
Auricoccus_Abyssicoccus	0	0	0	0	0	2.11902e-05
Azoarcus	0	0.00199147	0.00211382	0.00230876	0.00129703	0.00114901
Azohydromonas	0.00098598	0.000719691	8.42771e-05	5.07884e-05	0.000392987	2.93518e-05
Azonexus	0	0	0	0	0.000207508	0
Azorhizobium	0	0	1.23131e-05	4.97112e-05	0	0
Azospira	0	7.68713e-05	0.000320648	0.000344561	0	0.000367563
Azospirillum	4.65126e-05	2.84779e-05	0.000237186	0.000252363	0.000101745	0.000339474
Azospirillum_sp._47_25	0	3.31157e-05	0.000155416	0.000149151	0	5.31092e-05
Azotobacter	0	0.000239148	0	0	0.000123912	0
Azovibrio	0	2.25573e-05	0.000122055	6.4234e-05	0	4.14183e-05
B276_D12	0	0.00216573	4.35345e-05	5.26799e-05	7.26835e-05	0.000126202
BD1_7_clade	0.000140684	7.71244e-05	0.000338184	0.000231255	0.000439429	0.000211932
BIyi10	0.000126511	0.00018876	0.000108811	0.000111166	0	0.000110249
BRH_c57	0	0	0	0	0	6.56601e-05
BSV13	0	9.99246e-05	0.000496182	0.000477956	0	0.000145403
BacC_u_018	0	0	0	0	0.000122634	0
Bacillaceae_bacterium_BM62	0	6.27745e-05	8.20875e-06	2.2181e-05	0	0.000102254
Bacillus	0.00384415	0.0196919	0.0171124	0.0167561	0.0821371	0.308823
Bact_08	0	0	6.15656e-06	0	0	1.17407e-05
Bacteriovorax	0	2.00911e-05	3.41703e-05	6.89116e-05	0	9.84492e-05
Bacteroidales_bacterium_Bact_22	0	0.000102704	4.41279e-05	2.09078e-05	3.83629e-05	0.00131125
Bacteroides	0.000583927	0.0179739	0.0436181	0.0422931	0.0467529	0.030927
Bacteroidetes_bacterium_37_13	0	0	0	0	6.77564e-06	0
Bacteroidetes_bacterium_OLB10	0	0	6.8464e-05	0	0	0.000108475
Bacteroidetes_bacterium_UKL13_3	0	0	3.81818e-05	0	0.00050918	0
Bacteroidia_bacterium_feline_oral_taxon_141	0	0	1.23131e-05	0	0	0
Barnesiella	3.74316e-05	5.35763e-05	6.46483e-05	0.000133979	0.000722711	9.88338e-05
Bartonella	0	0.00013116	0.00168394	0.00173807	0	3.81573e-05
Bauldia	0.000434253	0.00105716	0.000720661	0.000584858	0.00129916	0.000686631
Bavariicoccus	0	0	0	0	0	4.85512e-05
Bdellovibrio	0.00807193	0.00554666	0.00259317	0.00295109	0.00422861	0.00130825
Belliella	0	0	0	0	0	1.46759e-05
Belnapia	0	0	6.15656e-06	0	0	1.21087e-05
Bergeyella	1.66116e-05	0.000684454	0.00237521	0.00232008	3.91473e-05	1.17407e-05
Bhargavaea	0	0	0	0	0	1.21752e-05
Bibersteinia	0	0	0.000104292	7.76517e-05	0	0
Bifidobacterium	0.000237195	0.00105916	0.00234473	0.00232005	0.00605909	0.00577788
Bilophila	0	0.000320272	0.000887069	0.00114832	0.000453812	0.00161635
Bisgaardia	0	0	0	0	0	1.51359e-05
Blastocatella	0	0	0	0	0.000486152	0
Blastochloris	0	0	0	0	0	1.21752e-05
Blastococcus	0.00508807	0.000777054	0.000278476	0.000126099	4.70817e-05	0.000483392
Blastomonas	0	0	0	0	0.000219715	5.17446e-05
Blastopirellula	0	7.39466e-05	0	0	0	0
Blattabacterium	0	0	0	0	1.69391e-05	0
Blautia	0.000208761	0.00647942	0.0151259	0.0157279	0.0106198	0.0316803
Blvii28_wastewater_sludge_group	0	0.000306128	0.000946168	0.000960081	0	9.65669e-05
Bombella	0	0	0	2.49536e-05	0	0
Bombilactobacillus	0	0	1.02609e-05	3.15699e-05	0	1.17407e-05
Bordetella	3.65456e-05	0.000396333	4.00871e-05	7.23253e-05	0.000128737	0.000217487
Bosea	0.00998945	0.00253914	0.000810931	0.000828239	0.00060456	0.00156659
Boseongicola	0	0	0	5.48374e-05	0.000215525	2.43504e-05
Bounagaea	0	0	0	0	0	3.32989e-05
Brachybacterium	0.00545754	0	4.99278e-05	4.71346e-05	0.000466795	0
Brachymonas	0	0	1.23131e-05	2.68814e-05	0	0
Bradymonas	0	0	0	0	0	1.21087e-05
Bradyrhizobium	0.00652367	0.00235715	0.00372535	0.00375321	0.0127665	0.00491554
Brevibacillus	2.7506e-05	1.52427e-05	3.40789e-05	0	0.000581109	0.000191779
Brevibacterium	0.000120842	1.84866e-05	4.43413e-05	1.49419e-05	0.00104615	0.000708942
Brevinema	0	0	6.15656e-06	1.19488e-05	0.000138901	2.42839e-05
Brevundimonas	0.00642015	0.0046803	0.00150121	0.00124558	0.00906057	0.00626548
Breznakia	0	0	0	0	0	3.60412e-05
Brochothrix	0	0	1.32033e-05	0	0	3.02717e-05
Brumimicrobium	0	0.00059314	9.40944e-05	8.64088e-05	1.52452e-05	8.40991e-05
Bryobacter	0.00225914	0.0323269	0.00648697	0.00636497	0.0229767	0.00528503
Bryocella	0	0	0	0	1.2456e-05	0
Buchnera	0.014746	0.00626709	0.0184756	0.0264662	0.00177918	0.000117959
Bulleidia	0	0	2.35505e-05	1.10905e-05	0	0
Burkholderia_Caballeronia_Paraburkholderia	2.41837e-05	0.00131934	0.00379951	0.00417035	0.0246429	0.00134855
Butyricicoccus	3.9096e-05	0.000403601	0.00140552	0.00130384	0.00131517	0.000980704
Butyricimonas	0	0.000174365	0.000250067	0.000181801	0.000602485	0.000861535
Butyrivibrio	0	0.000191288	0.000589585	0.000514005	0.000186583	0.0117505
Byssovorax	0	0	1.76044e-05	0	0	0
C1_B045	0	0.000402598	9.48626e-05	0.000109231	0	0.00018774
C39	0	2.05407e-05	1.84697e-05	1.49341e-05	0	0
CAG_352	0	0.000399757	0.00132522	0.00167119	0	0.000132416
CAG_56	0	0	2.52197e-05	0	0.00027759	9.66999e-05
CHKCI001	0	5.65372e-05	0.000145179	9.68505e-05	0.000489341	0.000200452
CK06_06_Mud_MAS4B_21	0	0	7.04818e-06	2.98838e-06	0	0
CL500_29_marine_group	0.000337682	0.00298184	0.000674077	0.000612558	0.00304425	0.000723242
CL500_3	0	2.69974e-05	1.4988e-05	3.39141e-05	2.44127e-05	7.13132e-05
Caedibacter	0.000123461	0	0	0	0	0
Caenimonas	0.00412663	0.00261808	0.000352007	0.000387424	0.000546558	0.00028242
Caenispirillum	0	0	0	0	0	1.17407e-05
Caldalkalibacillus	0	1.64326e-05	0	0	0	3.86173e-05
Caldicoprobacter	0	0.000262744	0.000747854	0.000660764	0.000394681	0.00287335
Caldisericum	0	0	0	0	0	9.93448e-05
Calorithrix	0	0.00216441	0.0113633	0.0111524	0	2.34814e-05
Camelimonas	8.84671e-05	6.41036e-05	2.25741e-05	0	0	0.00013464
Campylobacter	9.96698e-06	0.00276679	0.0103516	0.0105462	0.00194254	0.00101812
Candidatus_Accumulibacter	0	0	0	0	0	9.24624e-05
Candidatus_Actinomarina	0	0	0	0	0.000819063	1.17407e-05
Candidatus_Alysiosphaera	0.000293868	0.000549945	0.000906958	0.00127294	0.000148612	0.000505227
Candidatus_Aquiluna	0	0	0.000138635	1.19535e-05	0.000345672	0.0019252
Candidatus_Arthromitus	0	8.82939e-05	0.000184671	0.00015768	0.000716271	0.000352418
Candidatus_Bacilloplasma	0	1.70087e-05	1.76044e-05	8.31788e-06	0.00333744	1.76111e-05
Candidatus_Berkiella	0.000474081	0.000336999	0.000408068	0.000353931	0.00105386	0.000172979
Candidatus_Blochmannia	0	9.44873e-05	5.31143e-05	3.32715e-05	0.00161538	0
Candidatus_Brocadia	0	0	0	0	5.08173e-06	0
Candidatus_Caldatribacterium	0	6.16221e-06	9.96254e-05	6.8073e-05	0	0
Candidatus_Captivus	7.67165e-05	8.00014e-05	1.32033e-05	3.5637e-05	0.000428841	5.16947e-05
Candidatus_Cardinium	0	0.000425188	0.00147111	0.00162316	0	0
Candidatus_Carsonella	1.49726e-05	0	0	0	0	0
Candidatus_Chloroploca	9.1807e-05	0	0	0	0	1.21087e-05
Candidatus_Cloacimonas	0	1.47931e-05	0.0001963	7.89415e-05	0	4.77819e-05
Candidatus_Competibacter	0	0.000424371	0.00161005	0.00169069	0.000118576	0.00024064
Candidatus_Contubernalis	0	0	1.10027e-05	0	0	0
Candidatus_Dependentiae_bacterium__ex_Spumella_elongata_CCAP_955_1	0	1.03556e-05	2.08756e-05	8.31788e-06	0	0
Candidatus_Dichloromethanomonas	0	0	2.88154e-05	1.66358e-05	0	0
Candidatus_Endonucleariobacter	0	1.03556e-05	0	0	0	0
Candidatus_Entotheonella	0.00046788	0.00086057	7.08327e-05	2.09186e-05	0	7.55518e-05
Candidatus_Finniella	0	0	0	0	0	2.11902e-05
Candidatus_Fonsibacter_ubiquis	0	0	0	0	4.18504e-05	0
Candidatus_Hamiltonella	0	0.000212057	0.000976282	0.000895176	9.60888e-05	1.21752e-05
Candidatus_Hepatoplasma	0	0	0	8.96047e-06	1.35513e-05	0
Candidatus_Isobeggiatoa	0	0	0	0	0	1.8163e-05
Candidatus_Koribacter	1.87158e-05	0	3.15246e-05	1.19535e-05	0.00485952	3.60412e-05
Candidatus_Lariskella	0	0	0	1.49341e-05	0	0
Candidatus_Latescibacter	0	0	0	0	0	1.76111e-05
Candidatus_Liberibacter	0	9.3686e-06	4.18104e-05	0	0	0
Candidatus_Megaira	0	0	0	3.32715e-05	0	3.0438e-05
Candidatus_Metachlamydia	9.96698e-06	0	0	0	0	0
Candidatus_Methylopumilus	0	0	8.8022e-06	0	8.54446e-05	2.34814e-05
Candidatus_Microthrix	0	0	0	0	0	0.00014056
Candidatus_Nitrotoga	0	0	0	1.79303e-05	0	2.99038e-05
Candidatus_Nucleicultrix	0	0	6.34892e-05	3.2869e-05	0.000111601	2.99958e-05
Candidatus_Obscuribacter	0	0	0	0	0	2.64166e-05
Candidatus_Omnitrophus	0	6.16221e-06	5.93278e-05	2.02652e-05	0.000148001	2.13066e-05
Candidatus_Ovatusbacter	5.19391e-05	0.000190243	5.54924e-05	7.23144e-05	0.000130651	7.24261e-05
Candidatus_Paracaedibacter	0	0.00014609	9.35244e-05	2.62481e-05	0.000449595	0.000156307
Candidatus_Planktoluna	0	0	0	0	0.00013427	0
Candidatus_Planktophila	0	0	0	3.04989e-05	0	0
Candidatus_Portiera	0	0.00074001	0.00251679	0.00244383	0.002092	8.21327e-05
Candidatus_Profftella	0	0	0	0	5.08173e-06	0
Candidatus_Protochlamydia	0	0	0	0	2.44127e-05	0
Candidatus_Puniceispirillum	0	0	0	0	0	0.000120342
Candidatus_Riegeria	0	6.16221e-06	2.86656e-05	4.88606e-05	0	1.82628e-05
Candidatus_Saccharimonas	0.00107365	0.000915285	0.00172804	0.00169209	0.00214708	0.00973785
Candidatus_Schmidhempelia	0	0	0	8.96513e-06	0	0
Candidatus_Soleaferrea	0.000140978	0.000109906	0.000453125	0.000376138	0.00130048	0.000721128
Candidatus_Solibacter	0.000478947	0.00574792	0.00549967	0.00504217	0.0333419	0.0039007
Candidatus_Stoquefichus	0	2.37471e-05	1.83769e-05	2.09124e-05	0.000147672	0.000723811
Candidatus_Tenderia	0	0	6.45329e-05	3.58512e-05	2.71026e-05	0.000334732
Candidatus_Thiobios	0	0	1.54038e-05	2.09186e-05	0	1.21087e-05
Candidatus_Trichorickettsia	0	0	6.60165e-06	0	0	0
Candidatus_Udaeobacter	0.000128003	0.000227552	0.000161542	8.10715e-05	0.00540006	1.8163e-05
Candidatus_Xiphinematobacter	0	0	2.20055e-05	0	0.00252201	9.13139e-06
Candidimonas	0	0	8.83143e-06	6.78401e-05	3.55885e-05	0
Capnocytophaga	0	0.000507608	0.00175391	0.0017342	0.00131662	0.000677161
Caproiciproducens	0	2.81058e-05	0.000247037	0.00011757	0.000214983	1.21087e-05
Carboxylicivirga	0	0	0	0	0	3.55901e-05
Cardiobacterium	0	5.80616e-05	0.000172541	0.000173432	0	5.73899e-05
Carnobacterium	0	0.00027792	0.000451994	0.000540218	0	0.000108651
Castellaniella	0	7.14429e-05	0.00016362	0.000123524	0.000340938	7.87897e-05
Catabacter	0	0	0	0	0	1.51359e-05
Catellicoccus	0	0	0	1.10905e-05	0	0.00220512
Catenibacillus	0	0	0	1.49341e-05	0	6.80611e-05
Catenibacterium	0	1.87372e-05	0.000245131	0.000199076	0.00299957	0.000343996
Catenisphaera	0	8.21629e-06	4.6661e-05	4.56565e-05	0	0.000245306
Catenulispora	0	0	0	0	0.000260534	8.68581e-05
Catonella	0	0.000228206	0.000890217	0.000741829	0	1.46759e-05
Caulobacter	0.0125998	0.00115304	0.000481015	0.000734005	0.00205274	0.00220145
Cavicella	0	0	1.71593e-05	0	0.000143364	3.34818e-05
Celeribacter	0	0	0	0	0	5.34772e-05
Cellulomonas	0.000860188	0	1.02609e-05	1.66358e-05	0.000202277	9.48035e-05
Cellulosilyticum	5.24042e-05	1.55334e-05	4.49055e-05	4.54408e-05	2.03269e-05	0.000461689
Cellulosimicrobium	0.0013207	0	0	0	0	4.85013e-05
Cellvibrio	0.0418144	0.0362306	0.000807475	0.000692144	0.000613568	0.00141234
Cephaloticoccus	0	0	0	0	0	2.72446e-05
Cerasibacillus	0	0	5.7041e-05	1.19473e-05	0	0.00050793
Cerasicoccus	0	3.49192e-05	0	1.94084e-05	0	9.13139e-06
Cereibacter	0	1.43785e-05	1.84697e-05	0	0	0.000146492
Cesiribacter	2.13251e-05	3.26687e-05	0	0	0	0
Cetobacterium	3.32233e-05	0.00158015	0.00487662	0.00447385	0.00545546	0.0198188
Chelativorans	0	0.000539858	0.000112772	0.000106874	0	7.78786e-05
Chelatococcus	0	6.98384e-05	1.76629e-05	0	0	9.09905e-05
Chelatococcus_asaccharovorans	0	0	8.20875e-06	0	0	2.72446e-05
Chiayiivirga	0	0	8.8022e-06	0	0	1.82628e-05
Chishuiella	0	1.29006e-05	4.08304e-05	4.65086e-05	4.18504e-05	2.11902e-05
Chitinibacter	0	0	2.99467e-05	2.98838e-05	0	1.82628e-05
Chitinilyticum	0	0	2.13207e-05	0	0	0
Chitinimonas	0	0	8.20875e-06	0	0	3.63926e-05
Chitinophaga	0.000381066	0.00445656	0.000342706	0.000440444	0.000541479	6.82694e-05
Chlorobium	0	0	1.10027e-05	0	0	0
Christensenella	0	0	1.23131e-05	0	0	3.3382e-05
Christensenella_sp._Marseille_P2437	0	1.03556e-05	5.69775e-05	5.26799e-05	0	7.19162e-05
Christensenellaceae_R_7_group	0.000433316	0.0113674	0.0425124	0.0426278	0.00635723	0.0507419
Chryseobacterium	0.000843197	0.000977484	0.000616023	0.000520177	0.000631234	0.000694244
Chryseolinea	0.00033854	0.000565685	0.00085866	0.000750879	0.00159594	0.000432087
Chryseomicrobium	0	4.9804e-05	0.000264347	0.000306794	0	2.43504e-05
Chthoniobacter	0.000647183	0	1.71593e-05	2.77263e-06	0.000403204	0
Chthonobacter	0	3.51323e-05	0	0	0.000755265	0.000127623
Chthonomonas	0	0	0	0	0.000116776	0
Chujaibacter	0	0.000386885	0.00039703	0.000336679	0.00165562	0.00027791
Citrifermentans	0	0.00020762	0.000824326	0.000783435	0.000582153	0.000216131
Citrobacter	0	1.84866e-05	0.000188243	0.000177074	0	0.000955019
Clade_Ia	0	0	0	0	0	6.95064e-05
Clade_Ib	9.96698e-06	0	0	0	0	0
Cloacibacillus	0	2.46113e-05	4.01785e-05	2.39023e-05	0	8.80553e-06
Cloacibacterium	0	2.67029e-05	3.19697e-05	1.19535e-05	0.00109159	0.000448886
Clostridiales_bacterium_42_27	0	2.95837e-05	7.87805e-05	3.8838e-05	0	0.00058423
Clostridiales_bacterium_DTU053	0	0	0	2.68876e-05	0	0
Clostridioides	0	0.000154055	6.8217e-05	0	0.000636122	0.000581067
Clostridium_sensu_stricto_1	9.67348e-05	0.00591419	0.0134975	0.0149731	0.0151664	0.0250883
Clostridium_sensu_stricto_10	0	7.94201e-05	0.000430068	0.00040647	0.000817827	0.000258008
Clostridium_sensu_stricto_11	0	0.000109743	0.000250311	0.000131428	0	2.42174e-05
Clostridium_sensu_stricto_12	0	5.61626e-05	0.000421581	0.000306159	0.00456213	0.000327735
Clostridium_sensu_stricto_13	0	3.60715e-05	5.03466e-05	4.39626e-05	0.000261565	0.000590075
Clostridium_sensu_stricto_15	0	0	3.21181e-05	1.19535e-05	0	0
Clostridium_sensu_stricto_18	0	0	1.76629e-05	0	0	0
Clostridium_sensu_stricto_19	0	1.03556e-05	0	0	0	0
Clostridium_sensu_stricto_2	0	0	8.8022e-06	0	0	0
Clostridium_sensu_stricto_3	0	3.0324e-05	6.7473e-05	3.28721e-05	0.000132125	0.000167913
Clostridium_sensu_stricto_5	0	0	1.83769e-05	2.09186e-05	0	0
Clostridium_sensu_stricto_6	0	1.9639e-05	6.84889e-05	3.58496e-05	0	5.42963e-05
Clostridium_sensu_stricto_7	0	0	1.32033e-05	1.19473e-05	0	6.62542e-05
Clostridium_sensu_stricto_8	1.9934e-05	0.000167642	0.000119274	0.000107531	0	0.00028915
Clostridium_sensu_stricto_9	0	2.84779e-05	0.000104297	2.68954e-05	0	0
Cm1_21	0	0	8.8022e-06	0	0	3.90263e-05
Cnuella	0	3.30356e-05	1.02609e-05	2.09078e-05	1.8633e-05	5.0767e-05
Cobetia	0	0	0	0	0	8.48606e-05
Cocleimonas	0	7.02645e-06	2.73011e-05	0	0	2.34814e-05
Cohaesibacter	0	0	0	0	5.58006e-05	0
Cohnella	0	0.0004279	2.99175e-05	8.31788e-06	4.61631e-05	1.51359e-05
Colidextribacter	4.49179e-05	0.00111863	0.00288496	0.00276427	0.00850769	0.00450817
Collimonas	0	0	0	0	0.00022851	0
Collinsella	3.19876e-05	1.75849e-05	0.000150298	7.50963e-05	0.0108876	0.000574188
Colwellia	0	0	1.54038e-05	0	0	0.000414698
Comamonas	0.00011018	0.000509369	0.00129955	0.00115533	0.00361574	0.00116592
Commensalibacter	0	0	8.44854e-05	0.000173463	0	0
Companilactobacillus	4.57152e-05	0.000139657	0.000684333	0.000602469	0.000802722	5.16116e-05
Conchiformibius	0	0	0	0	0	1.21087e-05
Conexibacter	0.000796829	0.000347692	0.0004418	0.000551064	0.0022936	0.00036268
Confluentibacter	0	0	1.02609e-05	2.38946e-05	0	3.95694e-05
Constrictibacter	0	5.32921e-05	0.000225293	0.000154684	0	3.65256e-05
Coprobacillus	0	0	8.8022e-06	8.96513e-06	0	6.37203e-05
Coprobacter	0	0	0	0	0	8.05953e-05
Coprococcus	0	0.000521059	0.00127519	0.00113228	0.00328964	0.00937695
Coprothermobacter	0	7.02645e-06	6.60165e-06	1.19535e-05	0	0
Corallibacter	0	0	0	0	0	8.80553e-06
Corallococcus	0	0	2.58131e-05	0	0	0
Coriobacteriaceae_UCG_002	0	0.000150256	0.000166715	6.93156e-05	0.000408078	0.000286574
Corticicoccus	0	8.21629e-06	0	0	0	0
Corynebacterium	3.55418e-05	0.000340748	0.00212696	0.00159241	0.000534927	0.00161215
Cosenzaea	0	5.0375e-05	0.00027686	0.000468926	3.73679e-05	0
Coxiella	0.000200997	0.000296246	0.000660786	0.000661018	0.000253179	0.000285402
Craurococcus_Caldovatus	3.74316e-05	5.70708e-05	7.79086e-05	6.37885e-05	0	0.000288406
Crenobacter	0	3.08174e-05	0.000139178	0.000106246	0	0.000122223
Crenothrix	0	1.03556e-05	7.89859e-05	5.35429e-05	0.000170825	0
Croceibacter	0	1.87372e-05	1.32033e-05	0	0.000136014	0
Croceicoccus	0	0	0	0	0	9.20945e-05
Croceitalea	0	0	0	0	0	0.000677585
Crocinitomix	0.000421304	6.16221e-06	4.41571e-05	5.88967e-05	0.00040037	4.43036e-05
Cronobacter	0	0	0	0	0.000491189	3.81573e-05
Crossiella	0	2.74909e-05	7.26517e-05	5.24854e-05	3.15661e-05	6.35707e-05
Cryomorpha	0	0.000115028	0	0	0	3.63261e-05
Cryptanaerobacter	0	0.000144719	0.000543854	0.000689787	1.52452e-05	0
Cryptosporangium	0	0	0	0	0	3.63261e-05
Cucumibacter	0	0	0	0	0	1.51359e-05
Cuneatibacter	0	0	0	0	0	8.96769e-05
Cupriavidus	6.69117e-05	0.000737217	0.000810134	0.000771937	0.00120067	0.000914285
Curtobacterium	0	0	0	0	0.000419944	0.00126551
Curvibacter	0	0	4.28241e-05	0.000100278	0.000270961	0.00020807
Cutibacterium	0	4.10814e-05	0	0	0.0124118	0.00424011
Cyanobium_PCC_6307	0	0	8.83143e-06	0	3.49044e-05	2.09807e-05
Cycloclasticus	0	0	6.15656e-06	0	0	9.13139e-06
Cytophaga	6.8765e-05	5.64571e-05	0.000116928	6.78603e-05	0.000693981	0
DEV008	0	0	0	0	0.00011688	0
DEV114	0	5.17779e-06	6.66143e-05	2.90208e-05	0	0
DMER64	0	0.00602637	0.0240025	0.023147	1.35513e-05	6.68139e-05
DNF00809	0	7.76669e-06	0	0	0.000169145	6.67474e-05
DSSD61	0	6.16221e-06	2.33159e-05	1.49341e-05	0	4.253e-05
DSSF69	0	0.000272207	0	0	0	7.28683e-05
DTU089	0	0	4.10993e-05	0	0.00133211	0
Dactylosporangium	0.000145721	0.000330814	4.69577e-05	0	2.84708e-05	0.000151675
Dechlorobacter	0	0	7.2355e-05	1.19535e-05	0	9.68608e-05
Dechloromonas	0	8.17985e-05	0.00024939	0.000200986	1.04626e-05	0.00037666
Dechlorosoma	0	0	0	0	0	9.57235e-05
Deefgea	0	0	0	8.31788e-06	0	3.27214e-05
Deferrisoma	0	0	5.35301e-05	1.49419e-05	0	7.19406e-05
Defluviicoccus	3.55418e-05	0.000168754	0.00025593	0.000212321	0.000190071	0.000694061
Defluviimonas	0	0	0	8.96047e-06	0	7.04442e-05
Defluviitalea	0	7.02645e-06	7.09532e-05	4.67275e-05	0	7.81202e-05
Defluviitaleaceae_UCG_011	0	0.000140359	0.00048719	0.000495639	2.49119e-05	0.00135484
Defluviitoga	0	2.11608e-05	0.000180662	0.000117761	0	3.02717e-06
Dehalobacter	0	0	6.15656e-06	8.31788e-06	0	0
Dehalobacterium	0	0	1.76336e-05	0	0	0
Deinococcus	0.000291399	8.21629e-06	4.01785e-05	1.13063e-05	0.000254087	1.21752e-05
Delftia	8.88545e-05	0.000207089	0.000627202	0.000676549	0.000611085	0.00733999
Demequina	0	1.64326e-05	3.91955e-05	1.49341e-05	0	0.000135017
Denitratisoma	1.77709e-05	8.21629e-06	0	0	0.000495897	0.000116311
Denitromonas	0	0	0	0	0	9.08152e-06
Derxia	0	8.21629e-06	0	0	0	7.18652e-05
Desemzia	5.24042e-05	3.08111e-05	2.05219e-05	8.31788e-06	0	0
Desertibacter	0.000127255	3.24219e-05	0	0	0	3.26549e-05
Desulfallas_Sporotomaculum	0	4.10814e-06	6.61042e-05	3.77701e-05	0	0
Desulfatiglans	0	9.3686e-06	2.93533e-05	0	2.87965e-05	0.000201379
Desulfatirhabdium	0	0	0	0	0	3.64425e-05
Desulfatitalea	0	0	0	0	0	4.23804e-05
Desulfitibacter	0	5.34059e-05	0.000247002	0.000132694	0	3.57741e-05
Desulfitispora	0	0	0	0	0	2.73942e-05
Desulfitobacterium	0	0	2.498e-05	6.01591e-05	6.97507e-05	1.5219e-05
Desulfobacca	0	5.045e-05	0.000217177	0.000232155	1.89322e-05	0.000316234
Desulfobacter	0	0	1.17752e-05	0	0	1.21752e-05
Desulfobacterium	0	0	8.8022e-06	2.39023e-05	0	0
Desulfobulbus	0	0.00011439	0.00061793	0.000590561	0	0.000599563
Desulfocapsa	0	0	3.40803e-05	0	0	0
Desulfococcus	0	0	3.24148e-05	0	0	1.76111e-05
Desulfofaba	0	0	0	0	0	4.10925e-05
Desulfofrigus	0	0	0	0	0	2.05462e-05
Desulfohalotomaculum	0	8.21629e-06	0	0	0	3.5548e-05
Desulfomicrobium	0	0.000170271	0.000459809	0.000682271	0	0.000117665
Desulfomonile	0	6.16221e-06	0	0	2.66913e-05	2.69686e-05
Desulfonatronum	0	0	0	0	0	5.47883e-05
Desulfopila	0	0	0	0	0	4.69628e-05
Desulforhabdus	0	0	1.23131e-05	8.31788e-06	0	1.21087e-05
Desulforhopalus	0	0	0	0	0	2.11902e-05
Desulfosalsimonas	0	0	0	0	0	1.17407e-05
Desulfosarcina	0	0	8.8022e-06	0	0	2.72446e-05
Desulfosoma	0	0	0	0	0	3.65256e-05
Desulfosporosinus	0	1.02704e-05	0.000122229	8.38457e-05	0	1.21752e-05
Desulfotalea	0	0	0	0	0.000373679	0
Desulfotignum	0	0	0	0	0	1.8163e-05
Desulfotomaculum	0	0	0	0	1.69391e-06	1.17407e-05
Desulfovibrio	0.00021114	0.00365832	0.0115278	0.0117033	0.00202789	0.0165409
Desulfovirga	0	0	0	0	0	2.08721e-05
Desulfuribacillus	0	0	6.60165e-06	0	0	0
Desulfurispirillum	0	0	1.02609e-05	0	0	0
Desulfurispora	0	6.16221e-06	1.23131e-05	0	0	1.21752e-05
Desulfurivibrio	0	0	0	0	0	7.53601e-05
Desulfuromonas	0	3.12257e-05	0.000200731	0.000211242	2.54087e-05	4.26132e-05
Desulfuromusa	0	0	8.83143e-06	1.49419e-05	0	3.03382e-05
Dethiobacter	0	3.28651e-05	0	0	0	0
Dethiosulfovibrio	0	0	6.60165e-06	0	0	0
Devosia	0.0161541	0.0111865	0.00285956	0.00275659	0.00345085	0.00397717
Dialister	4.44527e-05	0.00164428	0.00616273	0.00620393	0.00954563	0.00075828
Diaphorobacter	0	0	2.46262e-05	7.20883e-05	0	0.000115033
Dielma	0	4.10814e-06	0	1.49341e-05	0	6.29178e-05
Dietzia	0	0	6.02209e-05	3.9464e-05	0.000104812	0.000595693
Dinghuibacter	0	7.75352e-05	0.000264999	0.000302118	0.000448218	7.40234e-05
Dinoroseobacter	0	0	0	0	0	6.3135e-05
Diplosphaera	4.49179e-05	0	0	0	0	0
Dokdonella	0.000355183	0.00107191	0.000437389	0.000514007	0.0032772	0.000423421
Dolosicoccus	0	0	0	0	0.000188327	0
Dolosigranulum	0	8.83251e-05	6.15656e-06	8.31788e-06	9.59072e-05	0.000574537
Domibacillus	0.000203592	2.07112e-05	5.9835e-05	0	0	1.21087e-05
Donghicola	0	0	0	0	0	3.81573e-05
Dongia	0.0141824	0.00555854	0.00389255	0.00368986	0.00342861	0.00128726
Dorea	9.96698e-06	0.000481094	0.001067	0.00123258	0.000653359	0.00101892
Draconibacterium	0	0	8.8022e-06	0	0	0
Dubosiella	0.000245238	0.00178359	0.00363937	0.00372653	0.00537277	0.00440963
Duganella	0	3.15164e-05	0	9.7952e-05	0.00098979	0.000116562
Dyadobacter	0.0055971	0.000192759	8.06536e-05	0.000118	0.000994903	0.000383812
Dyella	0	6.23312e-05	0.000169327	0.000290403	0.00279699	0.000194723
Dysgonomonas	1.06625e-05	0.000241737	0.000103815	0.000116078	7.178e-05	0.000121077
E1B_B3_114	0	0	0	1.49341e-05	0	0
EBM_39	0	2.76524e-05	8.09189e-05	7.04187e-05	0	0
EMP_G18	0	1.23244e-05	6.60165e-06	8.31788e-06	0	9.13139e-06
Echinicola	0	0	8.8022e-06	0	0	1.82129e-05
Ectothiorhodospira	0	0	0	8.31788e-06	0	1.46759e-05
Edaphobacter	0	0	0	8.96047e-06	0.00190864	2.43504e-05
Edaphobaculum	0.0032602	0.00152716	0.000637047	0.000586927	0.00103123	0.000144733
Edwardsiella	0	0	8.74014e-05	6.01638e-05	0	0
Eggerthella	0	0	1.43653e-05	0	0	0
Eggerthia	0	0	0	0	0	8.80553e-06
Egibacter	0	0	0	0	0	1.82628e-05
Egicoccus	0	3.90274e-05	1.0706e-05	3.39141e-05	0	0
Eikenella	0	2.10794e-05	3.41703e-05	8.96513e-06	0	0
Eionea	0	0	1.43653e-05	4.4807e-05	0	9.86741e-05
Eisenbergiella	0	8.18373e-05	7.24756e-05	8.51278e-05	0	0.000489009
Ekhidna	0	0	0	0	0	9.08152e-06
Elioraea	0	0	1.54038e-05	0	0	0
Elizabethkingia	0	0.00036627	0.000630085	0.000541314	0.000180699	9.11477e-06
Ellin516	0	0	0	0	0.00117366	0
Ellin517	3.81685e-05	0	1.02609e-05	1.19473e-05	0.000839442	0
Ellin6055	0.00252372	0.0136927	0.000454369	0.000125512	0.000178162	0.000367319
Ellin6067	0.00140055	0.0101426	0.00623543	0.00724637	0.00671496	0.00286012
Elstera	0	0	0	0	0.000456867	0.000295204
Elusimicrobium	0	0	0	0	0	3.03715e-05
Empedobacter	0	5.69105e-05	0.000328099	0.000397486	0	2.69686e-05
Emticicia	0	1.43785e-05	7.51241e-05	3.75497e-05	2.03269e-05	3.54981e-05
Endomicrobium	9.05538e-05	0	2.73011e-05	0	1.06765e-05	0
Endozoicomonas	0	4.4953e-05	0.000177097	0.000226796	0	0
Enhydrobacter	7.10836e-06	0.000288181	0.000700719	0.000836554	0.00418042	0.00532778
Ensifer	0.00981675	0.0132925	0.00064419	0.0004101	0.000548584	0.000556472
Enteractinococcus	0	7.02645e-06	0	0	0	9.08152e-06
Enterobacter	0.00164795	0.00260002	0.00672298	0.00661478	0.0102461	0.00635954
Enterococcus	0.00144911	0.00635319	0.0149747	0.0154262	0.00712953	0.00515492
Enterorhabdus	2.84334e-05	3.87018e-05	9.62365e-05	9.34368e-05	0.000376905	0.00144
Enterovibrio	0	2.22692e-05	4.67472e-05	0	0	9.13139e-06
Epulopiscium	0	2.05407e-05	8.65997e-05	4.48148e-05	4.77879e-05	0.000188184
Ercella	0	0.000290791	0.00140582	0.00119737	0	2.93518e-05
Erysipelatoclostridium	5.5012e-05	0.000866832	0.00152617	0.00170967	0.00136038	0.00442522
Erysipelothrix	0	0.000148202	0.000353856	0.000343926	0	0.000116528
Erysipelotrichaceae_UCG_002	0	0	0	0	0.00013427	0
Erysipelotrichaceae_UCG_003	0	5.59986e-05	4.67801e-05	8.49229e-05	0.000541443	0.000406581
Erysipelotrichaceae_UCG_006	0	5.27986e-05	0.000140212	0.000251317	0	0
Erysipelotrichaceae_UCG_008	0	0	0	8.96513e-06	0	4.19614e-05
Erysipelotrichaceae_UCG_009	4.32171e-05	0	3.16094e-05	4.09696e-05	0.000424782	0.000583115
Erythrobacter	4.49179e-05	5.71509e-05	6.10219e-05	7.97755e-05	0.000106765	0.000352762
Escherichia_Shigella	0.00102785	0.0080357	0.0157215	0.0161477	0.277454	0.0674259
Ethanoligenens	0	0	6.15656e-06	8.31788e-06	0	2.64166e-05
Eubacterium	0	5.05391e-05	0.000192763	0.000289752	0	5.90715e-05
Eubacterium_coprostanoligenes	0	0	0	0	0	0.000141747
Eudoraea	0	0	0	0	0	0.000114069
Euryhalocaulis	0	4.10814e-06	2.93241e-05	1.49341e-05	0	0
Euzebya	0	4.95534e-05	0	0	0	0
Exiguobacterium	0.000945158	5.13143e-05	0.000823543	0.000273938	0.000225885	0.00122725
Ezakiella	0	3.21313e-05	2.88154e-05	0.000107549	0	8.6826e-05
F0058	0	2.10794e-05	0.00014756	0.000139976	0	2.43504e-05
F0332	0	0	4.43968e-05	0	0.000369826	0
F1_37X2	0	6.16221e-06	0	0	0	1.21752e-05
FCPS473	0	0	6.60165e-06	0	0.000373455	0
FD2005	0	1.03556e-05	2.20055e-05	0	0	8.80553e-06
FFCH5858	0	6.16221e-06	2.46262e-05	0	0	0
FFCH7168	0.000113597	9.3686e-06	0	0	0	1.76111e-05
Facklamia	0	0.000715036	0.00231985	0.00228667	0	0.00024816
Faecalibacterium	0.000135462	0.00182035	0.0052586	0.00574761	0.0271718	0.00713443
Faecalibaculum	0.000117288	0.000277788	0.000704834	0.000702107	0.00307697	0.00390302
Faecalicoccus	0	3.57898e-05	5.09137e-05	5.67558e-05	0.000306061	1.76111e-05
Faecalitalea	0	7.02645e-06	7.85656e-05	6.57121e-05	0	0.000115023
Faecalitalea_sp._Marseille_P3755	0	6.16221e-06	1.84697e-05	0	0.000388419	9.13139e-06
Family_XIII_AD3011_group	4.49179e-05	0.000228442	0.000352781	0.000354205	0.000361067	0.00257855
Family_XIII_UCG_001	0	3.25834e-05	0.000155591	0.000133773	1.69391e-05	0.000529456
Fastidiosipila	0	0.00536576	0.0206448	0.0187326	0.000394681	0.00122115
Fenollaria	0	1.39289e-05	4.43968e-05	5.86701e-05	0.0001357	0.000243493
Fermentimonas	0	0.00548557	0.0151694	0.016619	0.000136014	0.000193793
Ferribacterium	0	0	0	0	0	1.21752e-05
Ferrimonas	0	0	0	0	0	0.000103166
Ferritrophicum	0	0	8.20875e-06	8.96047e-06	0	6.56102e-05
Ferrovibrio	0.00256066	0.00236277	4.11256e-05	4.78e-05	0.000298128	0.000316511
Ferruginibacter	0.00027209	0.000972568	0.00127106	0.00133803	0.00148882	0.000125041
Fervidicella	0	0	0	0	0	2.43504e-05
Fibrella	0	7.76669e-06	0	0	0	0
Fibrobacter	3.32233e-05	0.000217172	0.000432968	0.000407987	0.000226725	0.000788635
Fictibacillus	0	0.00038321	1.84697e-05	2.49536e-05	0	8.38985e-05
Filifactor	0	0.000379418	0.00101705	0.00132493	2.49119e-05	2.98616e-05
Filimonas	0	0	1.79318e-05	2.38992e-05	0	0
Filobacterium	0	0	0	0	0	2.40245e-05
Filomicrobium	0	0.000591569	0.00178032	0.0020507	0	5.35692e-05
Fimbriimonas	0	1.40529e-05	0	0	0	0
Finegoldia	0	0.000300358	0.00113807	0.000958643	0.00071762	0.00118135
Firmicutes_bacterium_1229_1IIA	0	0	0	1.49419e-05	0	0
Flaviaesturariibacter	0.000251595	0.00363248	0.000287122	0.000164515	0.000177861	3.34319e-05
Flavihumibacter	0	3.28651e-05	0.000182142	0.000216362	0.00031229	0.000101677
Flavisolibacter	0.000201283	0.0075	0.00425266	0.00425767	0.00230025	0.000740427
Flavisolibacter_sp.	0	5.68304e-05	0.000266276	0.000194756	0	4.77819e-05
Flavitalea	0.000254861	0.00571524	0.000726041	0.00109259	0.000584474	8.42078e-05
Flavobacterium	0.0166262	0.00732351	0.00456941	0.0043082	0.00437877	0.00299225
Flavonifractor	2.84334e-05	0.000125017	0.000104143	7.63815e-05	0.000533752	0.000360531
Flectobacillus	0	0	6.60165e-06	1.19473e-05	0.00115123	0
Flexibacter	0	0	0	8.96047e-06	0	0
Flexilinea	0	0	0	0	8.71884e-06	0
Fluviicoccus	0	0	0	0	0	1.17407e-05
Fluviicola	0.00515875	0.00263561	0.000460759	0.000539151	0.000564463	0.000322232
Fonticella	0	6.49176e-05	0.000172663	0.000255185	0	0.000151263
Fontimonas	0	4.6843e-05	1.54038e-05	1.79209e-05	0	0.000149366
Formivibrio	0	0	9.18844e-05	0.000101574	0	3.01121e-05
Formosa	0	0	1.24893e-05	0	0	6.32935e-05
Fournierella	0	4.51896e-05	9.26291e-05	0.000107743	0.0013233	0.000267124
Francisella	0	0	0	0	0.0001948	1.21087e-05
Frankia	0	0	0	0	2.84708e-05	0
Frateuria	0	0	1.76044e-05	8.96513e-06	0	0
Fretibacterium	0	2.8757e-05	0	0	0	0.000234293
Friedmanniella	0	0	0	0	0.000244095	8.64081e-05
Frischella	0	5.63719e-05	0.000144767	0.00016748	5.2313e-05	2.10893e-05
Frisingicoccus	0	0.00194159	0.00525626	0.00492262	0	0.000648065
Fructilactobacillus	0	9.3686e-06	2.11445e-05	2.8583e-05	0.000204963	2.73277e-05
Fructobacillus	0	0	2.38194e-05	0	0	0
Fulvivirga	0	0	6.60165e-06	0	0	5.16614e-05
Furfurilactobacillus	0	6.58632e-05	0.000217567	0.000171096	0	0
Fusibacter	0	2.34215e-05	8.97197e-05	0.000114773	0	0.000100179
Fusicatenibacter	0	0.000118206	0.000163175	0.000215487	0.000379017	0.000448226
Fusobacterium	0	0.00599191	0.030956	0.0274825	0.0170993	0.0027449
G12_WMSP1	0	0	0	0	1.2456e-05	0
GCA_900066575	0	0.00127134	0.00311237	0.00291036	0.000780476	0.00251586
GCA_900066755	0	0	0	0	0	1.5219e-05
GKS98_freshwater_group	0	3.80881e-05	5.81687e-05	4.03208e-05	0.000734915	4.8049e-05
GOUTA6	0	8.19766e-05	0.000331189	0.000172632	0.000238569	3.93533e-05
GWE2_42_42	0	0	1.32033e-05	0	0	1.5219e-05
Gaiella	0.00578996	0.000941597	0.00118401	0.00107701	0.00100418	0.0010036
Gaiella_sp._EBR4_RS1	0.000848649	6.10174e-05	1.10027e-05	0	2.20208e-05	5.16947e-05
Galbibacter	0	0.00102087	2.53681e-05	4.41706e-05	0	4.82087e-05
Gallibacterium	0	4.57282e-05	0.000115855	0.000128463	0	0.000113193
Gallicola	0	0.00026753	0.00120963	0.00101123	0	3.34319e-05
Gallionella	0	9.3686e-06	2.64943e-05	0	0	0.000107187
Gardnerella	0	0.00120501	0.00422253	0.00453421	0.00383028	0.0041866
Gelidibacter	0	0.000130255	0.000248758	0.000223378	0	2.34814e-05
Gemella	0	0.000688152	0.00262408	0.00227262	0.00143968	0.000473453
Geminicoccus	0	1.23244e-05	6.29857e-05	7.80832e-05	0	5.41123e-05
Gemmata	0	0	0	0	0.000359209	0
Gemmatimonas	0.00576304	0.0185922	0.0059404	0.0067895	0.00895249	0.00429425
Gemmatirosa	0	0.000111022	1.02609e-05	4.99073e-05	0	7.82698e-05
Gemmobacter	0	0	3.23819e-05	2.77263e-05	0.00122016	0.00264437
Geoalkalibacter	0	0	1.17752e-05	1.19473e-05	0	8.79211e-05
Geobacillus	0	6.16221e-06	0	0	2.20208e-05	0
Geobacter	0	4.92602e-05	0.000299614	0.000237441	7.11769e-06	5.32932e-05
Geodermatophilus	0.000363663	0.000121794	6.15656e-06	0	0	0.000236769
Geomicrobium	0	2.90928e-05	8.80584e-05	6.80667e-05	0	0
Georgenia	0.000138613	0.000381454	0.000289999	0.000324302	0	9.64085e-05
Georgfuchsia	0.00733126	6.42149e-05	2.90844e-05	8.96513e-06	0	1.76111e-05
Geotalea	0	0	0	2.68814e-05	0	0
Geothermobacter	0	0	6.60165e-06	0	0.000160921	0.00013113
Geothermomicrobium	0	8.21629e-06	0	0	0	0
Geothrix	0	4.90637e-05	0.000173994	0.000231945	0	0.000208321
Gilliamella	0	0.000227711	0.000585835	0.000708348	7.14945e-05	0.000344976
Gillisia	0	0	1.43653e-05	1.66358e-05	0	1.17407e-05
Gilvibacter	0	0	1.4719e-05	8.96047e-06	0	0
Glaciecola	0	1.55334e-05	2.86071e-05	2.49536e-05	0.000115089	0.000588091
Globicatella	0	0.000479241	0.000958283	0.000861327	0	0.000660265
Gluconacetobacter	0	2.33001e-05	7.69073e-05	2.98682e-05	0	0
Gluconobacter	0	0.00199698	0.00965149	0.00973111	0.00115495	0.00158458
Glycomyces	4.31902e-05	1.23244e-05	6.86971e-05	6.05937e-05	0.000282073	9.59318e-05
Gordonia	0.000134671	0	0	0	0	0.000331728
Gordonibacter	0	0	0	0	1.04626e-05	0
Gracilibacillus	0	0.000123709	0.000189104	0.000191583	0.000412826	8.18501e-05
Gracilimonas	0	2.25948e-05	1.79318e-05	0	0	0
Gram_negative_bacterium_cTPY_13	0	0	0	0	0.000222428	2.73942e-05
Granulicatella	0	0.00440223	0.0115859	0.0126213	0.000497044	1.82628e-05
Granulicatella_sp._BB_11	0	0	8.20875e-06	8.96513e-06	0	0
Granulicella	4.62043e-05	1.02704e-05	7.53266e-05	2.28283e-05	0.00777594	1.17407e-05
Granulosicoccus	0	0	8.83143e-06	8.96513e-06	8.37008e-05	2.39159e-05
Grylloblatta_bifratrilecta	0	0	1.76336e-05	1.38631e-05	0	0
Gryllotalpicola	0	0	0	0	0	1.21087e-05
Guyparkeria	0	0	0	0	0	2.96776e-05
H1	0	0.000760595	0.00218396	0.00250747	0	9.08152e-06
HAVOmat113	0	0	0	0	1.74377e-05	0
HIMB11	0	5.51808e-05	0.00106195	5.07977e-05	0.00168095	0
HN_HF0106	0	0.000232435	0.000812243	0.000658446	0	6.939e-05
HSB_OF53_F07	0	0	0	0	0.000452579	1.21087e-05
Haematococcus_lacustris	1.12295e-05	1.17108e-05	1.02609e-05	8.96047e-06	0.000312134	1.8163e-05
Haemophilus	3.10602e-05	0.01053	0.0424578	0.0436189	0.00343035	0.00263117
Hafnia_Obesumbacterium	4.86611e-05	0	4.10437e-05	5.07868e-05	3.55885e-05	8.34385e-05
Hahella	0	2.33001e-05	6.08736e-05	0.000102628	0	0
Halarcobacter	0	0	1.32033e-05	8.96513e-06	2.75301e-05	0
Haliangium	0.00365353	0.0385921	0.00986576	0.00924101	0.0129885	0.00547869
Haliea	0	0.000376022	6.15656e-06	4.03161e-05	0	0.000107489
Halioglobus	0	0	5.59653e-05	8.49182e-05	0	0.000401086
Halobacillus	0	6.16221e-06	6.60165e-06	0	0	2.72944e-05
Halobacteriovorax	0	1.84866e-05	6.60165e-06	0	0	0
Halocella	0	0	0	0	0	0.000220003
Halocynthiibacter	0	0	0	0	0	7.81546e-05
Halodesulfovibrio	0	0	0	0	0.000340826	5.10518e-05
Haloimpatiens	0	2.5889e-05	3.98817e-05	0	2.31325e-05	0
Halomonas	0	0.00413618	0.0052011	0.00543057	0.000660828	0.00142593
Haloplasma	0	3.69733e-05	0	0	0	5.98485e-05
Halothiobacillus	0	0	0	0	3.04904e-05	0
Hamadaea	0	0	7.3126e-05	0	0.000225695	0
Hanstruepera	0	0	0	1.66358e-05	0	5.57684e-05
Harryflintia	0	8.0327e-05	0.000242426	0.000339032	0	0.000399523
Hassallia	0.000748903	0.000426475	0.00019996	0.000160232	3.55885e-05	0.000188428
Hathewaya	0	7.62989e-05	0.000175393	0.000216989	0	0
Hazenella	0	0	0	0	0	1.8163e-05
Helcococcus	0	1.72968e-05	7.71098e-05	9.75055e-05	0	0.000226208
Helicobacter	2.62021e-05	0.00848446	0.0300461	0.0296398	0.00945374	0.0115438
Heliimonas	0	0	4.44261e-05	5.4617e-05	0.000427155	0
Henriciella	0	0	2.81927e-05	3.2855e-05	0	0
Hephaestia	0	0	0	0	0	4.9898e-05
Herbaspirillum	0	7.02645e-06	8.82887e-05	3.88427e-05	0	0.000339145
Herbinix	0	7.76669e-06	5.88762e-06	9.6656e-05	0	2.73942e-05
Herminiimonas	0	0	1.70402e-05	0	0.000667256	5.39194e-05
Herpetosiphon	7.33499e-05	0.000274385	5.37026e-05	8.96295e-05	0.000158981	8.12049e-05
Hespellia	0	3.39799e-05	3.23819e-05	0	0	0
Hirschia	0.000124241	0.00137639	0.000675883	0.000708136	0.00126239	0.0005061
Hoeflea	0	0	0	0	0	1.8163e-05
Holdemanella	0	7.84796e-05	0.000131088	0.000124378	0.00296885	0.000358471
Holdemania	0	0	2.93796e-05	2.98682e-05	4.6265e-05	0.000154467
Holophaga	0	0	0	1.66358e-05	0	5.10928e-05
Hoppeia	0	0	0	0	0	7.20326e-05
Howardella	0	1.29445e-05	1.76629e-05	1.66358e-05	0	0.000413061
Huakuichenia	0	0	1.02609e-05	0	0	0
Humibacter	0	0	0	0	0.000109857	0
Hungateiclostridium	0	0	0	0	0	2.98118e-05
Hungatella	0	3.69733e-05	6.60165e-06	2.8583e-05	0.000123655	0.000942032
Hydrocarboniphaga	0	7.02645e-06	0.000115238	5.01551e-05	2.49119e-05	0.000233069
Hydrogenophaga	0.00264732	0.00248242	0.00458954	0.00493242	0.00274085	0.00165666
Hymenobacter	0.000113742	0.000192913	0.000152257	8.30117e-05	0.000275313	0.000321294
Hyphobacterium	0	0	0	0	0	1.46759e-05
Hyphococcus	0	0	0	0	0	5.76659e-05
Hyphomicrobium	0.00102504	0.00169607	0.00131079	0.00155741	0.00134453	0.00213772
Hyphomonas	0	2.46489e-05	1.98342e-05	4.07585e-05	2.09252e-05	0.000140922
Hypnocyclicus	0	0	8.20875e-06	0	0	0
IMCC26134	0.00296766	0	0	0	0	0
IMCC26207	0	0.000178704	0	1.19535e-05	0.000469768	8.41413e-05
IS_44	1.12295e-05	0.000681971	0.000588101	0.000637947	0.00190405	0.000602751
I_8	0	7.30124e-05	4.71009e-05	4.92828e-05	0.000165658	2.93518e-05
Iamia	0.00174977	0.00161399	0.000746019	0.000905546	0.000814273	0.00157064
Ideonella	3.36884e-05	4.6843e-05	0.000698164	0.00050008	0.000368341	0.00020209
Idiomarina	0	0.00117572	0.000224691	0.00014486	2.20208e-05	0.000442379
Idiomarina_sp.	0	0	0	1.94084e-05	0	0
Ignatzschineria	0	1.93509e-05	0.000107356	7.31712e-05	0	2.66926e-05
Ignavibacteria_bacterium_RIFCSPLOWO2_12_FULL_56_21	0	0	0	0	0	8.4609e-05
Ignavibacterium	0	0	9.08495e-05	7.06267e-05	0.000199881	9.69195e-05
Ignavigranum	0	0	0	0	0	3.95694e-05
IheB3_7	0	0	8.8022e-06	0	0	4.16356e-05
Ileibacterium	3.55418e-05	0.000133036	0.00023969	0.000164075	0.0010549	0.000755386
Ilumatobacter	0.0959758	0.0102808	0.000835757	0.000901424	0.00139721	0.00150672
Immundisolibacter	0	0	0	0	0.000104626	1.5219e-05
Imperialibacter	0	0	8.83143e-06	8.96047e-06	0	0
Incertae_Sedis	1.73072e-05	0.000690577	0.00247987	0.00241192	0.001664	0.00222498
Inhella	0	7.02645e-06	7.26795e-05	3.79781e-05	0	3.3382e-05
Inquilinus	2.48792e-05	8.39766e-05	0.000155208	6.27559e-05	0.00107145	0.000138646
Intestinibacter	0	0	0	0	0.000588593	0.000231152
Intestinimonas	0	0.00033621	0.000684979	0.000759077	0.00082395	0.00120963
Irregularibacter	0	7.76669e-06	3.81818e-05	8.31788e-06	0	0
Izimaplasma	0	0	1.17752e-05	0	0	0
JCM_18997	0	0	2.4206e-05	2.39008e-05	0	0
JG30a_KF_32	0	0	0	0	8.7331e-05	0
JGI_0000079_D21	0	0	0	0	1.01635e-05	0
JGI_0001001_H03	0	0	0	8.96513e-06	6.93975e-05	1.82628e-05
JTB255_marine_benthic_group	8.288e-05	0.000773054	0.000281115	0.000403056	0	0.000395787
Jahnella	0.00184279	0.000496536	0	0	0	0
Jannaschia	0	0	0	0	0	0.000148507
Janthinobacterium	0	1.64326e-05	6.60165e-06	1.10905e-05	0.000291353	0.000182739
Jatrophihabitans	0	8.14831e-05	0.000452586	0.000347762	0.000761742	0.000184905
JdFR_76	0	0.00077359	0.00361344	0.00351898	0	0
Jejudonia	0	0	0	0	0	1.8163e-05
Jeotgalibaca	0	0.000346955	0.00105645	0.00112395	0	0.000158165
Jeotgalibacillus	0	0	0	0	0	3.34818e-05
Jeotgalicoccus	0	0.000968839	0.00274835	0.00314393	0.000426955	0.00039454
Jiangella	0	0	8.8022e-06	0	0	9.13139e-06
Johnsonella	0	3.81282e-05	9.28133e-05	0.000153822	0.000176121	0.00012086
KCM_B_112	0	4.10814e-06	8.96005e-05	4.35311e-05	0	2.42673e-05
KD3_10	0.000223588	1.5983e-05	1.32033e-05	0	7.12461e-05	2.64166e-05
Kaistia	0.00034993	0.000873306	0.000134265	5.56926e-05	4.35942e-05	0.000232964
Kandleria	0	0	0	0	0	7.19406e-05
Kangiella	0	0	1.76629e-05	1.10905e-05	0	2.43504e-05
Keratinibaculum	0	0	3.13763e-05	0	0	0.000497411
Kerstersia	0	0	1.89148e-05	2.09186e-05	0	0
Ketobacter	6.52727e-05	0.00017577	0.000236811	0.000304477	0	9.25544e-05
Kibdelosporangium	2.99453e-05	3.62445e-05	0	0	0	0
Kineococcus	2.2459e-05	0	0	0	0	0
Kineosporia	0	0	0	0	2.99936e-05	0
Kingella	0	7.76669e-06	9.5133e-05	6.88992e-05	0	5.33852e-05
Kitasatospora	0	0	0	0	0	4.23804e-05
Klebsiella	0	0.00398217	0.0146507	0.0151901	0.00640515	0.00721204
Klenkia	6.73769e-05	0	0	0	0	0.000121087
Kocuria	0.00353655	0.000202407	0.000907284	0.000920181	0.000208811	0.00130441
Komagataeibacter	0	0	6.15656e-06	0	0	0.000129297
Kordiimonas	0	2.67029e-05	8.8022e-06	8.31788e-06	0	1.17407e-05
Kosakonia	7.46377e-05	0.0013374	0.00464639	0.00481521	0.0039652	0.000501408
Koukoulia	0	0	0	2.98838e-05	0	0
Kribbella	0.000196415	4.94682e-05	3.96976e-05	6.465e-05	0.000108545	0.000144726
Kroppenstedtia	0	0	1.43653e-05	0	4.18504e-05	2.42839e-05
Ktedonobacter	0	0	0	0	7.11769e-06	0
Kurthia	0.000255901	1.29445e-05	2.25741e-05	0	0	3.0438e-05
Kutzneria	0	0	0	0	0.000137634	0
LCP_80	0	0	0	0	0	0.000114053
LD29	0	1.64326e-05	0	0	0	0
LNR_A2_18	0	0.000682601	0.00220863	0.00218847	0	0
Labedaea	0	0	0	0	0	1.8163e-05
Labilibacter	0	0	0	0	0	1.21087e-05
Labilithrix	0	7.02645e-06	1.32033e-05	5.90985e-05	0	0
Labrenzia	0	0	1.54038e-05	0	0	0.00128248
Labrys	2.65786e-05	0.00012417	0.000228399	0.000344812	0.00100095	8.63072e-05
Lachnoanaerobaculum	0	0.0019726	0.00454436	0.00584842	0.000198789	0.000346223
Lachnobacterium	0	0	1.02609e-05	1.66358e-05	0	3.02717e-05
Lachnoclostridium	6.97688e-05	0.00128472	0.00246175	0.00217329	0.0028899	0.0122617
Lachnospira	4.86611e-05	0.0010335	0.00271791	0.00307344	0.00161254	0.00378273
Lachnospiraceae_AC2044_group	0	0.000158163	0.000346358	0.000348209	3.80356e-05	0.00231485
Lachnospiraceae_FCS020_group	0	3.75119e-05	0.000217389	0.000142928	0	0.000838273
Lachnospiraceae_FE2018_group	0	0	0	0	0	1.8163e-05
Lachnospiraceae_NC2004_group	0	6.16221e-06	7.86014e-05	0.000113084	0.000330867	0.00117491
Lachnospiraceae_ND3007_group	0	0.000178347	0.000320906	0.000318547	0.000416842	0.00332065
Lachnospiraceae_NK3A20_group	0.000262631	0.000364438	0.000644617	0.000699999	0.00137284	0.00505325
Lachnospiraceae_NK4A136_group	0.000219992	0.0194422	0.0412908	0.0430964	0.022207	0.0728808
Lachnospiraceae_NK4B4_group	0	2.05407e-05	3.82111e-05	3.17841e-05	0	0.0014623
Lachnospiraceae_UCG_001	0	0.000479936	0.000830117	0.00090297	0.000476583	0.00158958
Lachnospiraceae_UCG_002	0	0	0	8.96047e-06	0	0.000145326
Lachnospiraceae_UCG_003	0	0	0	2.09186e-05	0	0
Lachnospiraceae_UCG_004	0	2.62533e-05	0.000168143	0.000262189	0.00180517	0.000235053
Lachnospiraceae_UCG_006	0	0.00069467	0.00120619	0.00133628	0.000526615	0.00279307
Lachnospiraceae_UCG_007	0	0	1.76044e-05	1.79303e-05	0	0
Lachnospiraceae_UCG_008	0	4.92602e-05	8.62394e-05	6.891e-05	0	0.00227475
Lachnospiraceae_UCG_009	0	6.82855e-05	0.00011916	8.29765e-05	0	0.000664138
Lachnospiraceae_UCG_010	0	0.000131198	0.000231783	0.000292513	0.000856798	0.000319874
Lachnospiraceae_XPB1014_group	0.000241865	0.000578237	0.00090436	0.000876658	0.000703143	0.00719253
Lachnotalea	0	0	0	0	0	2.72446e-05
Lacibacter	4.49179e-05	7.72032e-05	0.000169059	0.000122436	0.00101181	0.000174194
Lacihabitans	0	0	0	0	0.000166006	0.000132741
Lacticaseibacillus	1.42167e-05	0.000100501	0.000473451	0.000308491	0.000371825	1.21087e-05
Lactiplantibacillus	7.97358e-05	0.0011874	0.00468066	0.00348699	0.00232579	0.0012282
Lactobacillus	0.00106291	0.00135186	0.00407736	0.003226	0.0118315	0.00674108
Lactococcus	0	0.00359173	0.00519746	0.00523553	0.0029209	0.00147483
Lactonifactor	0	0	0	0	0	2.11902e-05
Lacunisphaera	0.00041437	0	0	0	0.000547133	0
Lampropedia	0	0	1.32033e-05	0	0	0
Lapidilactobacillus	3.65456e-05	2.07112e-05	1.23131e-05	0.000103257	0	0
Larkinella	0	0	3.45532e-05	4.88529e-05	0	0
Latilactobacillus	0.000137987	0.000470113	0.00130771	0.00102643	0.0014746	0.000634777
Lautropia	6.76058e-05	0.00114873	0.00187787	0.00193898	0.000553715	0.00109888
Lawsonella	0	0	0	0	1.22064e-05	0
Lawsonia	0	0	0	0	0	3.33654e-05
Leadbetterella	0	2.1405e-05	1.23131e-05	2.60246e-05	0	3.0438e-05
Lechevalieria	0.000155097	0.000274357	0.000171442	0.000132681	0	0.000389648
Leeia	0	5.99916e-05	0.000170697	0.000225508	0.00010637	0
Legionella	0.000307275	0.000725327	0.000349664	0.000294869	0.000873398	0.000339065
Leifsonia	0	1.17108e-05	0.000106874	7.55154e-05	0	9.26619e-05
Lentibacillus	0	1.23244e-05	6.60165e-06	0	0	0
Lentibacter	0	0	0	0	0	0.00125626
Lentilactobacillus	0	0.00085235	0.00339897	0.00274743	0.000196098	0.000281608
Lentilitoribacter	0	0	0	0	0	5.67459e-05
Lentimicrobium	0	0.000459947	0.00174253	0.00170091	2.37147e-05	0.000467608
Lentimonas	0	0	0	0	0	1.21087e-05
Leptolyngbya_EcFYyyy_00	0	0	0	0	0	2.34814e-05
Leptolyngbya_PCC_6306	0	0	0	0	8.71884e-05	0
Leptonema	0	3.92805e-05	0.000173286	0.000149359	0	4.26132e-05
Leptospirillum	0	0.000473297	0.00111206	0.00107367	0.000823325	6.26507e-05
Leptotrichia	7.48632e-06	0.000291767	0.00203351	0.0013048	0.00151899	0.000274883
Leucobacter	0.000202588	1.23244e-05	7.44971e-05	0	0	5.7749e-05
Leuconostoc	4.57152e-05	0.000562318	0.00126467	0.00109388	0.00306379	0.000472592
Leucothrix	0	0	0	0	0.000115089	0
Levilactobacillus	5.61474e-05	6.22047e-05	0.000192946	0.000163835	0.000311883	7.58622e-05
Lewinella	0	6.16221e-06	1.4719e-05	8.31788e-06	0	9.29047e-05
Libanicoccus	0	0	0	0	0.000537386	0
Ligilactobacillus	0.00048083	0.0173665	0.0608181	0.049536	0.00826457	0.114758
Limibaculum	0.00134152	0.003008	0.000154527	3.04989e-05	0.000450583	0.000934498
Limimaricola	0	0	0	0	0	9.20767e-05
Limnobacter	7.47156e-05	0.00326488	0.00624898	0.00680636	0.00124307	0.00159882
Limnochorda	0	6.16221e-05	8.20875e-06	0	0.000528362	6.05002e-05
Limnohabitans	0	0.000131461	8.79971e-05	2.77263e-05	0.000823596	0
Limosilactobacillus	0	0.00017955	0.00081656	0.000717456	0.000434972	3.6008e-05
Liquorilactobacillus	0	0.00103789	0.0028222	0.00320489	0.000177861	0.000243968
Listeria	0	0	0	0	0.000449438	0.000210795
Litoreibacter	0	0	0	0	0.000171085	2.05462e-05
Litoribrevibacter	0	2.25948e-05	0	0	0	8.80553e-06
Litoricola	0	2.75672e-05	0.000128794	2.02714e-05	0	0.000816714
Litorilinea	1.9934e-05	7.4896e-05	5.36149e-05	7.16842e-05	0	3.33654e-05
Litorimicrobium	0	0	1.76044e-05	0	0	0
Litorimonas	0	0	0	0	0	4.40276e-05
Loigolactobacillus	0	0	0	0	0.000418749	0
Longilinea	0	0	0	0	0.00022101	0
Longimicrobium	0.000705481	0.000332251	0	4.39549e-05	8.19571e-05	7.55441e-05
Longispora	0.000188371	0.0174285	0.00332121	0.00339558	0.000196494	0.000110633
Longivirga	0	0	8.83143e-06	0	0	0.000116303
Luedemannella	0.000231022	0.000680103	8.20875e-06	0	1.35513e-05	8.38143e-05
Luminiphilus	0	0	2.20055e-05	0	0	9.40253e-05
Luteibacter	0	0.000202659	2.64066e-05	8.13013e-05	0.000284597	1.17407e-05
Luteimonas	0.0119689	0.0108292	0.00695876	0.00690761	0.000858793	0.0033174
Luteitalea	0.00214272	1.93509e-05	4.78186e-05	0	5.33827e-06	9.08152e-06
Luteococcus	0	0	0	0	0.000179705	4.17442e-05
Luteolibacter	0.00131038	0	1.02609e-05	0	0	1.17407e-05
Lutibacter	0	0	2.64943e-05	1.38631e-05	0.000108114	0.000181694
Lutimonas	4.31902e-05	7.76669e-06	0	0	0	0.000588525
Lysinibacillus	0	0.000137933	0.000547573	0.000457412	0.000493454	0.0113251
Lysobacter	0.015188	0.0500028	0.00596298	0.00641732	0.0050168	0.00490037
M2PT2_76_termite_group	0	0	8.8022e-06	0	0	8.80553e-06
MAT_CR_P4_C12	0	0	0	0	0	1.8163e-05
MB11C04_marine_group	0	0	0	0	3.48753e-05	9.13139e-06
MD3_55	0	0	1.10027e-05	0	0	0
ML310M_34	0	0	0	0	0	9.08152e-06
MM1	0	0	0	0	0	4.5657e-05
MM2	0.0106744	0.00200278	0.000369342	0.000492626	0	0.000126679
MND1	0.0158746	0.12185	0.00889816	0.00920256	0.010101	0.00641771
MSBL7	0	0	0	0	0	4.17442e-05
Macellibacteroides	0	0.000137113	0.000346006	0.000222337	0	0.000328385
Macrococcus	0	0.000690203	0.00127883	0.00174272	0	0.000195109
Mageeibacillus	0	2.81433e-05	0.000153157	0.000133993	6.76181e-05	0
Magnetospira	0	0	0	0	0	5.06583e-05
Magnetospirillum	0	0.000101076	0.000304429	0.000304682	0.000300213	0.000122959
Magnetovibrio	0	0	0	0	0	7.75106e-05
Mailhella	0	4.31355e-05	0	1.19473e-05	0	0.0006166
Malaciobacter	0	1.23244e-05	1.23131e-05	2.68814e-05	0	0
Malikia	0	0	1.32033e-05	0	0	5.78321e-05
Mangrovibacter	0	1.64326e-05	0	0	0	0
Mangrovibacterium	0	0	0	0	0	1.21752e-05
Mangroviflexus	0	8.21629e-06	0	0	0	2.73942e-05
Mannheimia	0	0	0	0	0	1.46759e-05
Maribacter	0	7.76669e-06	5.65587e-05	1.19473e-05	0.000198789	0.000188619
Maribius	0	0	0	0	0	1.17407e-05
Maricaulis	9.96698e-06	6.23338e-05	0	0	0	1.21087e-05
Maricurvus	0	1.23244e-05	0	0	0	0
Marimicrobium	0	0	0	0	0	1.21752e-05
Marine_Methylotrophic_Group_3	0	0	0	0	0	3.81573e-05
Marinibaculum_pumilum	0	1.43785e-05	0	0	0	0
Marinicaulis	0	0	0	0	0	2.05462e-05
Marinicella	1.32893e-05	7.02645e-06	6.11096e-05	4.18341e-05	0	3.32989e-05
Marinifilum	0	1.99709e-05	0.000107471	0.000116064	0	5.67459e-05
Mariniflexile	0	0	0	0	0	4.5524e-05
Marinilactibacillus	0	6.16221e-06	0	0	0	4.23804e-05
Marinimicrobium	0	0.00130882	0.000116664	0.000297874	0.000391293	9.80557e-05
Mariniphaga	0	0.000477696	0.00143407	0.00141641	0	0
Mariniradius	0	0	3.03626e-05	3.19983e-05	0	4.85179e-05
Marinobacter	0	6.71293e-05	3.66968e-05	4.33107e-05	0.000777384	0.00239346
Marinobacterium	0	0.000239343	0.00149028	0.00094343	0.000946876	0.00114256
Marinomonas	0	7.76669e-06	4.03268e-05	4.24524e-05	0	9.67509e-05
Marinoscillum	0	0	0	0	0	2.05462e-05
Marinospirillum	0	0	1.90631e-05	1.17378e-05	0	1.8163e-05
Mariprofundus	0	0	0	0	0	1.8163e-05
Marispirillum	0	0	0	0	0	2.34814e-05
Maritalea	0	0	0	0	0	4.77232e-05
Maritimimonas	0	0	0	0	0	6.87793e-05
Marivita	0	0.000327023	0.000233894	0.00023851	0.000570263	0.0371334
Marivivens	0	0	1.10027e-05	0	0.00033	4.81577e-05
Marixanthomonas	0	0	8.8022e-06	1.19535e-05	0	0
Marmoricola	3.98679e-05	0.000141731	0	0	0.000412824	2.64166e-05
Martelella	0	0	0	0	0.000139501	0
Marvinbryantia	0	0.00019861	0.00034713	0.000466201	0.000394786	0.00553698
Massilia	0.0064485	0.00764155	0.00328971	0.00282531	0.0106059	0.00546741
Megamonas	7.22938e-05	0	4.52022e-05	2.3907e-05	0.00105044	6.85953e-05
Megasphaera	0	0.000562754	0.00192031	0.00176103	0.0198623	0.000261697
Meiothermus	0	6.16221e-06	0	0	0	0
Melghirimyces	0	3.45936e-05	4.14888e-05	3.20091e-05	0	8.80553e-06
Membranicola	0	0.00182202	0.000456578	0.000412412	0.000336547	2.42174e-05
Merdibacter	0	0	2.94381e-05	0	0.000111601	4.81588e-05
Mesorhizobium	0.00755274	0.00539232	0.00140964	0.00117179	0.00387688	0.0015283
Mesotoga	4.31902e-05	0	0	0	0	0
Metallibacterium	0	0	0	0	0.000405708	0
Methanocalculus	0	0	0	0	0	3.52221e-05
Methanospirillum	0	0	0	0	0	1.46759e-05
Methylibium	0.000132893	8.02558e-05	7.06514e-05	2.68814e-05	0.000388332	2.05462e-05
Methylobacillus	0.00949726	0.00110491	0.000273208	0.000302109	0	0.000120082
Methylobacter	0	0	0	1.38631e-05	0.000160427	0
Methylobacterium_Methylorubrum	0.00470701	0.000182554	0.00067018	0.000721517	0.00596515	0.00838791
Methylocaldum	0	0	0	0	0	2.05462e-05
Methylocapsa	0	0	0	2.68814e-05	0	0
Methyloceanibacter	0	1.02704e-05	0	0	0	0.000105623
Methylocella	0	6.88616e-05	0	0	0.000139219	3.94696e-05
Methylocystis	0	0	6.37026e-05	0	0.000284577	0.000301244
Methyloglobulus	0	0	0	0	0	2.13066e-05
Methylomicrobium	0	1.03556e-05	4.69869e-05	0	0	0
Methylomonas	0	0	1.54038e-05	1.79209e-05	0.00152269	5.04411e-05
Methylonatrum	0	0	0	8.31788e-06	0	0
Methyloparacoccus	0	4.6843e-06	1.54331e-05	0	0.000282847	2.08721e-05
Methylophaga	0	0.000203353	3.43186e-05	3.52133e-05	0	0.00487422
Methylophilus	0.00147761	0.000177929	9.45352e-05	0.000242504	0.000357839	2.64166e-05
Methylopila	0.00595012	0.000300803	0.000114779	0	0	0.000157343
Methylosarcina	0	0	0	0	0	2.13066e-05
Methylotenera	4.98349e-05	0.000179256	0.000195001	0.000287604	0.000757384	0.00046154
Methyloterricola	0	0	0	0	0	1.21087e-05
Methyloversatilis	0	0	7.44971e-05	1.19535e-05	0.000331042	0.000449235
Methylovirgula	0	0	1.10027e-05	1.10905e-05	0.000142354	0
Mf105b01	0	0	0	0	0	0.00042518
Microbacter	0	0	0	8.96513e-06	0	0
Microbacterium	0.0013969	0.000181246	8.87674e-05	5.67791e-05	0.0050766	0.00179013
Microbulbifer	0	0	2.498e-05	8.96513e-06	0	8.07461e-05
Micrococcus	0	0	0	0	0	0.00147994
Microlunatus	0	0.000157172	2.52489e-05	9.25982e-05	0	0.000132409
Micromonospora	0	0.000232901	0.000103796	0.000201192	0.00294206	0.00127424
Micropepsis	0	1.03556e-05	6.64951e-05	3.60441e-05	0.000923912	1.82628e-05
Micropruina	0	0	0	0	0	2.05462e-05
Microvirga	0.00142855	0.00156186	0.000416782	0.000267556	0.00149448	0.000752619
Microvirgula	0	0	1.54038e-05	1.19535e-05	0	0
Minicystis	0	0	0	0	0.000154413	2.43504e-05
Mitsuokella	0	0.000185477	0.000451987	0.000381053	0.000118576	3.34818e-05
Mizugakiibacter	0	9.3686e-06	4.97517e-05	5.29138e-05	0.000195737	2.09142e-05
Mobiluncus	0	0	8.27021e-05	8.74751e-05	7.29563e-05	0
Modestobacter	0	0	0	0	0	0.00020755
Mogibacterium	0	6.79199e-05	0.000219081	0.000198025	3.91473e-05	0.000518459
Moheibacter	0	0.000492666	0.000184882	0.000136792	0	0.000710825
Monoglobus	9.31138e-05	0.000685958	0.00117665	0.000989491	0.0055792	0.0100319
Moorella	0	0	0	8.31788e-06	0	0
Moraxella	0	0.000725718	0.0012354	0.00114734	0	0.0142374
Morganella	0	0.000293542	0.0011922	0.000975911	0.000429844	0.00101575
Moritella	0	0	0	0	0	8.80553e-06
Moryella	0	6.8854e-05	9.79656e-05	1.66358e-05	0	0.00183184
Motilimonas	0	0	2.81913e-05	0	0	0
Mucilaginibacter	2.65786e-05	0.000335277	0.00107296	0.00116387	0.00423105	0.000461947
Mucispirillum	0	0.00102667	0.00168516	0.00131811	0.00118608	0.00172909
Murdochiella	0	0	1.73369e-05	2.8805e-05	6.77564e-06	8.68836e-05
Muribacter	0	0	0	0	0	2.64166e-05
Muribaculum	0	0.000200935	0.000352012	0.000314276	0.000296736	0.00165132
Muricauda	0	0	0	1.19535e-05	0	0.000179388
Muriicola	0	0	0	0	0	2.05462e-05
Mycoavidus	0	0	0	0	2.54087e-05	0
Mycobacterium	0.00227288	0.00134499	0.00229824	0.00210191	0.00282571	0.00318442
Mycoplasma	3.55418e-06	0.00151941	0.0012366	0.00139021	0.00274423	0.00257553
Myroides	9.96698e-06	0.000218766	0.000232042	0.000309357	1.06765e-05	0.000275971
Myxococcus	0.000261842	6.70569e-05	0	0	0	2.64166e-05
NK4A214_group	0.000238605	0.00362487	0.0081295	0.00779053	0.00474725	0.0215502
NS10_marine_group	0	0	6.15656e-06	0	0	8.95849e-05
NS3a_marine_group	0	2.46489e-05	4.92445e-05	6.52806e-05	0.000128118	0.000815128
NS4_marine_group	0	0	9.34674e-05	1.19535e-05	0.000272388	2.73277e-05
NS5_marine_group	0	0	5.50137e-05	2.0914e-05	0.000360281	0.000411698
Nakamurella	0	1.9927e-05	3.89835e-05	2.98838e-05	0.000331115	0.000102104
Nannocystis	0.00115697	0.00320574	0.000232858	0.000173677	0.000137558	0.000349399
Naumannella	0	0	0	0	2.79003e-05	0
Nautella	0	4.92977e-05	0	0	0.000344975	0.000543318
Negativibacillus	0	0.000436475	0.00148838	0.00143561	0.000464869	0.00229001
Negativicoccus	0	0	0	0	7.32382e-05	0
Neisseria	1.32893e-05	0.0132572	0.0497966	0.049455	0.00333885	0.00205381
Neoscardovia	0	0	8.8022e-06	0	0	0
Neptuniibacter	0	0	7.14605e-05	1.79209e-05	0	0.000162438
Neptunomonas	0	1.23244e-05	6.15656e-06	0	0	0
Nereida	0	0	0	0	0	3.0438e-05
Nesterenkonia	0	0.000125298	5.25486e-05	1.38631e-05	0.000142288	0
Nevskia	0	0	3.08661e-05	4.71574e-05	0.000247074	2.73942e-05
Niabella	0.000735021	0.00236263	7.63095e-05	2.77263e-05	0	2.73111e-05
Niastella	0.00538883	0.00677923	0.00139936	0.00117462	0.000721877	0.000296619
Nibribacter	0.000148933	0.000248475	4.87409e-05	1.49388e-05	0	5.71804e-05
Nitratireductor	0	0	0	0	0	6.69635e-05
Nitriliruptor	0	3.03615e-05	1.92115e-05	2.30378e-05	0	1.8163e-05
Nitrincola	0	7.76669e-06	1.71593e-05	0	0	0.000244687
Nitrococcus	0	1.134e-05	1.70402e-05	1.19535e-05	0	0
Nitrolancea	0	1.64326e-05	8.67773e-05	4.41675e-05	0	3.6376e-05
Nitrosomonas	6.8765e-05	0.00183823	0.00325252	0.00345618	0.000140961	0.000235875
Nitrosospira	0.000300559	0.00208391	0.000337975	0.000346691	1.60148e-05	0.000192549
Nitrospira	0.00389827	0.168333	0.00891628	0.00885415	0.0126175	0.0065233
Niveispirillum	0	0	0	0	0.000303416	3.32989e-05
Niveitalea	0	0	0	2.62435e-05	0	0
Nocardia	1.06625e-05	6.16221e-06	1.49588e-05	0	1.95737e-05	1.82628e-05
Nocardioides	0.0207481	0.00104732	0.00190037	0.00192835	0.000976485	0.00244963
Nocardiopsis	0	4.663e-05	5.88762e-06	8.96513e-06	1.42354e-05	0
Nonlabens	0	0	0	0	0	0.000415117
Nonomuraea	0.000148367	3.31157e-05	0	8.31788e-06	0	0
Nordella	0.00150683	0.00600835	0.00162746	0.00170539	0.00164339	0.000660941
Nosocomiicoccus	0	1.40529e-05	9.03131e-05	2.28236e-05	0	0
Novibacillus	0	0.00050941	2.29278e-05	0	0	0.000177564
Noviherbaspirillum	0.000516547	0.00218385	0.000184771	0.000108792	0.00151104	0.000242413
Novispirillum	0	0	0	0	0	1.8163e-05
Novosphingobium	0.00145934	0.00180425	0.00276774	0.00310128	0.00499742	0.00240774
OLB12	0	1.91067e-05	8.32993e-05	2.3907e-05	0.000301516	0.000100262
OLB13	0.00017254	5.85551e-05	0.000341336	0.000321085	2.31325e-05	2.42673e-05
OLB15	0	0	0	0	0	0.000132592
OLB17	0	0	6.15656e-06	0	0	0
OLB8	0	1.40529e-05	2.53681e-05	3.58543e-05	0	0
OM182_bacterium_D4	0	0	0	0	0	0.000319385
OM27_clade	0.00322769	0.00602396	0.00131822	0.00153981	0.00090693	0.00172961
OM43_clade	0	3.69733e-05	8.09752e-05	1.49341e-05	0.00166605	0.00120953
OM60_NOR5__clade	0	9.56911e-05	0.00029429	0.000193481	0.000867718	0.00018729
OM75_clade	0	0	1.4988e-05	0	0	6.38366e-05
Oblitimonas	0	1.03556e-05	0.000181288	6.95635e-05	0	0.000262441
Occallatibacter	0	0	1.76044e-05	1.19535e-05	0.00570596	1.5219e-05
Oceanicaulis	0	0	0	0	0	3.22869e-05
Oceanicella	0.00031114	0.000460152	2.64943e-05	0	0	2.43504e-05
Oceanimonas	5.33127e-05	0.000389119	0.0012094	0.00138919	0	0
Oceanirhabdus	0	0	0	0	0	5.15783e-05
Oceanisphaera	0	0	0	1.19535e-05	4.06538e-05	8.3004e-05
Oceanobacillus	0	0.000615716	0.000643816	0.000646904	0	0.00200146
Oceanobacter	0	4.10814e-06	0.000102535	0.000116693	0	0
Oceanococcus	0	0	0	0	2.71026e-05	2.13066e-05
Ochrobactrum	7.10836e-05	0.0017337	0.00123844	0.00113231	0.000995186	0.000473513
Octadecabacter	0	0	0	1.49419e-05	0	4.76068e-05
Odoribacter	0	0.00108629	0.00221648	0.00210704	0.00139551	0.00188081
Oenococcus	0	2.5889e-06	0	5.97675e-06	0	0
Ohtaekwangia	0.0116331	0.00118283	0.000314961	0.00023384	0.000368341	0.000178627
Oikopleura	0	8.21629e-06	0	0	0	0
Oleibacter	0	5.13518e-05	0	0	0	0
Oleiphilus	0	0.000100649	2.79238e-05	1.7924e-05	0	9.08152e-06
Oleispira	0	0	6.60165e-06	0	0	5.1002e-05
Oligella	0	1.02704e-05	0	0	0	0.00086458
Oligoflexus	8.97471e-05	0.000111103	9.3824e-05	5.63414e-05	0	6.31594e-05
Oligosphaera	0	0	4.78785e-05	0.000152159	0	0
Olivibacter	0.000510772	0.000493125	7.54471e-05	3.88365e-05	0	0.000162429
Olleya	0	0	0	0	0	1.76111e-05
Olsenella	0	0	3.21473e-05	1.66358e-05	1.60148e-05	8.19831e-05
Opitutus	0.000766053	8.78755e-05	7.34227e-05	3.17872e-05	0.000847056	2.12567e-05
Oribacterium	0	0.00231448	0.00544779	0.00569897	0.000395032	0.000937874
Ornithinibacillus	0	0.000129406	2.66784e-05	7.4893e-05	0	0
Ornithinicoccus	0	0.000184866	0.00012353	0.000127174	0	0
Ornithinimicrobium	0	0	2.79238e-05	0	0	7.46917e-05
Ornithobacterium	0	1.63951e-05	9.579e-05	8.49167e-05	0	1.76111e-05
Oryzihumus	0	5.13518e-05	6.15656e-06	0	0	0
Oscillibacter	1.77709e-05	0.00136565	0.00429415	0.00402887	0.00492544	0.00361667
Oscillospira	0	0	4.03268e-05	0	0.000500461	9.98357e-05
Otariodibacter	0	0	0	8.31788e-06	0	3.02717e-05
Ottowia	0	0.000133663	0.000354681	0.00032198	0.000106905	0.000317615
Owenweeksia	0	0.00024238	0	1.94084e-05	0	0.000107874
Oxalobacter	0	0	0	3.04989e-05	0.000696275	8.90418e-05
Oxobacter	0	7.76669e-06	5.01997e-05	5.60951e-05	0	6.31594e-05
P3OB_42	0.00721932	0.0181744	0.00726905	0.00790925	0.00532009	0.00183322
PMMR1	0	0	1.23131e-05	0	0	8.20828e-05
Pacificibacter	0	0	0	0	0	7.68666e-05
Paenalcaligenes	0	0.000110943	0.000172305	0.000228507	0	0.00223723
Paenarthrobacter	0	0	0	0	9.24197e-05	0
Paenibacillus	0.00240428	0.0116467	0.000412882	0.000405798	0.00473613	0.000748464
Paeniclostridium	0	0.000150834	0.000438895	0.000378712	0.000712285	4.86509e-05
Paeniglutamicibacter	0	0	0	0	6.05004e-05	0
Paenisporosarcina	0	6.56553e-05	0	0	0	0.000485572
Paenochrobactrum	0	2.06259e-05	0.000128943	0.000112202	0	3.34153e-05
Pajaroellobacter	0.000490966	0.00865738	0.00194049	0.00187405	0.0083918	0.0013139
Palleronia_Pseudomaribius	0	0	0	0	0	2.34814e-05
Paludibacter	0	0.000183131	0.000495169	0.000612135	0	0.000236326
Paludibacterium	0	4.44583e-05	4.06235e-05	0	0	0
Paludicola	0	1.23244e-05	0.000113541	0.000130559	3.20296e-05	0.000207048
Panacagrimonas	0.0010047	0.000145994	0.000203832	0.000187745	0	0.000105297
Pandoraea	9.96698e-06	1.02704e-05	0	8.31788e-06	2.37147e-05	0.000268146
Pannonibacter	0	4.31355e-05	0	0	0	0
Pantoea	0.000603206	0.00231174	0.00276031	0.00197401	0.00329657	0.00376973
Papillibacter	3.11634e-05	0.000356381	0.0009841	0.000869633	5.48892e-05	0.00102987
Parabacteroides	0.000183614	0.00386447	0.00815081	0.00739494	0.00835001	0.0123513
Parablastomonas	0	0	3.48872e-05	0	0	0
Paraclostridium	0	9.65414e-05	0.000135252	2.09124e-05	0.00145797	1.82628e-05
Paracoccus	0.00348642	0.00191483	0.00220252	0.0023318	0.00451084	0.00800872
Parafilimonas	0	6.67714e-05	0.000216193	0.000381687	0.000768947	3.22869e-05
Paraglaciecola	0	0	0	2.3044e-05	0	0.000137518
Parahaliea	0	0	0	0	0	3.03881e-05
Paralcaligenes	0	2.93771e-05	0.000126267	0.000136752	0	0
Parapedobacter	3.98679e-05	0.00150984	0.000100667	0.000168553	0	0.00025702
Paraperlucidibaca	0	0	0	0	0	0.000331019
Paraprevotella	0	0.00024121	0.000382702	0.00024663	0.000699251	0.00141755
Parapusillimonas	0	0.000145839	6.75907e-05	6.57272e-05	1.52452e-05	1.82628e-05
Parasegetibacter	6.07293e-05	2.81058e-05	0.000124367	4.26604e-05	0	5.64201e-05
Parasphingopyxis	0	0	1.02609e-05	0	0	1.8163e-05
Parasutterella	5.19216e-05	0.00163318	0.0040333	0.00391444	0.00544632	0.0117683
Parvibacter	0	0	0	8.96513e-06	0	0.00010849
Parvibaculum	0	0.000271274	7.93381e-05	0.000161504	6.10319e-05	0.0001083
Parvimonas	0	0.000482388	0.00171536	0.00172129	1.06765e-05	0.000655154
Parviterribacter	0.000366328	0.000373623	4.43384e-05	0	0	7.81867e-05
Parvularcula	0	0	1.32033e-05	8.96047e-06	0	2.72944e-05
Pasteurella	0	0.00619056	0.0256623	0.0266385	0.000127043	5.47883e-05
Pasteurella_sp._37234	0	0	0	0	0.000361223	0
Pasteuria	0	0	0	0	9.59072e-05	1.46759e-05
Patulibacter	4.26501e-05	1.29445e-05	8.20875e-06	8.96513e-06	0	4.24802e-05
Paucilactobacillus	0	0	8.43129e-05	5.2698e-05	0.000256334	0
Paucisalibacillus	0	0.000236218	0.000149348	6.57225e-05	2.03269e-05	0
Pectinatus	0	0	1.10027e-05	0	0	0
Pectobacterium	0	0	0	0	0	0.00556168
Pediococcus	7.27844e-05	0.000234354	0.00075487	0.000614016	0.000932236	0.0001492
Pedobacter	0.000189839	0.00160603	0.00105771	0.00100494	0.00422487	0.00117701
Pedococcus_Phycicoccus	6.31242e-05	0	0	0	0	0
Pedomicrobium	0.000519679	0.0044576	0.00134487	0.0014914	0.00129183	0.000833248
Pedosphaera	0	0	0	0	0.00087871	0
Pelagibacterium	0	0.00553504	0.00242307	0.00262007	0.000263355	0.000372486
Pelagibius	0.000244525	0.000581996	5.24916e-05	1.79209e-05	0	0.000305014
Pelagicoccus	0	0.000205407	0	0	0	0
Pelobacter_sp._A3b3	0	0	0	8.96047e-06	0	0.000158816
Pelomonas	0	1.87372e-05	0	4.82134e-05	0.000932337	3.95694e-05
Pelospora	0	0	8.17813e-05	8.04289e-05	0	0
Pelotomaculum	0	0.000198502	0.000472186	0.000561969	0	0
Peptoclostridium	0	0	0	0	0.00347715	0.000162603
Peptococcus	0	7.35072e-05	0.000509242	0.000309816	0.000589025	0.000236978
Peptoniphilus	0	0.000261979	0.000883324	0.000968641	0.00141632	0.000548936
Peptostreptococcus	0	0.000762858	0.00198903	0.00206594	0.000885946	0.000766473
Peredibacter	0.00820843	0.000754816	0.000182423	0.000237893	0.000250899	0.000162212
Permianibacter	0	1.29445e-05	4.18981e-05	3.49851e-05	0	1.82628e-05
Persicitalea	2.84334e-05	0.000315558	0.000242454	0.000317052	0.000158369	7.18064e-05
Petrimonas	0	0.000630406	0.00126454	0.00131301	0.000442917	0.0012417
Phaeodactylibacter	0	0.000114414	3.71433e-05	6.78619e-05	1.60148e-05	5.91635e-05
Phascolarctobacterium	0.000313116	0	6.49465e-05	7.46938e-05	0.00176557	0.00024749
Phaselicystis	0.00106349	0.00125934	0.000579169	0.000483268	0.000501403	0.000539671
Phenylobacterium	0.00986916	0.00351612	0.00188501	0.00197133	0.00436949	0.00185379
Phocaeicola	0	5.17779e-06	2.79238e-05	4.90717e-05	0	0
Phocea	0	0	1.76044e-05	0	0.000854123	3.03549e-05
Phoenicibacter	0	0	0	0	0	2.13066e-05
Photobacterium	0	0.000383215	0.000800576	0.00104561	0.00308749	0.000627898
Phreatobacter	0.000377256	0.000166049	4.40987e-05	5.1627e-05	0.000405741	0.000397883
Phycisphaera	0.000160956	0.000134858	1.9984e-05	8.31788e-06	0	0
Phyllobacterium	0.000537077	0.00678177	0.000379322	0.000352882	0	0.000824975
Phytoactinopolyspora	0	6.16221e-06	0	0	0	0
Pigmentiphaga	0	1.64326e-05	0	0	0	2.73942e-05
Pirellula	2.84334e-05	0	0	0	0	9.08152e-06
Piscinibacter	5.98019e-05	1.87372e-05	3.34284e-05	3.77577e-05	0.000424418	0.000192808
Planctomicrobium	0	8.21629e-06	2.86071e-05	3.54135e-05	0	0
Planifilum	0	1.31887e-05	0	1.66358e-05	0	0.000347676
Planktomarina	0	0	7.37794e-05	5.11924e-05	0	0.00241513
Planktosalinus	0	0.000740535	0.000225742	0.000234684	0.000275811	0.000109577
Planktotalea	0	0	0	0	1.60148e-05	0.000189146
Planococcus	0	0	5.33569e-05	9.81388e-05	0.00016446	0.000642527
Planomicrobium	0.00015381	7.02645e-06	0.000112318	1.79303e-05	0	6.28335e-05
Plasticicumulans	0	0	8.20875e-06	0	0	0
Pleomorphomonas	0	1.43785e-05	7.01252e-05	5.6762e-05	0.000141481	0.000108516
Plesiomonas	0	0.000631485	0.00104946	0.00125477	0.000275515	0.00911083
Polaribacter	0	1.63951e-05	3.4467e-05	1.19535e-05	0	0.000881473
Polaromonas	0.000540923	0.00031088	4.06235e-05	0.000102183	0.000377086	0.000135042
Polyangium	0.00121724	0.000661839	6.60165e-06	2.28283e-05	0	4.51316e-05
Polycyclovorans	0.000275987	0.000570995	0.00064962	0.00057007	0.00106708	0.000670006
Polymorphobacter	0	0	0	2.38992e-05	0	0
Polynucleobacter	0	3.90274e-05	7.37765e-05	4.33076e-05	0.00282122	0.000370278
Pontibaca	0	1.02704e-05	0	0	0	0
Pontibacter	0.00056577	0.00120021	0.000143487	0.000104333	4.07841e-05	0.000437606
Ponticaulis	0	2.46489e-05	0	0	0	0
Ponticoccus	0	0	0	0	5.2313e-05	0
Porphyrobacter	0	3.28651e-05	1.02609e-05	0	0	9.31064e-05
Porphyromonadaceae_bacterium_C941	0	0	0	8.96047e-06	0	0
Porphyromonas	0	0.00315101	0.00777872	0.00751749	0.00191393	0.000809702
Portibacter	0	0.000167523	0.000548525	0.000957496	0	5.41876e-05
Porticoccus	9.76636e-05	0.000108141	4.21963e-05	1.19473e-05	0	0.000212876
Poseidonibacter	0	0	0	8.96047e-06	0	0
Povalibacter	0	0	2.99175e-05	0	0	0
Prauserella	0	2.67029e-05	0	0	5.33827e-05	0
Prevotella	8.30436e-05	0.0153842	0.0303462	0.032095	0.00919782	0.0412681
Prevotella_7	0	0.0225532	0.0704403	0.0737459	0.00195847	0.00163771
Prevotella_9	0.000389642	0.00473545	0.0128574	0.0126432	0.00819949	0.00619991
Prevotellaceae_Ga6A1_group	1.77709e-05	0.000128642	0.000217657	0.000277609	0.000595594	0.00422912
Prevotellaceae_NK3B31_group	0.000253892	0.000552083	0.00161128	0.00164731	0.00205275	0.00619414
Prevotellaceae_UCG_001	0.000110273	0.0046011	0.00821899	0.00875986	0.00311622	0.0170564
Prevotellaceae_UCG_003	0.000172562	0.00158998	0.00375037	0.00366759	0.000984625	0.00734777
Prevotellaceae_UCG_004	8.06662e-05	0.000383843	0.00136606	0.0011982	0.000789271	0.00115133
Prevotellaceae_YAB2003_group	0	0	2.05219e-05	0	0	3.22869e-05
Pricia	0	0	0	1.19535e-05	0	3.0438e-05
Procabacter	0	7.76669e-06	0	0	0	0
Promicromonospora	0.00030972	0	0	0	0	5.40036e-05
Propionibacterium	0	0	0	0	0	4.5657e-05
Propionicicella	0	0	0	0	0	2.64166e-05
Propioniciclava	0	0	1.17752e-05	0	7.82946e-05	6.06765e-05
Propionicimonas	0	0	0	0	0	2.43504e-05
Propionigenium	0	0	0	0	0	9.9552e-05
Propionimicrobium	0	9.3686e-06	1.90631e-05	1.94084e-05	0	0
Propionispira	0	0	0	0	0.000121962	0
Propionivibrio	0	2.33001e-05	6.24463e-05	7.46783e-05	0	7.82698e-05
Prosthecobacter	1.32893e-05	0	0	0	6.42701e-05	1.21087e-05
Prosthecomicrobium	0	0	0	8.96513e-06	0	0
Proteiniborus	0	2.25948e-05	0	0	0	0
Proteiniclasticum	0	0.000403783	0.00108139	0.00109589	0.000452825	0.000328478
Proteiniphilum	0	0.00937168	0.0252187	0.026523	0.000773385	0.000538388
Proteobacteria_bacterium_B210	0	3.08111e-05	0	0	0	0
Proteobacteria_bacterium_SEH01	0	6.16221e-06	0	0	0	0
Proteocatella	0	0	0	1.66358e-05	0	0.000164116
Proteus	9.91755e-05	0.00063202	0.00238683	0.00223436	0.000708512	0.000228398
Providencia	0	0.000228017	0.000178399	0.000246205	0	0.00024175
Pseudahrensia	0	0	1.64175e-05	3.58419e-05	0	2.43504e-05
Pseudanabaena_PCC_7429	0	0	0	0	5.25112e-05	0
Pseudarcicella	0	6.16221e-06	4.00871e-05	0	0.000541009	0
Pseudarcobacter	1.32893e-05	7.03771e-05	0.000205698	0.000244087	0.000151708	0.000155421
Pseudarthrobacter	0	1.17108e-05	8.53704e-05	0.000110542	1.95737e-05	0
Pseudenhygromyxa	0	7.2683e-05	0	1.79303e-05	0	7.50509e-05
Pseudoalteromonas	0	0.00010001	0.000349154	0.00046707	0.00101222	0.00659204
Pseudobacteriovorax	0	0	6.60165e-06	1.19473e-05	0	0
Pseudobacteroides	0	1.40529e-05	1.17752e-05	0	0	0
Pseudobutyrivibrio	0	0.000207275	0.000324262	0.000308094	0.000174377	0.0014711
Pseudochrobactrum	0	1.87372e-05	0	0	0.000284577	0
Pseudocitrobacter	0	0.00012119	0.000355583	0.000299334	0.000631244	0
Pseudoclostridium	0	0	0	0	0	1.46759e-05
Pseudoduganella	0	0	4.2558e-05	0	0	0
Pseudoflavitalea	0.00124483	0.00172711	7.05981e-05	8.78854e-05	0.000679739	5.94894e-05
Pseudoflavonifractor	0	0	0	3.43425e-05	0	0
Pseudofulvibacter	0	0	0	0	0	4.72887e-05
Pseudofulvimonas	0.000462084	0.000258815	0.000122458	0	0	0.000137342
Pseudogracilibacillus	0	1.17108e-05	0.000124366	6.8269e-05	0	0.00129784
Pseudogulbenkiania	0	0.000694448	0.00233695	0.00288333	0	5.67803e-05
Pseudohalocynthiibacter	0	0	0	1.10905e-05	0	0
Pseudohongiella	0	0.00028819	0.000128735	9.64434e-05	0.00119828	0.000553481
Pseudolabrys	0.000253516	0.00273583	0.00132823	0.00147186	0.00242971	0.00102994
Pseudomonas	0.0334583	0.0200338	0.021779	0.0194074	0.0202771	0.0210368
Pseudonocardia	0.00491416	0.000226278	0.000156245	0.000165357	0.000249054	0.000931997
Pseudopedobacter	0	0	0	0	0	1.21087e-05
Pseudophaeobacter	0	0	2.2778e-05	0	0	0.00073837
Pseudopropionibacterium	0	0	1.17752e-05	0	0	0
Pseudoramibacter	0	2.5889e-05	7.78596e-05	9.32361e-05	0	0.000144925
Pseudorhizobium	0	2.67029e-05	0	3.58605e-05	0	0
Pseudorhodobacter	0	7.80547e-05	1.64175e-05	0	0	5.9138e-05
Pseudorhodoferax	0.00251217	0.000363425	0	3.88168e-05	0	0.000180281
Pseudorhodoplanes	0.000359798	0.000318104	9.53741e-05	7.76656e-05	0	0.000111729
Pseudoruegeria	0	1.87372e-05	2.86071e-05	9.02664e-05	0	0.00022165
Pseudoxanthobacter	0	0	0	0	0.000996477	6.06432e-05
Pseudoxanthobacter_sp._S50	0	0	0	0	0.000695673	0
Pseudoxanthomonas	0.0256954	0.0224896	0.000922573	0.00089438	0.00179841	0.00468534
Psychrilyobacter	0	0	3.16094e-05	2.68954e-05	9.99407e-05	5.72148e-05
Psychrobacillus	0	0	1.10027e-05	0	0	3.02717e-05
Psychrobacter	1.32893e-05	0.0023118	0.00944983	0.00873955	0.00224428	0.0106068
Psychrobium	0	0	0	0	0	3.93533e-05
Psychroglaciecola	0	1.02704e-05	1.70402e-05	0	0	2.64166e-05
Psychromonas	0	1.02704e-05	0.000129388	0.000142094	0	0.000293841
Psychrosphaera	0	0	0	0	0	8.80553e-06
Puia	3.32233e-05	0.00249823	0.00110205	0.00105702	0.00636373	0.00016165
Pusillimonas	0	0.00211995	0.000468647	0.000387056	0	0.00108382
Pygmaiobacter	0	7.02645e-06	0.000161036	9.23793e-05	0	6.00835e-05
Pyramidobacter	0	0	0	1.7283e-05	0	0
Qipengyuania	0	0	0	5.37908e-05	0	0
Quadrisphaera	6.39752e-05	0	0	1.79256e-05	0	0
Quinella	2.99453e-05	0	0	0	0.000220648	0.000257383
RB41	0.00574772	2.52689e-05	0.000203706	0.000176017	0.00161225	0.000149008
RBG_16_49_21	0	0	4.37742e-05	4.58676e-05	0	9.08152e-06
RBG_16_58_14	0	0	0	0	6.97495e-05	0
RCP1_48	0	0	0	0	0	6.37535e-05
RS25G	0	0	6.60165e-06	0	0	0
RS62_marine_group	0	0	0	0	0	0.000173426
Rahnella1	0	0.000138019	0.00032379	0.00041243	0.000150013	0.000364058
Raineya	0	0	0	0	0	1.21087e-05
Ralstonia	9.96698e-06	0.000210443	0.000478515	0.000462568	0.000726112	0.000681413
Ramlibacter	0.0131217	0.00973309	0.0038142	0.00391192	0.00218017	0.00129589
Raoultibacter	0	1.17108e-05	0	0	0	2.11902e-05
Reinekea	0	0	0	0	0.000201075	0.000137249
Reyranella	0.00314541	0.00963187	0.00228089	0.00212274	0.00737881	0.00219484
Rhabdobacter	0	0	1.17752e-05	2.98744e-05	0	1.46759e-05
Rheinheimera	2.62021e-05	0.000200109	9.71837e-05	0.000202482	0.000301024	0.000372881
Rhizobacter	0.000262461	0.000615698	0.000821983	0.00103169	0.000162717	0.000622807
Rhizobiales_bacterium_GAS113	0	2.34215e-05	1.32033e-05	2.2181e-05	0.00024053	2.13066e-05
Rhizobiales_bacterium_GB6	2.13251e-05	1.17108e-05	0	0	0	0
Rhizocola	0	4.72151e-05	2.94381e-05	0	3.02502e-05	6.06432e-05
Rhizomicrobium	0	0	4.78785e-05	0	0	2.43005e-05
Rhizorhapis	0	0	5.20399e-05	2.09186e-05	0	3.0438e-05
Rhodanobacter	1.49726e-05	0.000707528	0.0025049	0.00229309	0.00876837	0.00169408
Rhodobacter	0	0.000141293	0.000223484	0.000205463	2.31325e-05	0.0041986
Rhodobaculum	0	4.92977e-05	0	0	0	0
Rhodoblastus	0	3.36557e-05	9.4028e-05	7.19046e-05	0	0.00034613
Rhodococcus	0.000458331	0	2.0967e-05	0	0.00125127	0.00334756
Rhodocytophaga	0.000347616	0.000222998	9.76938e-05	6.44482e-05	0.000135912	7.88728e-05
Rhodoferax	0	4.60538e-05	0.00022211	0.000155758	0.000225442	0.000237445
Rhodoligotrophos	0	1.23244e-05	0	0	0	0
Rhodomicrobium	0.00260889	0.000820559	0.000137843	7.25441e-05	0.000144733	0.00014832
Rhodopila	0	0	0	0	4.44856e-05	2.93518e-05
Rhodoplanes	0	0.000889789	0.000294235	0.000538845	0.00128828	0.000194154
Rhodopseudomonas	0	0	6.17615e-05	0	0.000115186	0.000424922
Rhodospirillaceae_bacterium_AW97	0	0	0	0	0	1.21087e-05
Rhodovastum	0	0	3.30082e-05	0	0.00048287	0
Rhodovulum	0	1.64326e-05	6.15656e-06	3.58481e-05	0	0
Rickettsia	1.42167e-05	0.000780712	0.002707	0.00293556	0.000818582	4.5657e-05
Rickettsiella	0	2.8757e-05	0.000100543	2.68861e-05	0.000123655	5.11183e-05
Rikenella	0	0.00139715	0.00373086	0.00398095	0.000252393	0.000742218
Rikenella_sp._Marseille_P3215	9.96698e-06	0.000112974	4.99571e-05	6.46577e-05	4.74295e-05	0.000453677
Rikenellaceae_RC9_gut_group	8.30581e-05	0.0067097	0.0204525	0.020723	0.01028	0.0528013
Rivibacter	0	0	9.22491e-05	7.48609e-05	0	0
Rivicola	0	6.16221e-06	0	0	0	0
Robertkochia	0	0	0	0	0	1.46759e-05
Robiginitalea	0	0	0	0	0	6.9247e-05
Robinsoniella	0	9.17471e-05	0.000146937	0.00014083	0	0.00640109
Rodentibacter	0	0.000253515	4.43676e-05	6.65612e-05	6.97507e-05	0.000724154
Romboutsia	0	0.00298669	0.00660054	0.00769464	0.00619269	0.01258
Roseateles	0	0	0	0	0	2.34814e-05
Roseburia	0	0.00230576	0.00591741	0.00576071	0.00455254	0.00766222
Roseiarcus	0	0.000208351	0.000309771	0.000142733	0.0115818	0.000312228
Roseibacterium	0	0	0	0	0	2.11902e-05
Roseiflexus	0	0	0	0	0	3.95694e-05
Roseimarinus	0	1.87372e-05	4.47571e-05	3.98877e-05	0	0
Roseimaritima	0	2.63773e-05	8.20875e-06	0	0	0
Roseimicrobium	0.000656931	0	0	0	0.000131068	7.52016e-05
Roseisolibacter	0.0001768	0.00160999	0.000134472	9.64402e-05	3.21843e-05	0.000379933
Rosenbergiella	0	0.000189038	0.0239379	0.000667591	0	0.00010273
Roseobacter	0	0	0	0	0	1.21087e-05
Roseobacter_clade_CHAB_I_5_lineage	0	0	0	0	0	3.52221e-05
Roseococcus	0	0	1.83769e-05	0	0	0
Roseomonas	0.000466428	0.000502038	0.000203978	2.38946e-05	0.000771385	0.00353856
Roseomonas_sp._OTB23	0	0	0	0	0	2.13066e-05
Roseovarius	0	8.21629e-06	0	2.09186e-05	6.58386e-05	4.78318e-05
Rothia	5.98906e-05	0.000842086	0.0041454	0.00304824	0.00121169	0.00200535
Rubellimicrobium	0.00340242	0.0030599	0.000329442	0.000187309	0.000680612	0.000614239
Rubidimonas	0	0	0	1.38631e-05	0	0
Rubribacterium	0	0	0	0	0	3.03881e-05
Rubrimonas	0	0	0	0	0	3.03549e-05
Rubritepida	3.36884e-05	0	0	0	0	6.84866e-05
Rubrivirga	0	0.000278415	0.000561037	0.000918633	0.000378398	2.93518e-05
Rubrivivax	0	0	0	0	0	0.00128948
Rubrobacter	0.000589969	0.000404229	8.53515e-05	8.3021e-05	0.000319755	0.000221415
Rudaea	0	3.6034e-05	1.76629e-05	6.33632e-05	6.93975e-05	9.08152e-06
Ruegeria	0	9.0016e-05	0.000303592	0.000350499	0.00131959	0.000584789
Rufibacter	0.000474518	8.25928e-05	1.76044e-05	0	0	0
Ruminiclostridium	0	0.000135545	0.000377771	0.000360806	0	0.000406537
Ruminobacter	0	0.00060055	0.00208638	0.00243508	3.3809e-05	0.00056103
Ruminococcus	0.000543553	0.00216983	0.00348499	0.00363227	0.00901053	0.0444629
Ruminofilibacter	0	0.00223688	1.98049e-05	0	0.000137758	0.000328377
Runella	0	7.02645e-06	2.7717e-05	1.19473e-05	0.000132028	0.000140311
Rurimicrobium	0	1.23244e-05	0	0	0	0
S50_wastewater_sludge_group	0	0	4.90683e-05	1.10905e-05	0	4.69628e-05
S5_A14a	0	0.000272666	0.000607822	0.000621544	0	4.40276e-05
SAR92_clade	0	0	0	0	0	0.000872165
SC103	0	0	3.45532e-05	1.7283e-05	0	0
SD04E11	0	0	0	0	0	2.13066e-05
SEEP_SRB1	0	0	0	0	0	0.000153715
SEEP_SRB4	0	0	0	1.79209e-05	0	3.29309e-05
SH3_11	2.84334e-05	0	0	0	1.01635e-05	0
SM1A02	9.61439e-05	0.0088912	0.00145509	0.00204829	0.00230952	0.00305219
SM23_31	0	0	0	0	0	2.11902e-05
SN8	0	0	0	2.02714e-05	0	0
SP3_e08	0	2.46113e-05	0.000116693	0.000138707	0.000206413	0.00236662
SUP05_cluster	0	0	0.000491172	0	0	6.59117e-05
SWB02	9.12494e-05	0.00101517	0.00214325	0.00222533	0.00167903	0.000784378
SZB85	0	5.21785e-05	0	0	0	1.82628e-05
Saccharibacillus	0	0	0	0	0.000519591	0
Saccharibacter	0	0	4.77565e-05	1.49419e-05	0	0
Saccharofermentans	7.10836e-06	0.000320157	0.000341814	0.000195856	0.00077836	0.00296081
Saccharomonospora	0	0.00108287	0.000200343	0.000147661	0	8.76107e-05
Saccharopolyspora	0	3.69733e-05	0	0	0.000404554	0.000105991
Saccharospirillum	0	0	1.4988e-05	0	0	3.03549e-05
Saccharothrix	0.000147206	6.08959e-05	0	2.55962e-05	0	5.0726e-05
Salinarimonas	0	0	0	0	0	1.8163e-05
Salinibacter	0	1.02704e-05	1.32033e-05	8.96513e-06	0	0
Salinicoccus	0	3.28651e-05	7.92256e-05	8.87681e-05	0	1.46759e-05
Salinicola	0	0.000110572	0.000476887	0.000487275	0	1.5219e-05
Salinimicrobium	1.06625e-05	0.000320435	0.000115914	4.82134e-05	2.13531e-05	0
Salinirepens	0	0	6.60165e-06	0	0	6.84866e-05
Salinisphaera	0	0	4.09203e-05	4.33154e-05	0	0
Salinispora	0	0.000215677	0	0	0	3.26128e-05
Salipaludibacillus	0	3.08111e-05	1.98049e-05	2.68814e-05	0	3.34153e-05
Sandaracinobacter	0	0.000175661	0	0	0	4.15525e-05
Sandaracinus	0.00313099	0.000836314	0.000492326	0.000339448	2.20208e-05	0.000289024
Sandarakinorhabdus	0	0	8.20875e-06	0	0	0
Sanguibacter_Flavimobilis	0	0	0	0	0	1.17407e-05
Sanguibacteroides	0	1.84866e-05	2.20362e-05	6.10252e-05	0	0.000140721
Sarcina	0	2.34215e-06	1.43653e-05	1.79303e-05	0	1.82628e-05
Savagea	0	0	0	1.10905e-05	0	0.000641267
Scardovia	0	0	8.83143e-06	2.0914e-05	5.2313e-05	9.08152e-06
Schlegelella	0	4.92977e-05	0	0	0	0
Schleiferilactobacillus	0	0.000785964	0.00280279	0.00320481	0.000251102	3.87004e-05
Schwartzia	0	0	0	0	0.000177942	3.94696e-05
Scopulibacillus	0	0	1.98049e-05	0	0	1.5219e-05
Secundilactobacillus	0	4.9189e-05	0.00028897	0.000181556	0	0
Sedimentibacter	0	0.00291702	0.00857628	0.00874819	0	0.000298749
Sedimenticola	0	0	0	0	0	9.08152e-06
Sediminibacterium	2.2459e-05	2.8757e-05	0.000198844	0.000243247	0.00052481	1.78871e-05
Sediminispirochaeta	0	6.16221e-06	0	0	0	2.11902e-05
Segetibacter	0	0.000192954	0.000731237	0.000625963	0.000466627	9.13139e-06
Selenomonadales_bacterium_Marseille_P2399	0	0	0	0	0	1.21087e-05
Selenomonas	0	2.55131e-05	0.000134863	0.000133142	0.000515636	0.00578185
Sellimonas	0	7.91746e-05	0.000189821	0.000179215	0.000174383	0.000483379
Senegalimassilia	0	0	1.17752e-05	0	0	1.5219e-05
Serratia	0.000336738	0.00025364	0.00149446	0.00109816	0.00141071	0.000596665
Sh765B_TzT_35	0	0	0	0	0.000566206	3.89176e-05
Sharpea	0	0.000170641	0.000550002	0.000569646	0.000229546	6.8378e-05
Shewanella	0	0.00021151	0.000354957	0.000423304	0.00415131	0.00143699
Shimia	0	0	1.10027e-05	0	0	4.10925e-05
Shinella	0.00227513	0.000660012	2.46262e-05	0	0.000174377	0.00124042
Shuttleworthia	0	9.3433e-05	0.00026919	0.000244304	0.000188965	0.000640506
Sideroxydans	0	0	2.46262e-05	5.37721e-05	0.000513158	0.000183316
Silanimonas	0	0	0	0	5.5899e-05	0
Silicimonas	0	1.64326e-05	0	0	0	0.000189414
Silvanigrella	0	7.02645e-06	0	0	5.04061e-05	0
Singulisphaera	2.91893e-05	2.34215e-06	0	1.49419e-05	7.92896e-05	0
Sinibacillus	0	6.57303e-05	4.76717e-05	3.71229e-05	0	0.000321077
Sinomicrobium	0	0.000311769	0.000205846	0.000110513	0	0
Sinomonas	0	0	0.000181436	0.000137405	0	1.46759e-05
Siphonobacter	0	0	0	0	0	2.97198e-05
Skermanella	0.00408565	0.00236811	0.000282813	9.40856e-05	0	0.000417835
Slackia	0	0	0	0	0.000176163	2.13066e-05
Smithella	0	0	2.13207e-05	1.19535e-05	0	2.05462e-05
Sneathia	0	0	0.00015687	4.50046e-05	0.00044657	1.17407e-05
Sneathiella	0	0.000150752	0.000536473	0.000555856	0	2.11902e-05
Snodgrassella	0	0.000161972	0.00036911	0.000314285	0	0.000383
Soehngenia	0	1.55334e-05	5.98672e-05	6.73998e-05	0.000249608	9.08152e-06
Solibacillus	7.78046e-05	0.000122322	0.000363277	0.000292526	0.000328619	0.00160955
Solimonas	0.000744827	4.9968e-05	2.94724e-05	5.54691e-05	0	0
Solirubrobacter	0.00477956	0.00217801	0.000752997	0.000529558	6.98942e-05	0.000903532
Solirubrobacterales_bacterium_67_14	0	0	4.38034e-05	0	0	2.72446e-05
Solitalea	0	0.000167386	8.99594e-05	6.50846e-05	1.92316e-05	2.13066e-05
Solobacterium	7.48632e-06	0.000427954	0.00171314	0.00146557	0.00147988	0.000242773
Soonwooa	0	0	0	0	0	2.64166e-05
Sorangiineae_bacterium_NIC37A_2	0	1.64326e-05	0	8.96047e-06	0	0
Sorangium	0.000593771	0.00569856	7.83047e-05	0.000122679	6.77564e-06	6.03584e-05
Sphaerisporangium	0	0	1.43653e-05	0	0	0
Sphaerobacter	2.13251e-05	0.000463606	6.15656e-06	0	0	4.5657e-05
Sphaerochaeta	0	4.96748e-05	2.86364e-05	9.17274e-05	0	0.000132701
Sphaerotilus	0	0	0	0	0	0.000296367
Sphingoaurantiacus	0.000216557	0.000657469	0.000270675	0.000180933	0.000696302	0.000428394
Sphingobacterium	0.000443517	0.00305989	0.00189716	0.00192153	0.000284524	0.00110661
Sphingobacterium_sp.	0	1.03556e-05	0	0	0	0
Sphingobium	0.0293599	0.00487323	0.00037886	0.000279758	0.000724411	0.00186227
Sphingomicrobium	0	0	1.10027e-05	0	1.91814e-05	0
Sphingomonas	0.0501901	0.10173	0.0234656	0.0245552	0.0291092	0.0138701
Sphingopyxis	0.00809317	0.0033531	0.000354864	0.000256938	0.000835614	0.00137756
Sphingorhabdus	0	1.23244e-05	5.46022e-05	2.49536e-05	0.000368341	7.82786e-05
Sphingosinicella	0	1.81223e-05	2.4206e-05	2.68814e-05	0	6.06765e-05
Spirochaeta	0	0	6.60165e-06	2.49536e-05	0.000503038	0.000139951
Spirochaeta_2	0	0	0	0	1.60148e-05	1.21752e-05
Spiroplasma	0	0	0	0	0.000548877	0
Spirosoma	0	0	1.32033e-05	0	0	1.76111e-05
Spirulina_P7	0	0	0	0	3.55885e-05	0
Spongiibacter	0	8.21629e-06	0	0	0	7.26522e-05
Sporacetigenium	0	0	1.43653e-05	0	0	2.34814e-05
Sporanaerobacter	0	0	1.4719e-05	0	0	0
Sporichthya	0.000574184	5.99478e-05	0	0	2.31325e-05	8.71097e-05
Sporobacter	0	0	8.62102e-05	8.06551e-05	0	2.11902e-05
Sporocytophaga	0.000261652	0.00056761	6.26889e-05	3.79859e-05	0.000137972	1.79369e-05
Sporolactobacillus	0	0	0	1.19473e-05	0	0
Sporomusa	1.12295e-05	0	0	0	0	1.21752e-05
Sporosarcina	0	0	3.25924e-05	4.07445e-05	0.000118576	0.000129281
Staphylococcus	0.000224533	0.0065975	0.0179665	0.0183397	0.0136854	0.0234867
Stappia	0	1.29445e-05	5.17432e-05	7.93683e-05	9.06759e-05	4.22873e-05
Stella	0	5.76883e-05	0.000253578	0.000240875	0	4.50052e-05
Stenotrophobacter	8.63805e-05	0	1.92115e-05	0	0.000217971	9.13139e-06
Stenotrophomonas	0.00166881	0.00608224	0.00182853	0.00191741	0.00357967	0.00627908
Steroidobacter	0.0299576	0.0218061	0.00601979	0.00525833	0.00147928	0.00136549
Sterolibacterium	0	0	1.64175e-05	8.96513e-06	0	0
Stomatobaculum	0	0.00041229	0.00125678	0.00127164	0	3.02717e-05
Streptococcus	0.000365109	0.179635	0.504732	0.544914	0.0349819	0.019046
Streptomonospora	0	8.21629e-06	0	0	0	0
Streptomyces	0.0320533	0.00173971	0.00205325	0.00212351	0.0027265	0.00285111
Subdoligranulum	0.000103843	0.000490004	0.00181136	0.00151394	0.0150059	0.00258193
Subgroup_10	0.00341014	0.0164065	0.0024221	0.00235853	0.00339741	0.00448469
Subgroup_23	2.39518e-05	1.18748e-05	5.88762e-06	8.96513e-06	0	0.000512825
Subsaxibacter	0	0	0	0	0	2.34814e-05
Succinatimonas	0	0	0	0	0	3.52221e-05
Succiniclasticum	3.32233e-06	5.17779e-06	8.12405e-05	2.49536e-05	2.9644e-05	0.000697409
Succinimonas	0	7.02645e-06	0	0	0	1.5219e-05
Succinivibrio	1.77709e-05	0.000558691	0.00216121	0.00225979	9.96477e-05	0.000641451
Succinivibrionaceae_UCG_001	0	0.000385738	0.00156193	0.00161789	9.9573e-05	1.76111e-05
Succinivibrionaceae_UCG_002	0	0.000210025	0.000311029	0.000378073	0	0.000232536
Sulfitobacter	0	7.76669e-06	4.35966e-05	0.000119702	0.000982496	0.00348016
Sulfobacillus	0	0.000105521	0.000386765	0.000393409	0	0
Sulfuricella	0	0	0	0	0	1.21752e-05
Sulfuricurvum	3.74316e-06	8.79244e-06	5.57891e-05	2.28236e-05	0.000442413	0.000324329
Sulfuriferula	0	4.43355e-05	0.00023975	0.000222539	0	0
Sulfurifustis	0.000190083	0.00116599	0.000154228	0.000212274	0.000142354	0.000587173
Sulfurimonas	0	0	1.49588e-05	2.09186e-05	3.55721e-05	0.000382032
Sulfuritalea	0	0	8.42786e-05	8.31788e-06	0	2.73942e-05
Sulfurospirillum	0	4.06318e-05	5.35857e-05	8.4926e-05	0.000435335	0.00053055
Sulfurovum	2.48792e-05	3.16753e-05	4.0356e-05	9.60165e-05	1.42354e-05	0.000797751
Sumerlaea	0.000206708	1.14227e-05	0.000114196	2.0914e-05	1.93171e-05	0.00023442
Sungkyunkwania	0	0	6.15656e-06	0	0	0
Sunxiuqinia	0	0	0	0	0	7.20326e-05
Sutterella	4.86611e-05	0.000400375	0.00135053	0.00126074	0.000435213	0.000587274
Suttonella	0	0	0	0	0	0.000134824
Sva0081_sediment_group	0	1.02704e-05	6.138e-05	0.000110081	0.000214182	0.000993357
Sva0996_marine_group	4.97585e-05	0.000155107	0.000216466	8.93941e-05	0.000369679	0.000453736
Symbiobacterium	1.9934e-05	0	0	0	9.14712e-05	0
Syner_01	0	7.02645e-06	5.32334e-05	4.71346e-05	0	3.63261e-05
Syntrophaceticus	0	0.000134858	0.000221577	0.00031301	0	0
Syntrophobacter	1.06625e-05	6.16221e-06	4.50831e-05	1.49419e-05	0	3.60501e-05
Syntrophococcus	0	0	4.96062e-05	6.57287e-05	5.08173e-05	0.000205929
Syntrophomonas	0	0.00495658	0.0180893	0.0175128	0.000293816	4.25467e-05
Syntrophorhabdus	0	1.31887e-05	0.000129152	8.21487e-05	0	6.58773e-05
Syntrophotalea	0	4.84437e-05	0.000138787	0.000226582	0	1.82129e-05
Syntrophothermus	0	2.67882e-05	1.49588e-05	9.08981e-05	0	0
Syntrophus	0	0	7.76755e-05	3.58605e-05	0	4.40276e-05
T2WK15B57	0	1.8037e-05	0.000120741	4.77954e-05	0	0
TM7a	0.00632691	0.00145345	0.00194222	0.00213161	0.00198299	0.000775153
TM7x	0	0.000536083	0.00197787	0.00201425	1.70887e-05	3.27469e-05
TPD_58	0	0	0	0	0	4.40276e-05
TX1A_55	0	6.16221e-06	8.20875e-06	1.38631e-05	0	5.99405e-05
Tabrizicola	5.31572e-05	0	0	0	0	5.47883e-05
Taeseokella	0	0	0	0	0	9.08152e-06
Tagaea	2.62021e-05	0.000119564	0	1.38631e-05	0	0.000124145
Tahibacter	0.0011714	0.000217971	1.54038e-05	2.38946e-05	0.000149472	8.20495e-05
Taibaiella	0.000291254	0.00175202	0.000143639	0.000129092	0.000132467	0.000202518
Tangfeifania	1.9934e-05	0	0	0	0	0
Tannerella	0	8.40656e-05	0.00027214	0.000289546	0.000111798	5.70718e-05
Tardiphaga	0	0	3.07828e-05	3.28721e-05	0	2.73942e-05
Tellurimicrobium	0	0	0	0	8.02133e-05	0
Telmatospirillum	0	0	1.02609e-05	0	0	2.93518e-05
Tenacibaculum	0	5.7514e-05	0.000102869	6.18805e-05	0.00128457	0.000409174
Tenggerimyces	0	0	0	8.96513e-06	0	0
Tepidamorphus	0	0.00012119	0	7.23268e-05	0	0
Tepidanaerobacter_acetatoxydans_Re1	0	0	2.13207e-05	0	0	0
Tepidicaulis	0	9.24332e-05	0	0	0	0
Tepidimicrobium	0	3.78465e-05	0.000190978	0.000290606	0	0.000559758
Tepidimonas	0	4.31355e-05	0	0	0.00177043	0.0011885
Tepidiphilus	0	0	8.8022e-06	4.4807e-05	0	0
Terasakiella	0	6.16221e-06	8.83143e-06	0	0	1.21087e-05
Terrabacter	0	0	0	0	0	4.18285e-05
Terracidiphilus	0	0	0	0	0.000731786	0
Terribacillus	0	1.02704e-05	0	0	0	3.64425e-05
Terriglobus	4.11748e-05	0	0	0	2.13531e-05	0
Terrimicrobium	0.000174962	0	0	0	1.52452e-05	8.68592e-05
Terrimonas	0.00254493	0.0071513	0.00195227	0.00220772	0.00278562	0.000744927
Terrisporobacter	0	0.000717108	0.00202661	0.00236803	0.00105659	0.00253099
Tessaracoccus	0	0	6.60165e-06	1.79303e-05	0.00230741	9.54718e-05
Tetragenococcus	0	0.00020097	0.000667019	0.000755238	0	0.000938377
Tetrasphaera	0	0	0	0	0.000129039	0
Thalassobacillus	0	0	0	0	2.20208e-05	0
Thalassobaculum	0.000752664	0.000224928	0	0	0	2.42839e-05
Thalassobius	0	0	1.64175e-05	0	0	0
Thalassolituus	0	0	0	0	1.69391e-05	0
Thalassospira	0	0	0	0	0	2.97862e-05
Thalassotalea	0	7.02645e-06	6.60165e-06	0	0	3.3382e-05
Thauera	0.000172179	0.00312819	0.0114426	0.0123041	0.00105601	0.001258
Thermasporomyces	0	0	2.05219e-05	0	0	0
Thermicanus	0	0	8.8022e-06	0	0	0
Thermincola	0	1.92307e-05	0.000226461	0.000254129	0	5.97897e-05
Thermoactinomyces	0	7.02645e-06	0	0	0	8.80553e-06
Thermoanaerobacterium	0	0	0	0	0.000118574	0
Thermoanaerobaculum	0	1.52427e-05	1.76629e-05	0	3.21843e-05	3.0438e-05
Thermobacillus	0	0.00035544	4.99571e-05	1.19535e-05	7.67258e-05	6.68804e-05
Thermobifida	0	0.000182812	4.84457e-05	4.01019e-05	4.5338e-05	0.000366595
Thermobispora	0	0	0	0	0	2.73942e-05
Thermoclostridium	0	0	0	0	0	6.36704e-05
Thermocrispum	0	5.95681e-05	4.19909e-05	3.66867e-05	0	2.13066e-05
Thermoflavifilum	0	2.05407e-05	0	0	0	0.000144165
Thermoflexus	0	2.25598e-05	1.83769e-05	0	0	0
Thermoleophilum	0	9.3686e-06	0	0	0	0
Thermomonas	3.98679e-05	0.00174826	0.000266192	0.000276106	0.00130029	0.00199028
Thermomonospora	0	3.08111e-05	0	0	0	0
Thermophagus	0	0	8.8022e-06	0	0	0
Thermopolyspora	0	0	0	0	0	3.28389e-05
Thermovirga	0	0	1.32033e-05	0	0	9.13139e-06
Thioalkalispira_Sulfurivermis	0	9.3686e-06	7.09532e-05	2.09124e-05	0	0.000470168
Thiobacillus	0	0.000147058	0.000692458	0.000611545	0.00311174	0.00271147
Thioclava	0	0	0	0	0	2.64166e-05
Thiofaba	0	0	1.79318e-05	0	0	0
Thiogranum	0	1.17108e-05	0	2.38946e-05	0	8.35727e-05
Thiohalomonas	0	0	0	0	0	2.72446e-05
Thiohalophilus	0	0	0	0	0	3.81573e-05
Thiomonas	0	0	0	0	5.76948e-05	2.05462e-05
Thiopseudomonas	0	0.000162301	0.000625805	0.000619779	0	0
Thiothrix	0	0	2.05774e-05	0	0.000141245	0.000300739
Thiovirga	0	0	0	0	0	2.09807e-05
Tianweitania	0	0	8.45103e-05	0.000152362	0	3.52221e-05
Tissierella	1.66116e-05	0.000761587	0.00236619	0.00259959	0	0.000294443
Tistlia	0	8.21629e-06	0	0	0	0
Tolumonas	0	4.92227e-05	4.62714e-05	0.000202031	0	0.000192449
Treponema	9.96698e-06	0.000425292	0.00151358	0.00168982	0.00363792	0.00207159
Trichlorobacter	0	0	0	0	0	0.000105581
Trichococcus	0	6.77844e-05	0	0	5.33827e-06	0.000512798
Tropheryma	0	0	0	0	4.01066e-05	0
Tropicibacter	0	0	0	0	0	7.91387e-05
Truepera	0.000139671	0.000792681	0.000453838	0.000342865	0.000317113	0.000281313
Trueperella	0	9.3686e-06	4.31807e-05	7.3404e-05	0.000334531	0
Tuberibacillus	0	0	0	0	0.000855902	0
Tumebacillus	8.60562e-05	0.000286754	6.66157e-05	8.31788e-06	0.000276661	0.00017769
Tundrisphaera	0	0	0	0	0.000340727	8.80553e-06
Tunicatimonas	0	0	0	0	7.84695e-05	3.57741e-05
Turicibacter	0	0.00075369	0.00120491	0.00101919	0.000118525	0.00151793
Turneriella	0	0	6.15656e-06	2.0051e-05	8.13077e-05	2.67846e-05
Tuzzerella	0	5.859e-05	0.000239209	0.000184122	0.0015176	0.000554614
Tyzzerella	0	0.000486101	0.000399894	0.000369341	0.001904	0.00119521
U29_B03	0	5.00068e-05	0.000272165	0.000101344	0	8.29453e-05
UBA1819	0	3.08111e-05	0.000186428	8.91876e-05	5.61928e-05	0.000689414
UBA6140	0.000187829	0.000205407	0	0	0	9.02787e-05
UCG_001	0	1.02704e-05	4.12477e-05	2.77263e-05	0	0.000105047
UCG_002	7.98245e-05	0.000447074	0.00120268	0.00114312	0.00705297	0.00383922
UCG_003	0	3.28651e-05	0.000135444	0.000401597	0.000702846	2.42174e-05
UCG_004	0	0.000488571	0.00111152	0.00104526	8.14086e-05	0.00204349
UCG_005	0.000247336	0.00109559	0.00326698	0.00292143	0.0100863	0.0324495
UCG_007	0	0	1.76044e-05	0	0	4.5657e-05
UCG_008	0	0.000268891	0.000940019	0.000798194	0	0.000433634
UCG_009	1.87158e-05	0.000197345	0.000799799	0.00077855	0.00113327	0.00101353
UCG_012	0	0	1.02609e-05	0	0	0.000106383
UKL13_1	0	0	0	0	0	2.97198e-05
UTBCD1	0.000230356	0.000567536	0.00023193	0.000446784	0.00126342	6.65978e-05
UTCFX1	5.55804e-05	0	0	0	0	0
Uliginosibacterium	0	3.45173e-05	0.000138788	6.22829e-05	0	3.22869e-05
Ulvibacter	0	2.8757e-05	7.58074e-05	3.58419e-05	0	0.000469859
Umboniibacter	0	0	0	0	0.000862686	0
Unassigned	0	0.00016746	0.000110807	9.47402e-05	0.0452027	0.0168133
Undibacterium	0	0	2.49785e-05	0	0.000132125	1.21752e-05
Urania_1B_19_marine_sediment_group	0	6.57303e-05	6.15656e-06	4.63038e-05	0.000193558	0.000313735
Ureaplasma	0.000502507	3.0324e-05	0.000130106	8.59773e-05	0.00923553	3.0438e-05
Ureibacillus	0	0	0	0	0	0.000129314
Uruburuella	0	0	0	1.19473e-05	0	0
V9D2013_group	6.75294e-05	0.000321065	0.000193352	0.000143185	0	0.00232826
Vagococcus	0	0.000104758	2.4206e-05	1.19535e-05	0.000799952	5.46221e-05
Varibaculum	0	0	0	0	1.06765e-05	0
Variovorax	0.00838371	0.00447465	0.000669202	0.000843056	0.00371293	0.00106807
Veillonella	0.000102582	0.000173476	0.000590777	0.000577344	0.000607038	1.78871e-05
Veillonellaceae_UCG_001	3.32233e-06	0	1.54038e-05	1.19473e-05	0	0.000989653
Verruc_01	0	1.02704e-05	0	0	0	0
Verrucomicrobium	4.43495e-05	8.21629e-06	0	0	0	0
Verticiella	0	0.00028819	0.000163476	0.000133785	0	0.000130266
Vibrio	0	0.000424992	0.00139087	0.000895192	0.00774468	0.0011972
Vicinamibacter	0.00165897	0	1.48104e-05	0	0.00112875	0
Vicingus	0	0.000117712	0.000277011	0.000392153	0.000222428	8.42909e-05
Virgibacillus	2.13251e-05	0.00029784	1.32033e-05	3.28721e-05	2.54087e-05	0
Virgisporangium	0.000865594	0.000608285	2.78653e-05	0	0.000249119	0.000175882
Vitellibacter	0	2.25948e-05	7.76769e-05	4.18326e-05	2.71026e-05	0
Vogesella	2.65786e-05	8.63213e-05	7.89859e-05	0.000222327	0	0.000428876
Vulcanibacillus	0	9.3686e-06	4.82666e-05	3.54135e-05	0	0
Vulcaniibacterium	0	0	0	0	2.71026e-05	0.00137531
Vulgatibacter	0	0.000395731	0.000115207	0.000123737	2.84708e-05	0.000111033
W5	0	0.00134836	0.0044493	0.00420319	0	0
W5053	0	0.00105996	0.00366644	0.00391727	0	5.33763e-05
WCHB1_32	0	0.000195206	0.000665604	0.00063922	0.00010637	0.000262634
Wandonia	0	9.65414e-05	2.9707e-05	1.38631e-05	0	0
Weissella	0.000237417	0.00115049	0.00300691	0.00321316	0.00406459	0.000861981
Wenxinia	0	0	0	0	0	2.43504e-05
Wenzhouxiangella	0	0	0	0	0.000365885	1.46759e-05
Williamsia	0	0	0	0	0	1.82628e-05
Williamwhitmania	0	3.20512e-05	0.000124187	7.61875e-05	0	0
Winogradskyella	0	1.63951e-05	0	0	0	8.74943e-05
Woeseia	0.000306895	0.00165249	0.000212002	0.000132267	0.000943434	0.00165751
Wohlfahrtiimonas	0	2.8757e-05	3.90471e-05	8.91876e-05	0	0
Wolbachia	0	0.00026871	0.000696647	0.000431664	0	0.00015323
Xanthobacter	0	0	1.10027e-05	1.79303e-05	0	0.00263187
Xanthomarina	0	0	2.75686e-05	5.24869e-05	0	0
Xanthomonas	0.00764559	0.00474343	0.00111502	0.00111626	0.00393192	0.000388377
YC_ZSS_LKJ147	0.0036209	0.00226785	0.000664614	0.000549617	0.000216789	0.000477796
YC_ZSS_LKJ63	0	1.02704e-05	3.01521e-05	1.19473e-05	0	0
Yangia	0	0	0	1.66358e-05	0	0
Yimella	0	0	0	0	0.000326974	0
Yoonia_Loktanella	0	0.000421196	0.00164739	0.00153981	0	0.00231786
Z20	0	1.39289e-05	0.000177771	5.37814e-05	0	9.72353e-05
ZOR0006	0	2.8757e-05	4.05614e-05	5.07868e-05	0.00211562	0.000168265
Zavarzinia	0	0	0	0	0	1.46759e-05
Zeaxanthinibacter	0	1.17108e-05	7.43487e-05	7.7231e-05	0	8.71263e-05
Zobellella	8.3069e-05	0	0	0	0	0
Zoogloea	0	0.000989955	0.0033701	0.0034348	0.000335394	0.000238606
Zymobacter	0	0	0	0	0	8.00356e-05
[Acetivibrio]_ethanolgignens_group	0	1.23244e-05	2.35505e-05	9.47096e-05	0	0
[Anaerorhabdus]_furcosa_group	0	0.000193108	0.000357869	0.000332219	0	0.000356065
[Bacteroides]_pectinophilus_group	0	2.1693e-05	1.98049e-05	1.66358e-05	0	0.0011403
[Clostridium]_innocuum_group	0	0.000264371	0.000730988	0.000737978	9.24197e-05	0.000729874
[Cytophaga]_xylanolytica_group	0	0.00013929	0.000387639	0.000336474	0	2.72612e-05
[Desulfobacterium]_catecholicum_group	0	0	0	0	0	0.000101777
[Eubacterium]_brachy_group	0	2.67029e-05	6.37026e-05	7.70137e-05	0.00018506	0.000388542
[Eubacterium]_cellulosolvens_group	0	0	0	0	0	7.92498e-05
[Eubacterium]_eligens_group	3.19876e-05	0.000683047	0.00156938	0.00150866	0.00131615	0.000264466
[Eubacterium]_fissicatena_group	0	0	4.30959e-05	1.38631e-05	0	4.55074e-05
[Eubacterium]_hallii_group	1.49726e-05	0.000200877	0.000441402	0.000598907	1.60148e-05	0.000926389
[Eubacterium]_nodatum_group	0	0.000933052	0.00266302	0.0026892	0.000101994	0.00359886
[Eubacterium]_oxidoreducens_group	4.86611e-05	9.21992e-05	0.000355824	0.000267992	0.00234345	0.00136102
[Eubacterium]_ruminantium_group	1.12295e-05	0.000752931	0.00103469	0.00111239	0.000888022	0.00665742
[Eubacterium]_saphenum_group	0	0.00010063	0.000326441	0.000385336	0	0
[Eubacterium]_siraeum_group	0.000156228	0.00298801	0.00708266	0.00756919	0.000823784	0.00504744
[Eubacterium]_ventriosum_group	2.65786e-05	0.000482949	0.00104607	0.00123195	2.13531e-05	0.000665258
[Eubacterium]_xylanophilum_group	0	0.000416912	0.0011957	0.0011633	0.000518549	0.00551546
[Eubacterium]_yurii_group	0	1.03556e-05	5.32918e-05	6.27113e-05	0	0
[Ruminococcus]_gauvreauii_group	0	5.91249e-05	0.000156449	0.000187981	0	0.000886665
[Ruminococcus]_gnavus_group	0	0.000298268	0.000363395	0.000359752	0.0012296	0.00188729
[Ruminococcus]_torques_group	0	0.00147826	0.00252323	0.00267681	0.00608765	0.00491931
[Streptomyces]_thermoautotrophicus	0	0.000151552	0.000131678	0.000184578	0	2.11902e-05
agricultural_soil_bacterium_SC_I_84	0	0.000247277	0.000473339	0.000589498	0	0
alphaI_cluster	0	0	5.79312e-05	0.000116721	8.98782e-05	0.000613375
alpha_proteobacterium_1153_i2a	0.000266484	0	0	0	0	0
alpha_proteobacterium_HIMB59	0	0	1.89148e-05	3.45613e-05	0	1.17407e-05
alpha_proteobacterium_SCGC_AAA015_N04	0	0	5.06126e-05	0	0	0.000174035
bacterium_Ellin6515	0	6.16221e-06	5.21313e-05	5.22743e-05	0	3.02717e-05
bacterium_Ellin6517	0	3.12257e-05	4.48763e-05	5.07868e-05	0	4.84348e-05
bacterium_Ellin6527	0	0	0	8.96047e-06	0	0
bacterium_Ellin6537	0	0	0	0	4.20643e-05	9.08152e-06
bacterium_Ellin7530	0	0	1.02609e-05	0	0.000123655	3.32989e-05
bacterium_LWQ8	0	0	5.22161e-05	2.49536e-05	0	0
bacterium_P201	0	0	1.10027e-05	0	0	0
bacterium_QTYC46b	0	2.8757e-05	0	8.96513e-06	0	0.000160739
bacterium_WH6_7	0	0	0	0	0	3.58738e-05
bacterium_WHC7_12	0	0	0	8.96047e-06	0	0
bacterium_WX65	4.62043e-05	5.41111e-05	0	0	0	0.000302505
bacterium_YC_ZSS_LKJ129	0	0	0	0	0	9.08152e-06
bacterium_YC_ZSS_LKJ159	0	0	0	1.10905e-05	0	0
beta_proteobacterium_WF17	0	7.02645e-06	0	0	0	0
beta_proteobacterium_WY25	0	0	0	0	4.66762e-05	0
candidate_division_TM6_bacterium_JCVI_TM6SC1	0	0	0	0	0	7.30511e-05
dgA_11_gut_group	2.13251e-05	0.00010591	7.38123e-05	2.94445e-05	0.00013427	0.00106545
endosymbiont_TC1_of_Trimyema_compressum	0	0	0	0	0	1.17407e-05
endosymbiont_of_Acanthamoeba_sp._UWC8	1.12295e-05	0	0	0	0	0
endosymbionts	0	0	0	0	0	2.99038e-05
gamma_proteobacterium_OR_113	0	9.85954e-05	0	0	0	0
hgcI_clade	0	4.2319e-05	0.000117852	5.0123e-05	0.000523833	6.08759e-05
horsej_a03	0	0	5.88762e-06	4.48256e-05	0	0
marine_gamma_proteobacterium_HTCC2089	0	0	0	0	0	5.12014e-05
marine_group	0	0	3.55099e-05	5.48327e-05	0.000295425	0
mle1_7	5.03254e-05	0.00118571	0.000621196	0.000840012	0.00129634	0.000672776
oc32	0	0	0	0	0	8.97434e-05
possible_genus_03	0	0	2.94381e-06	1.79303e-05	0	0
possible_genus_04	6.97957e-05	3.28715e-05	9.20766e-05	5.78195e-05	5.08173e-06	9.37238e-05
possible_genus_Sk003_Sk004	0	0	0	0	0	2.72446e-05
possible_genus_Sk018	0	0	1.4719e-05	3.17934e-05	0	0
probable_genus_10	0	0.000128593	0.000140097	2.68814e-05	0	0.0010897
unclassified_0319_6G20	0.000133016	0.00149104	0.00040264	0.000329432	0.00238922	0.000348352
unclassified_0319_7L14	9.96698e-06	0	0	0	0	8.80553e-06
unclassified_1013_28_CG33	0	0	0	0	0	7.29182e-05
unclassified_113B434	0	7.76669e-06	1.23131e-05	2.49536e-05	4.40417e-05	0
unclassified_11_24	0	1.52427e-05	3.40219e-05	2.09124e-05	8.00414e-05	0
unclassified_211ds20	8.53003e-05	0.00011004	1.54038e-05	0	0	9.27872e-05
unclassified_27F_1492R	0	1.03556e-05	6.15656e-06	8.31788e-06	0.000389694	2.05462e-05
unclassified_32_520	0	0	3.04211e-05	2.68861e-05	0	0
unclassified_37_13	0.000121674	0.000291777	7.76755e-05	0.000145712	0.000628704	9.81565e-05
unclassified_67_14	0.00524763	0.00189781	0.000802967	0.00111845	0.00139327	0.0012495
unclassified_A0839	0	0.000111144	0.000451955	0.000398358	0.000943158	0.000183451
unclassified_A21b	0	0.000742181	0.00233592	0.00242505	0.00203502	0.000336913
unclassified_A4b	0.00114488	0.00013801	0.000391345	0.000356294	0.00159773	0.00121893
unclassified_AB1	2.62021e-05	0	0	0	1.60148e-05	0
unclassified_ABY1	0	0	1.17752e-05	0	0	0
unclassified_AEGEAN_169_marine_group	0	8.21629e-06	5.50137e-05	0	0.000113883	5.28332e-05
unclassified_AKAU3564_sediment_group	0	0	0	0	0.000270284	1.21752e-05
unclassified_AKIW659	0	0	6.60165e-06	0	0	1.51359e-05
unclassified_AKIW781	3.82289e-05	0	0	0	0.000324341	4.87008e-05
unclassified_AKYG1722	0.000247258	0.000353356	0.000246673	0.000291687	0.000311399	0.000336981
unclassified_AKYH767	2.2459e-05	0.000815809	0.00095835	0.000918358	0.00137454	0.000253317
unclassified_Absconditabacteriales__SR1	0	0.000185729	0.000842899	0.000736084	0	0
unclassified_Acetobacteraceae	0.000222636	0.000727828	0.00212707	0.00202722	0.0126837	0.00135967
unclassified_Acholeplasmataceae	0	1.23244e-05	1.71593e-05	0	0	8.63992e-05
unclassified_Acidaminococcaceae	0	1.23244e-05	0.000217001	0.000239827	0	2.64166e-05
unclassified_Acidimicrobiaceae	0	0	0	8.96047e-06	0.000282488	3.59581e-05
unclassified_Acidimicrobiia	0.0068892	0.00989175	0.00108411	0.00102815	0.00872489	0.00186076
unclassified_Aciditerrimonas_sp.	0	0	0	0	0	7.66405e-05
unclassified_Acidobacteriaceae__Subgroup_1	0	0	5.57307e-05	4.26681e-05	0.0125055	8.12637e-05
unclassified_Acidobacteriae	6.19918e-05	0.000172933	0.000252863	0.00018754	0.00113867	0.00075844
unclassified_Acidobacteriales	0.000367129	5.67388e-05	0.000346481	0.00021185	0.0298514	0.000283327
unclassified_Acidobacteriota	1.49726e-05	4.36366e-05	6.58725e-05	5.54525e-05	0.000464792	2.42673e-05
unclassified_Actinobacteria	0.00234848	0.000558171	0.00089053	0.000709158	0.00274891	0.000812567
unclassified_Actinobacteria_bacterium_CG2_30_50_142	0	0	0	0	0.000161927	0
unclassified_Actinobacteriota	0.0036009	0.000426653	0.000539718	0.000507186	0.0012018	0.000816858
unclassified_Actinomarinales	0.000510728	0.00854613	0.00126446	0.000940016	0.00134827	0.00161881
unclassified_Actinomycetaceae	0	0	0	0	0	8.77115e-05
unclassified_Aenigmarchaeota	0	0	0	0	0	1.82628e-05
unclassified_Aerococcaceae	0	9.99761e-05	0.000350073	0.000497376	0	5.70563e-05
unclassified_Aeromonadaceae	8.53003e-05	4.10814e-06	5.93278e-05	2.83688e-05	0	0
unclassified_Alcaligenaceae	0.000168679	0.00140726	0.000622184	0.000725431	9.40139e-05	0.00061684
unclassified_Alkalibaculum	0	9.3686e-06	0	5.08024e-05	0	0
unclassified_Alkaliphilus	1.32893e-05	6.94041e-05	0.000211261	0.000128454	9.65529e-05	0
unclassified_Alphaproteobacteria	0.00358138	0.0165483	0.00804936	0.00761635	0.0183399	0.00753294
unclassified_Alteromonadaceae	0	1.39289e-05	1.68626e-05	3.41345e-05	5.92881e-05	0.000156893
unclassified_Amb_16S_1323	6.97688e-05	0.00218495	0.00129916	0.00157097	0.000687307	0.000198888
unclassified_Amoebophilaceae	0	0	0	0	0	1.17407e-05
unclassified_Anaerolineaceae	0.000829404	6.17964e-05	0.000207245	0.000167904	0.00262918	0.000620902
unclassified_Anaerolineae	0.000265628	8.68574e-05	0.000138078	0.000136957	0.00306011	0.000937316
unclassified_Anaeromyxobacter_dehalogenans	0	1.72968e-05	2.0967e-05	1.79209e-05	0	8.80553e-06
unclassified_Anaerovoracaceae	0	0.00247176	0.00655294	0.00645978	0.000924807	0.00304305
unclassified_Archaea	0	2.46489e-05	1.17752e-05	2.90114e-05	0.0125631	0.000601279
unclassified_Arcobacteraceae	0	6.16221e-06	4.62115e-05	4.56518e-05	0.000413314	0.000333662
unclassified_Ardenticatenaceae	9.30091e-05	0.00090365	0.0017242	0.00165315	0	0.000305856
unclassified_Ardenticatenales	0.000144829	0.000282849	0.000794102	0.00064497	0.00196319	0.000655158
unclassified_Arenicellaceae	0	2.16956e-05	1.76044e-05	4.48101e-05	0	4.79825e-05
unclassified_Armatimonadota	0	0	0	0	0.000182942	0
unclassified_Atopobiaceae	4.11748e-05	1.29445e-05	1.76044e-05	0	0	0.000497981
unclassified_Azospirillaceae	7.46377e-05	0.000190943	5.17746e-05	0	2.84708e-05	3.29387e-05
unclassified_Azospirillales	0.00814262	0.0208954	0.000618369	0.000695352	0.000766755	0.00107351
unclassified_B1_7BS	0	0.000790553	0.0013045	0.00184751	0.00104044	0.000823733
unclassified_B2M28	0	0	3.96406e-05	3.88168e-05	0	0.000159818
unclassified_BIrii41	0.00673463	0.00607634	0.00144297	0.0015044	0.00214598	0.00158288
unclassified_BSV26	0	7.81902e-05	0.000177003	0.000188587	9.80075e-05	0.000191746
unclassified_Babeliaceae	0	2.78552e-05	8.20875e-06	8.96513e-06	0	0
unclassified_Babeliales	0	0.000585968	0.00251996	0.00249994	0.000326186	0.000245775
unclassified_Bacillaceae	1.49726e-05	0.000781771	0.000837849	0.000739629	0.000121054	0.00401472
unclassified_Bacillales	0	0.000135819	0.000186458	0.000165101	0.000847463	0.000283014
unclassified_Bacilli	0.000361607	0.000984774	0.00164081	0.00120671	0.00450563	0.00276642
unclassified_Bacteria	0.884317	0.0473848	0.0252192	0.0230261	0.154888	0.0488396
unclassified_Bacteriovoracaceae	6.28778e-05	4.58096e-05	5.09415e-05	6.35821e-05	7.28381e-05	3.95694e-05
unclassified_Bacteroidales	2.62021e-05	0.00356422	0.0102641	0.00989974	0.00240918	0.00349711
unclassified_Bacteroidales_BS11_gut_group	0	8.17133e-05	0.000239147	0.000189461	0	0.00329795
unclassified_Bacteroidales_RF16_group	0	0.00045572	0.000604665	0.000840631	0.000740239	0.00372818
unclassified_Bacteroidales_UCG_001	0	0.000265958	0.000613848	0.000598019	0	3.29309e-05
unclassified_Bacteroidetes_BD2_2	0	1.02704e-05	1.43653e-05	8.31788e-06	0	6.04337e-05
unclassified_Bacteroidetes_VC2.1_Bac22	0	0.000229512	8.83143e-06	0	0	0
unclassified_Bacteroidetes_vadinHA17	1.42167e-05	0.000643632	0.00194719	0.00218871	0.000177387	0.00101276
unclassified_Bacteroidia	0.00102756	0.00136812	0.00149346	0.00141857	0.00210864	0.00236147
unclassified_Bacteroidota	0	2.08288e-05	1.98049e-05	1.66358e-05	0	0
unclassified_Balneolaceae	2.48792e-05	0.00521926	0.000641847	0.00054024	0.000369322	0.00042322
unclassified_Barnesiellaceae	1.12295e-05	0.000151887	0.000183636	0.000150408	0	0.00236049
unclassified_Bathyarchaeia	0	0	6.15656e-06	0	2.2669e-05	0
unclassified_Bdellovibrionales_bacterium_GWC1_52_8	0	1.03556e-05	7.53872e-05	4.28746e-05	0	1.17407e-05
unclassified_Bdellovibrionota	0	4.6843e-06	7.74438e-05	0.000100915	0.000480682	9.67266e-05
unclassified_Beggiatoaceae	0	9.3686e-06	0	8.96513e-06	0	6.27926e-05
unclassified_Beijerinckiaceae	0.000121922	0.000248989	0.000292619	0.000301271	0.0024064	0.000843716
unclassified_Bifidobacteriaceae	0	0	3.30375e-05	2.98791e-05	0.000121962	0.000727333
unclassified_Blastocatellaceae	0.000757481	1.43785e-05	8.56774e-05	3.66914e-05	0.00124439	0
unclassified_Blastocatellia	0	0	6.60165e-06	0	0	2.73942e-05
unclassified_Blfdi19	0.000318075	0.000236225	6.60165e-06	4.37469e-05	0.00038698	1.21087e-05
unclassified_Bradymonadaceae	0	2.25948e-05	0.000214731	0.000255546	0	2.40334e-05
unclassified_Bradymonadales	0	0.000138124	0.000471731	0.000223586	0	0.000308418
unclassified_Burkholderiaceae	0	0.0001178	6.27525e-05	4.28808e-05	2.49119e-05	0.000165089
unclassified_Burkholderiales	0.000256057	0.00142164	0.00166797	0.00155373	0.0061154	0.00373634
unclassified_Butyricicoccaceae	0	1.43785e-05	0.000354868	0.00029787	0.000647954	0.000856582
unclassified_C0119	1.42167e-05	0	0	0	0	0
unclassified_CAP_aah99b04	0	0	0	1.19535e-05	0	0
unclassified_CCD24	0	0.000332915	0.000117818	6.93478e-05	1.2456e-05	0.000160579
unclassified_CWT_CU03_E12	0	2.69974e-05	4.09787e-05	3.28628e-05	0.00035785	8.80553e-06
unclassified_Caedibacteraceae	0	0	1.02609e-05	0	0	0
unclassified_Caldilineaceae	0.000242861	0.000171906	0.000416423	0.000341797	0.000216276	0.00109585
unclassified_Calditrichaceae	0	0	0	0	0	5.64123e-05
unclassified_Caloramatoraceae	0	1.87372e-05	8.96005e-05	9.26194e-05	0	7.26522e-05
unclassified_Campylobacterales	0	7.02645e-06	3.6457e-05	4.11807e-05	0	7.16147e-05
unclassified_Candidatus_Abawacabacteria_bacterium_RBG_16_42_10	0	0	2.4923e-05	2.77263e-06	0.000118574	0
unclassified_Candidatus_Adlerbacteria_bacterium_GW2011_GWC1_50_9	0	1.68472e-05	0	0	0.00161886	4.87008e-05
unclassified_Candidatus_Buchananbacteria_bacterium_RIFCSPLOWO2_01_FULL_45_31	0	6.16221e-06	0	0	0	0
unclassified_Candidatus_Buchananbacteria_bacterium_RIFCSPLOWO2_01_FULL_56_15	0	0	6.15656e-06	2.98838e-06	0	0
unclassified_Candidatus_Dadabacteria_bacterium_CSP1_2	0	0	0	1.10905e-05	0.000256237	0
unclassified_Candidatus_Doudnabacteria_bacterium_RIFCSPLOWO2_02_FULL_48_13	0	0	1.27582e-05	0	0.000107946	0
unclassified_Candidatus_Falkowbacteria	0	1.29445e-05	9.14444e-05	7.95841e-05	0	0
unclassified_Candidatus_Gastranaerophilales_bacterium_Zag_111	0	0	1.23131e-05	0	0	0
unclassified_Candidatus_Jidaibacter	0	7.76669e-06	1.02609e-05	3.28613e-05	0	0
unclassified_Candidatus_Kaiserbacteria	0	5.17779e-06	3.99665e-05	3.81923e-05	6.66611e-05	6.68139e-05
unclassified_Candidatus_Kaiserbacteria_bacterium_RIFOXYB1_FULL_46_14	0	1.84866e-05	0	0	0	0
unclassified_Candidatus_Kapabacteria_sp._59_99	0	0	1.79318e-05	2.68954e-05	0	8.81205e-05
unclassified_Candidatus_Komeilibacteria_bacterium_RIFOXYC1_FULL_37_11	0	0	0	0	0	1.21087e-05
unclassified_Candidatus_Magasanikbacteria	0	0	0	0	0.000109857	0
unclassified_Candidatus_Magasanikbacteria_bacterium_RIFOXYD1_FULL_40_23	0	0	0	8.96513e-06	0	0
unclassified_Candidatus_Moranbacteria	0	0	0	8.31788e-06	0	0
unclassified_Candidatus_Peregrinibacteria	0	9.3686e-06	0.000115775	8.6623e-05	1.42354e-05	4.45708e-05
unclassified_Candidatus_Peregrinibacteria_bacterium_GW2011_GWF2_39_17	0	0	0	0	0	1.76111e-05
unclassified_Candidatus_Peregrinibacteria_bacterium_RIFCSPLOWO2_02_FULL_48_14	0	0	0	0	1.18574e-05	0
unclassified_Candidatus_Peribacteria	0	0.00012253	0.000425402	0.000403062	0	2.09142e-05
unclassified_Candidatus_Peribacteria_bacterium_RIFCSPLOWO2_01_FULL_51_18	0	0	0	0	0	1.76111e-05
unclassified_Candidatus_Peribacteria_bacterium_RIFOXYC2_FULL_55_14	0	0.000327024	0.000870086	0.0009173	0	0
unclassified_Candidatus_Raymondbacteria	0	0	8.83143e-06	0	0	1.17407e-05
unclassified_Candidatus_Saccharibacteria_bacterium_GW2011_GWC2_44_17	9.96698e-06	0	6.60165e-06	0	0	0
unclassified_Candidatus_Saccharibacteria_bacterium_UB2523	0	2.69535e-05	5.9835e-05	0.000109229	0.000171132	0.000297437
unclassified_Candidatus_Sonnebornia_yantaiensis	3.43825e-05	0	0	0	0.000111309	0
unclassified_Candidatus_Uhrbacteria	0	6.16221e-06	0	0	0	0
unclassified_Candidatus_Wolfebacteria	0	0	0	0	0	2.11902e-05
unclassified_Candidatus_Yanofskybacteria	0	2.5889e-06	2.1412e-05	2.26094e-05	0	0
unclassified_Candidatus_Yanofskybacteria_bacterium_GW2011_GWA2_41_22	0	0	0	0	0	2.13066e-05
unclassified_Candidatus_Yanofskybacteria_bacterium_GW2011_GWF1_44_227	0	0	1.23131e-05	0	0.000162615	0
unclassified_Candidatus_Yanofskybacteria_bacterium_RIFCSPLOWO2_02_FULL_45_18	0	1.02704e-05	0	0	0	0
unclassified_Cardiobacteriaceae	0	0	0	0	0	2.08721e-05
unclassified_Carnobacteriaceae	0	2.93771e-05	0.000133225	0.000128876	0	6.58619e-05
unclassified_Caulobacteraceae	0.00227552	0.00436394	0.000662611	0.00061519	0.00769766	0.000737369
unclassified_Caulobacterales	0	6.16221e-06	0	0	0	0
unclassified_Cellulomonadaceae	0	5.13518e-05	0	0	0	0.000162663
unclassified_Cellvibrionaceae	0.000829035	0.00073843	0.000184136	0.000209913	0	0.000775883
unclassified_Chitinivibrionia	0	0	3.848e-05	2.60246e-05	0	0
unclassified_Chitinophagaceae	0.00322518	0.0139226	0.0100984	0.0106363	0.00864091	0.0016319
unclassified_Chitinophagales	0.000115281	0.00187826	0.0060055	0.00559514	7.65152e-05	0.000295572
unclassified_Chlamydiales	9.96698e-06	1.84866e-05	8.20875e-06	1.19473e-05	0.000164592	2.99038e-05
unclassified_Chlorobi_bacterium_OLB5	0	7.6428e-05	0.000359772	0.000353967	0.000180963	0.00011065
unclassified_Chloroflexaceae	0	8.21629e-06	0	0	0	9.13139e-06
unclassified_Chloroflexi	0.00334192	0.00203224	0.000634193	0.000597015	0.00342154	0.000603049
unclassified_Chloroflexi_bacterium_ADurb.Bin180	0	0	0	0	4.01066e-05	0
unclassified_Christensenellaceae	0.00016873	0.000308814	0.000777598	0.000676779	0.000708646	0.00110044
unclassified_Chromatiaceae	0	0	6.60165e-06	1.49419e-05	8.46955e-06	0.000115826
unclassified_Chromobacteriaceae	0	0.00018995	0.000873699	0.000665666	0.000110036	2.34814e-05
unclassified_Chthoniobacterales	0	0	0	8.96513e-06	0	0
unclassified_Chthonomonadales	0	0	0	0	0.000106373	0
unclassified_Clade_III	0	0	0	0	1.77942e-05	0
unclassified_Cloacimonadaceae	0	2.25948e-05	0.000162075	0.000124606	0	0
unclassified_Cloacimonadales	0	0.000125485	0.000273294	0.00025754	0	0
unclassified_Clostridia	3.9096e-05	0.00188077	0.00566982	0.00499634	0.00753005	0.0172693
unclassified_Clostridia_UCG_014	0.000144657	0.00795471	0.0135571	0.013085	0.0158073	0.0308852
unclassified_Clostridia_vadinBB60_group	4.36554e-05	0.00451994	0.0108015	0.010938	0.00379858	0.00921227
unclassified_Clostridiaceae	0	0.000382541	0.00116025	0.00105662	0.000188619	0.000207852
unclassified_Clostridiales	0	1.52427e-05	6.60165e-06	4.33154e-05	0	2.12401e-05
unclassified_Clostridiales_bacterium_feline_oral_taxon_148	0	0	3.07828e-05	1.94084e-05	0	0
unclassified_Clostridiales_bacterium_oral_taxon_075	0	0.000111144	0.000429506	0.000355666	0.000428816	0
unclassified_Colwelliaceae	0	0	0	0	0.000190071	2.99958e-05
unclassified_Comamonadaceae	0.0252728	0.0386549	0.012003	0.0117436	0.0124791	0.00971545
unclassified_Competibacteraceae	0	0	1.02609e-05	0	0	0
unclassified_Coriobacteriales	0	6.16221e-06	0	0	2.03269e-05	5.1135e-05
unclassified_Coriobacteriales_Incertae_Sedis	0	0	0	0	9.253e-05	2.72446e-05
unclassified_Corynebacteriaceae	0	0	6.15656e-06	0	0	1.21087e-05
unclassified_Corynebacteriales	0	1.17108e-05	0	0	0	1.5219e-05
unclassified_Crocinitomicaceae	0	3.16753e-05	0	3.96735e-05	0	1.8163e-05
unclassified_Cryomorphaceae	0	3.28651e-05	1.32033e-05	8.31788e-06	0.000373497	0.000338846
unclassified_Cyanobacteriales	0.000461386	5.64946e-05	0.000368992	0.000208629	0.000724937	0.000181895
unclassified_Cyanobacteriia	3.86497e-05	0	1.02609e-05	0	0	0.000107923
unclassified_Cyclobacteriaceae	4.55088e-05	0.000216088	0.000332684	0.000269009	0.00015343	0.000648113
unclassified_Cytophagales	0	2.78578e-05	0.00010075	5.33271e-05	0.000144733	0.000102421
unclassified_D05_2	0.0059299	0.0012202	2.72719e-05	2.98838e-05	0.00014822	0
unclassified_DEV007	0	0	8.83143e-06	0	5.08173e-06	6.04836e-05
unclassified_DS_100	0.00030292	0	0	0	0	0
unclassified_DTU014	0	0.000173398	0.000921022	0.000817304	0.000254087	0
unclassified_Dadabacteriales	0	1.02704e-05	1.54038e-05	1.79303e-05	0	9.13139e-06
unclassified_Defluviicoccales	5.19391e-05	0.000542036	4.79421e-05	3.8197e-05	0	0.000336354
unclassified_Dehalococcoidales	0	0	0	0	3.17731e-05	0.000144147
unclassified_Dehalococcoidia	0.000872967	0.000174827	6.08765e-05	4.15894e-05	0.00132141	0.000279499
unclassified_Dehalococcoidia_bacterium_SCGC_AB_540_C11	0	0	0	0	0	9.08152e-06
unclassified_Desulfarculaceae	0	0	0	0	0	1.51359e-05
[truncated: 650 more rows]
