# Supplementary material for: Vertical transfer and functional characterization of cotton seed core microbiome
Source: Front Microbiol. 2024 Jan 9;14:1323342. doi: 10.3389/fmicb.2023.1323342 (PMC10803423; doi:10.3389/fmicb.2023.1323342)
Supplement: Supplementary file 9 [file Table_5.xlsx]

## Sheet: Sheet1
Table S5. Topological properties of networks for bacterial ASVs under different microhabitats
Topological properties	Rhizo	Root	Stem	Leaf	Seed-P	Seed
Total nodes	230	111	328	309	171	78	Number of nodes in the network
Total links	1791	466	2736	1949	1271	343	Number of links in the network
Average degree (avgK)	15.574	8.396	14.488	12.615	14.865	8.795	Higher avgK means a more complex network.
Average clustering coefficient (avgCC)	0.426	0.436	0.314	0.293	0.486	0.483	It is used to measure the extent of module structure present in a network.
Average path distance (GD)	2.788	3.372	2.767	2.795	2.711	3.279	A smaller GD means all the nodes in the network are closer.
Maximal degree	50	27	43	30	37	26	Max of the connectivity (degree) of the network.
Nodes with max degree	Reyranellales	Christensenellales、Fusobacteriales	Vicinamibacterales	Staphylococcales	Myxococcales	Christensenellales	Node labels with max degree.
Maximal betweenness	1514.18	623.179	1455.63	956.503	660.946	879.185	Max of the betweenness of the network.
Nodes with max betweenness	Syntrophomonadales	Bacteroidales	Caldisericales	Chromatiales	Myxococcales	Acholeplasmatales	Node labels with max betweenness.
Maximal harmonic closeness centrality	0.552766	1	0.501019	0.474838	0.563725	1	Max of the armonic closeness centralityof the network.
Nodes with max harmonic closeness centrality	Reyranellales	Symbiobacteriales、Thermoactinomycetales	Vicinamibacterales	Staphylococcales	Myxococcales	Streptomycetales、Chitinophagales	Node labels with maxarmonic closeness centrality
Maximal eigenvector centrality	1	1	1	1	1	10	Max of the eigenvector centrality of the network.
Nodes with max eigenvector centrality	Reyranellales	Christensenellales	Vicinamibacterales	Pseudomonadales	Myxococcales	Solibacterales	Node labels with max eigenvector centrality.
Maximal closeness centrality	0.470226	1	0.44249	0.425414	0.48433	1	Max of the closeness centrality of the network.
Nodes with max closeness centrality	Reyranellales	Symbiobacteriales、Thermoactinomycetales	Vicinamibacterales	Staphylococcales	Myxococcales	Streptomycetales、Chitinophagales	Node labels with max closeness centrality.
Density (D)	0.068	0.076	0.044	0.041	0.087	0.114	It is closely related to the average connectivity.
Modularity	0.419	0.422	0.44	0.441	0.5	0.29	It is used to demonstrate a network which could be naturally divided into communities or modules.
