# Supplementary material for: Vertical transfer and functional characterization of cotton seed core microbiome
Source: Front Microbiol. 2024 Jan 9;14:1323342. doi: 10.3389/fmicb.2023.1323342 (PMC10803423; doi:10.3389/fmicb.2023.1323342)
Supplement: Supplementary file 11 [file Table_7.xlsx]

## Sheet: Sheet1
Table S7: Detailed taxonomy classification of core endophytic microbiota in cotton seeds with a 70% occurrence rate in the collected samples.
Endosphere	Leaf	Stem	Root	SeedP	Seed	Taxonomy
ASV1070	114	120	2644	335	130	k__Bacteria; p__Actinobacteriota; c__Acidimicrobiia; o__Microtrichales; f__Ilumatobacteraceae; g__Ilumatobacter; s__unclassified_Ilumatobacter
ASV133	878	1169	325	417	213	k__Bacteria; p__Bacteroidota; c__Bacteroidia; o__Bacteroidales; f__Bacteroidaceae; g__Bacteroides; s__unclassified_Bacteroides
ASV18198	13	26	8	4996	247	k__Bacteria; p__Firmicutes; c__Bacilli; o__Erysipelotrichales; f__Erysipelotrichaceae; g__Allobaculum; s__unclassified_Allobaculum
ASV859	121	185	77	832	440	k__Bacteria; p__Firmicutes; c__Bacilli; o__Lactobacillales; f__Lactobacillaceae; g__Lactobacillus; s__unclassified_Lactobacillus
ASV72	1502	1647	733	2141	1854	k__Bacteria; p__Firmicutes; c__Clostridia; o__Clostridiales; f__Clostridiaceae; g__Clostridium_sensu_stricto_1; s__unclassified_Clostridium_sensu_stricto_1
ASV206	732	788	325	1683	1775	k__Bacteria; p__Firmicutes; c__Clostridia; o__Clostridiales; f__Clostridiaceae; g__Clostridium_sensu_stricto_1; s__unclassified_Clostridium_sensu_stricto_1
ASV314	544	513	327	4132	462	k__Bacteria; p__Firmicutes; c__Clostridia; o__Lachnospirales; f__Lachnospiraceae; g__Agathobacter; s__unclassified_Agathobacter
ASV167	947	1046	478	1506	183	k__Bacteria; p__Firmicutes; c__Clostridia; o__Lachnospirales; f__Lachnospiraceae; g__unclassified_Lachnospiraceae; s__unclassified_Lachnospiraceae
ASV1726	104	145	62	3722	160	k__Bacteria; p__Firmicutes; c__Clostridia; o__Lachnospirales; f__Lachnospiraceae; g__unclassified_Lachnospiraceae; s__unclassified_Lachnospiraceae
ASV1492	68	119	45	614	225	k__Bacteria; p__Firmicutes; c__Clostridia; o__Oscillospirales; f__Oscillospiraceae; g__unclassified_Oscillospiraceae; s__unclassified_Oscillospiraceae
ASV273	617	544	281	3887	599	k__Bacteria; p__Firmicutes; c__Clostridia; o__Oscillospirales; f__Ruminococcaceae; g__Faecalibacterium; s__unclassified_Faecalibacterium
ASV521	258	256	127	1942	283	k__Bacteria; p__Firmicutes; c__Clostridia; o__Oscillospirales; f__Ruminococcaceae; g__Faecalibacterium; s__unclassified_Faecalibacterium
ASV574	227	287	109	1944	280	k__Bacteria; p__Firmicutes; c__Clostridia; o__Oscillospirales; f__Ruminococcaceae; g__Faecalibacterium; s__unclassified_Faecalibacterium
ASV32358	19	43	16	708	160	k__Bacteria; p__Firmicutes; c__Clostridia; o__Oscillospirales; f__Ruminococcaceae; g__unclassified_Ruminococcaceae; s__unclassified_Ruminococcaceae
ASV625	180	204	8740	371	281	k__Bacteria; p__Proteobacteria; c__Alphaproteobacteria; o__Azospirillales; f__unclassified_Azospirillales; g__unclassified_Azospirillales; s__unclassified_Azospirillales
ASV1335	105	151	217	2596	1318	k__Bacteria; p__Proteobacteria; c__Alphaproteobacteria; o__Caulobacterales; f__Caulobacteraceae; g__Brevundimonas; s__unclassified_Brevundimonas
ASV4594	27	62	23	2202	271	k__Bacteria; p__Proteobacteria; c__Alphaproteobacteria; o__Rhizobiales; f__Beijerinckiaceae; g__Methylobacterium_Methylorubrum; s__unclassified_Methylobacterium_Methylorubrum
ASV161	996	1177	894	2469	1441	k__Bacteria; p__Proteobacteria; c__Alphaproteobacteria; o__Rhizobiales; f__Xanthobacteraceae; g__Bradyrhizobium; s__unclassified_Bradyrhizobium
ASV1023	161	155	6228	724	159	k__Bacteria; p__Proteobacteria; c__Gammaproteobacteria; o__Burkholderiales; f__Nitrosomonadaceae; g__MND1; s__unclassified_MND1
ASV105	1033	1371	648	1544	560	k__Bacteria; p__Proteobacteria; c__Gammaproteobacteria; o__Enterobacterales; f__Enterobacteriaceae; g__Enterobacter; s__unclassified_Enterobacter
ASV13	4828	5801	3447	136296	19435	k__Bacteria; p__Proteobacteria; c__Gammaproteobacteria; o__Enterobacterales; f__Enterobacteriaceae; g__Escherichia_Shigella; s__unclassified_Escherichia_Shigella
ASV458	321	377	128	21165	1718	k__Bacteria; p__Proteobacteria; c__Gammaproteobacteria; o__Enterobacterales; f__Enterobacteriaceae; g__Escherichia_Shigella; s__unclassified_Escherichia_Shigella
ASV63	1565	1894	592	1790	1170	k__Bacteria; p__Proteobacteria; c__Gammaproteobacteria; o__Enterobacterales; f__Enterobacteriaceae; g__Klebsiella; s__unclassified_Klebsiella
ASV82	1251	1414	801	3531	1464	k__Bacteria; p__Proteobacteria; c__Gammaproteobacteria; o__Enterobacterales; f__Enterobacteriaceae; g__unclassified_Enterobacteriaceae; s__unclassified_Enterobacteriaceae
ASV7	8509	10687	2777	1199	359	k__Bacteria; p__Proteobacteria; c__Gammaproteobacteria; o__Enterobacterales; f__Pasteurellaceae; g__Haemophilus; s__unclassified_Haemophilus
ASV795	175	233	51	398	69	k__Bacteria; p__Proteobacteria; c__Gammaproteobacteria; o__Enterobacterales; f__Yersiniaceae; g__Serratia; s__unclassified_Serratia
ASV400	281	282	126	2153	1727	k__Bacteria; p__Proteobacteria; c__Gammaproteobacteria; o__Pseudomonadales; f__Moraxellaceae; g__Enhydrobacter; s__unclassified_Enhydrobacter
ASV678	250	288	118	268	250	k__Bacteria; p__Proteobacteria; c__Gammaproteobacteria; o__Pseudomonadales; f__Pseudomonadaceae; g__Pseudomonas; s__unclassified_Pseudomonas
ASV124	863	1314	287	331	253	k__Bacteria; p__Proteobacteria; c__unclassified_Proteobacteria; o__unclassified_Proteobacteria; f__unclassified_Proteobacteria; g__unclassified_Proteobacteria; s__unclassified_Proteobacteria
